# Supplementary material for: Obesity alters molecular and functional cardiac responses to ischemia/reperfusion and glucagon-like peptide-1 receptor agonism
Source: Springer Nature journal article supplement (doi:10.1007/s00395-016-0563-4), 2016-05-27
Supplement: MOESM1 [file 10205288]

## Sheet: pig
												LEN v LSN			LEI v LSN			OEN v LSN			OEI v LSN			LSI v LSN			OSN v LSN			OSI v LSN			LSI v OEN			LEI v OEN			OSI v OEN			OEI v OEN			LEI v LSI			OSI v LSI
Probeset ID	Accession	ID for IPA	max mean	p-value (treatment)	FDR (treatment)	p-value (pheno)	FDR (pheno)	p-value (state)	FDR (state)	p-value (treatment * pheno * state)	FDR (treatment * pheno * state)	p-value (Exendin * Lean * nor vs. Saline * Lean * nor)	FDR (Exendin * Lean * nor vs. Saline * Lean * nor)	Fold-Change (Exendin * Lean * nor vs. Saline * Lean * nor)	p-value (Exendin * Lean * Isch vs. Saline * Lean * nor)	FDR (Exendin * Lean * Isch vs. Saline * Lean * nor)	Fold-Change (Exendin * Lean * Isch vs. Saline * Lean * nor)	p-value (Exendin * Obese * nor vs. Saline * Lean * nor)	FDR (Exendin * Obese * nor vs. Saline * Lean * nor)	Fold-Change (Exendin * Obese * nor vs. Saline * Lean * nor)	p-value (Exendin * Obese * Isch vs. Saline * Lean * nor)	FDR (Exendin * Obese * Isch vs. Saline * Lean * nor)	Fold-Change (Exendin * Obese * Isch vs. Saline * Lean * nor)	p-value (Saline * Lean * Isch vs. Saline * Lean * nor)	FDR (Saline * Lean * Isch vs. Saline * Lean * nor)	Fold-Change (Saline * Lean * Isch vs. Saline * Lean * nor)	p-value (Saline * Obese * nor vs. Saline * Lean * nor)	FDR (Saline * Obese * nor vs. Saline * Lean * nor)	Fold-Change (Saline * Obese * nor vs. Saline * Lean * nor)	p-value (Saline * Obese * Isch vs. Saline * Lean * nor)	FDR (Saline * Obese * Isch vs. Saline * Lean * nor)	Fold-Change (Saline * Obese * Isch vs. Saline * Lean * nor)	p-value (Saline * Lean * Isch vs. Exendin * Obese * nor)	FDR (Saline * Lean * Isch vs. Exendin * Obese * nor)	Fold-Change (Saline * Lean * Isch vs. Exendin * Obese * nor)	p-value (Exendin * Lean * Isch vs. Exendin * Obese * nor)	FDR (Exendin * Lean * Isch vs. Exendin * Obese * nor)	Fold-Change (Exendin * Lean * Isch vs. Exendin * Obese * nor)	p-value (Saline * Obese * Isch vs. Exendin * Obese * nor)	FDR (Saline * Obese * Isch vs. Exendin * Obese * nor)	Fold-Change (Saline * Obese * Isch vs. Exendin * Obese * nor)	p-value (Exendin * Obese * Isch vs. Exendin * Obese * nor)	FDR (Exendin * Obese * Isch vs. Exendin * Obese * nor)	Fold-Change (Exendin * Obese * Isch vs. Exendin * Obese * nor)	p-value (Exendin * Lean * Isch vs. Saline * Lean * Isch)	FDR (Exendin * Lean * Isch vs. Saline * Lean * Isch)	Fold-Change (Exendin * Lean * Isch vs. Saline * Lean * Isch)	p-value (Saline * Obese * Isch vs. Saline * Lean * Isch)	FDR (Saline * Obese * Isch vs. Saline * Lean * Isch)
ssc-let-7a_st	MIMAT0000062	hsa-let-7a-5p	13.8886	0.165335	0.583792	0.0926769	0.129102	0.601401	0.714189	0.193461	0.293123	0.989231	0.944005	1.00072	0.582681	0.981945	1.02988	0.517214	0.799079	-1.03535	0.0207716	0.140929	-1.13812	0.874064	0.993609	1.00851	0.907213	0.670108	1.00663	0.910731	0.774679	1.00638	0.421358	0.72425	1.04416	0.235397	0.504978	1.06629	0.470468	0.978389	1.04195	0.0843054	0.465133	-1.09926	0.695179	0.893176	1.02119	0.970216	0.715887
ssc-let-7c_st	MIMAT0000064	hsa-let-7c-5p	13.5555	0.800553	0.833108	0.184264	0.18487	0.737395	0.724898	0.291931	0.314564	0.319474	0.888679	1.06688	0.480883	0.981945	1.0467	0.391081	0.749571	-1.05723	0.324008	0.347746	-1.06623	0.468146	0.993609	-1.04811	0.849626	0.661684	-1.01306	0.804153	0.734128	1.01711	0.893198	0.857757	1.0087	0.123677	0.445551	1.10661	0.292866	0.950953	1.07532	0.895475	0.736096	-1.00851	0.157819	0.716076	1.09707	0.353219	0.581526
ssc-let-7e_st	MIMAT0000066	hsa-let-7e-5p	13.2107	0.29926	0.638584	0.335385	0.231871	0.769264	0.724898	0.206584	0.299397	0.584538	0.937124	1.04105	0.823837	0.981945	1.01648	0.142654	0.632141	-1.11579	0.968119	0.563045	1.00294	0.132872	0.993609	-1.11899	0.628289	0.615554	-1.03848	0.455543	0.657089	-1.06009	0.968885	0.857757	-1.00287	0.0938953	0.445551	1.13418	0.512145	0.978389	1.05254	0.132638	0.540707	1.11907	0.0869928	0.716076	1.13743	0.489027	0.625694
ssc-let-7f_st	MIMAT0000067	hsa-let-7f-5p	10.8036	0.0949869	0.576119	0.131686	0.14808	0.84501	0.734915	0.311418	0.314564	0.607375	0.937124	-1.10203	0.686463	0.981945	1.07925	0.261102	0.632141	-1.239	0.0286595	0.140929	-1.53742	0.944987	0.993609	-1.0131	0.933529	0.670108	1.01683	0.984174	0.776351	-1.00398	0.290588	0.644344	1.22297	0.130912	0.445551	1.33718	0.297656	0.950953	1.23409	0.257859	0.635529	-1.24085	0.636691	0.893176	1.09339	0.96393	0.714719
ssc-let-7g_st	MIMAT0000121	mmu-let-7g-5p	10.6963	0.181989	0.583792	0.082843	0.12273	0.894651	0.74168	0.28803	0.314564	0.480626	0.924695	-1.11986	0.564374	0.981945	1.09678	0.209353	0.632141	-1.22549	0.0288187	0.140929	-1.43902	0.750256	0.993609	-1.05224	0.875624	0.66443	-1.02689	0.705188	0.725273	-1.06632	0.343911	0.699099	1.16465	0.0718879	0.445551	1.34409	0.414449	0.950953	1.14927	0.318972	0.658343	-1.17424	0.373169	0.768721	1.15407	0.93749	0.714719
ssc-let-7i_st	MIMAT0000122	mmu-let-7i-5p	6.27329	0.286326	0.638584	0.0262018	0.0643553	0.578047	0.714189	0.123904	0.277334	0.496292	0.924695	1.29816	0.465107	0.981945	1.32359	0.483573	0.79005	-1.30836	0.0168284	0.140929	-2.60963	0.774788	0.993609	1.1156	0.930655	0.670108	-1.0359	0.829851	0.737865	1.09102	0.326224	0.674946	1.4596	0.157634	0.448857	1.73173	0.382891	0.950953	1.42745	0.0784007	0.464597	-1.99458	0.655092	0.893176	1.18644	0.956168	0.714719
ssc-miR-1_st	MIMAT0000123	mmu-miR-1a-3p	8.82427	0.583368	0.746766	0.143567	0.155809	0.890289	0.74168	0.868426	0.445347	0.57705	0.937124	-1.17609	0.920278	0.981945	1.02946	0.184815	0.632141	-1.47762	0.41003	0.371763	-1.27169	0.942204	0.993609	-1.02125	0.774625	0.64198	-1.09216	0.293912	0.629755	-1.38533	0.20891	0.626353	1.44687	0.155173	0.448857	1.52115	0.834027	0.979981	1.06662	0.605666	0.69219	1.16194	0.863004	0.893176	1.05134	0.325613	0.581526
ssc-miR-100_st	MIMAT0000098	hsa-miR-100-5p	11.8063	0.286151	0.638584	0.118923	0.141144	0.949178	0.751824	0.0952819	0.277334	0.606488	0.937124	1.02621	0.847254	0.981945	1.0097	0.284096	0.661731	1.0557	0.623989	0.456389	-1.02492	0.952458	0.993609	1.00299	0.483746	0.588336	1.03808	0.0150123	0.332444	1.14568	0.310984	0.661389	-1.05255	0.377183	0.621242	-1.04555	0.131166	0.894707	1.08524	0.123226	0.540707	-1.082	0.894161	0.893176	1.00669	0.0171483	0.317509
ssc-miR-101_st	MIMAT0000099	hsa-miR-101-3p	1.23883	0.12875	0.576119	0.759362	0.389416	0.559039	0.714189	0.946668	0.466866	0.254331	0.866452	-1.15895	0.322018	0.981945	-1.13634	0.519568	0.799079	-1.08623	0.407556	0.371763	-1.11251	0.842731	0.993609	-1.02573	0.728032	0.637911	1.04839	0.567884	0.657089	-1.08086	0.654837	0.812965	1.05899	0.724885	0.789682	-1.04612	0.970831	0.979981	1.00498	0.8519	0.73386	-1.02419	0.426127	0.787032	-1.10783	0.700127	0.662915
ssc-miR-103_st	MIMAT0000101	hsa-miR-103a-3p	12.087	0.0498523	0.55446	0.753894	0.388748	0.846774	0.734915	0.404183	0.357684	0.667227	0.937124	-1.03333	0.72959	0.981945	1.0267	0.740522	0.858953	1.02556	0.28925	0.327531	1.08487	0.316066	0.993609	-1.08003	0.655545	0.625356	-1.03674	0.200642	0.574688	-1.11048	0.185896	0.626353	-1.10763	0.98839	0.806576	1.00111	0.114919	0.894707	-1.13887	0.462299	0.666377	1.05783	0.18131	0.716076	1.10886	0.730867	0.662915
ssc-miR-105-1_st	MIMAT0000102	hsa-miR-105-5p	1.07979	0.475004	0.718284	0.306506	0.225043	0.0557485	0.649253	0.19786	0.295164	0.870657	0.937124	1.01416	0.855276	0.981945	1.01588	0.856588	0.871116	1.01573	0.571445	0.444503	-1.05023	0.4792	0.993609	-1.06329	0.0304765	0.383882	1.22915	0.820565	0.737865	-1.021	0.375906	0.704824	-1.08002	0.998665	0.806614	1.00014	0.691501	0.978389	-1.03707	0.456438	0.666377	-1.06676	0.375022	0.768721	1.08018	0.658269	0.662915
ssc-miR-106a_st	MIMAT0000103	hsa-miR-106a-5p	9.80345	0.39336	0.682298	0.00270455	0.0294488	0.546295	0.714189	0.717156	0.427472	0.447235	0.924695	-1.06601	0.892771	0.981945	-1.01135	0.180161	0.632141	-1.12064	0.0398633	0.156598	-1.19523	0.463771	0.993609	1.06354	0.0663669	0.383882	-1.18262	0.208656	0.574688	-1.11977	0.0429019	0.482647	1.19184	0.225939	0.504978	1.10807	0.992992	0.979981	1.00078	0.443646	0.666377	-1.06656	0.386873	0.768721	-1.07561	0.0563996	0.317509
ssc-miR-107_st	MIMAT0000104	hsa-miR-107	11.6899	0.0205174	0.55446	0.239464	0.205045	0.5764	0.714189	0.582055	0.395221	0.661396	0.937124	1.02673	0.746196	0.981945	1.01967	0.0801147	0.632141	1.11406	0.0802658	0.196883	1.114	0.892041	0.993609	-1.0082	0.853344	0.661684	1.01186	0.506535	0.657089	-1.04344	0.0607999	0.483603	-1.12319	0.148065	0.445551	-1.09257	0.0238665	0.443071	-1.16246	0.999246	0.768651	-1.00006	0.646326	0.893176	1.02803	0.590969	0.662915
ssc-miR-10a_st	MIMAT0000253	hsa-miR-10a-5p	3.03836	0.411618	0.687026	0.0512953	0.0903146	0.352786	0.714189	0.159288	0.293123	0.0390713	0.593583	-1.40963	0.62639	0.981945	1.0814	0.265475	0.634382	-1.19787	0.0902378	0.196883	-1.32119	0.948178	0.993609	1.01048	0.205268	0.51317	-1.24422	0.160336	0.531457	-1.275	0.239428	0.626353	1.21042	0.114282	0.445551	1.29538	0.714155	0.978389	-1.06439	0.542628	0.69219	-1.10295	0.672911	0.893176	1.07019	0.143708	0.428306
ssc-miR-10b_st	MIMAT0000208	mmu-miR-10b-5p	5.893	0.0361892	0.55446	0.117972	0.141144	0.0523097	0.649253	0.974994	0.475607	0.373403	0.924695	-1.40849	0.946061	0.981945	1.0262	0.0654715	0.632141	-2.06421	0.280451	0.327531	-1.51685	0.370824	0.993609	1.41114	0.427461	0.588336	-1.38186	0.563602	0.657089	1.26464	0.0084188	0.303077	2.91289	0.0569175	0.398422	2.11829	0.0235128	0.443071	2.61049	0.422715	0.666377	1.36085	0.407367	0.770059	-1.37511	0.78701	0.679691
ssc-miR-122_st	MIMAT0000246	mmu-miR-122-5p	2.80042	0.468098	0.71665	0.00395989	0.0294488	0.662131	0.720686	0.136439	0.279355	0.575495	0.937124	-1.17819	0.520121	0.981945	1.20743	0.0646099	0.632141	-1.74307	0.00688798	0.10332	-2.31744	0.404737	0.993609	-1.27733	0.076134	0.383882	-1.75826	0.69006	0.721794	-1.13167	0.291663	0.644344	1.36462	0.0154043	0.323489	2.10464	0.169964	0.91338	1.54027	0.333286	0.658343	-1.32952	0.145119	0.716076	1.54228	0.696272	0.662915
ssc-miR-124a_st	MIMAT0000134	mmu-miR-124-3p	1.20356	0.968222	0.843961	0.780342	0.393686	0.817733	0.730934	0.680189	0.424616	0.831553	0.937124	-1.03235	0.831833	0.981945	-1.03229	0.801091	0.858953	-1.03843	0.754345	0.508547	-1.04797	0.419461	0.993609	-1.12914	0.49761	0.588336	-1.1141	0.55641	0.657089	1.09813	0.576653	0.753171	-1.08735	0.968382	0.806576	1.00595	0.410605	0.950953	1.14034	0.951277	0.753487	-1.00918	0.550117	0.887505	1.09382	0.181894	0.474906
ssc-miR-125a_st	MIMAT0000135	mmu-miR-125a-5p	11.1196	0.534924	0.746766	0.331813	0.231871	0.805922	0.728517	0.191898	0.293123	0.0337622	0.582516	1.3291	0.187075	0.981945	1.18845	0.0395799	0.632141	1.31676	0.269789	0.327531	1.15463	0.11736	0.993609	1.22898	0.14877	0.490266	1.22264	0.032864	0.395727	1.35449	0.593514	0.76858	-1.07143	0.429013	0.641616	-1.10796	0.83642	0.979981	1.02865	0.312387	0.658343	-1.14042	0.794946	0.893176	-1.0341	0.478958	0.625694
ssc-miR-125b_st	MIMAT0000136	mmu-miR-125b-5p	13.1785	0.631564	0.746766	0.551237	0.308077	0.747017	0.724898	0.0389019	0.176827	0.670446	0.937124	1.01624	0.757098	0.981945	-1.01177	0.224602	0.632141	1.04756	0.364045	0.361037	-1.03514	0.160528	0.993609	1.0554	0.321131	0.549486	-1.04091	0.323021	0.629755	1.04075	0.843643	0.857757	1.00748	0.131127	0.445551	-1.05989	0.870655	0.979981	-1.00655	0.0387504	0.387504	-1.08438	0.0901586	0.716076	-1.06782	0.727448	0.662915
ssc-miR-126_st	MIMAT0000138	mmu-miR-126a-3p	12.4583	0.565812	0.746766	0.00079893	0.0186417	0.440719	0.714189	0.322295	0.322295	0.50214	0.926847	1.05327	0.52757	0.981945	1.05004	0.873237	0.871116	-1.01237	0.0213888	0.140929	-1.20383	0.516493	0.993609	1.05144	0.146258	0.490266	-1.12848	0.156372	0.531457	-1.12504	0.420123	0.72425	1.06445	0.429957	0.641616	1.06303	0.202781	0.950953	-1.11129	0.0307496	0.373736	-1.18912	0.986262	0.893176	-1.00133	0.0468759	0.317509
ssc-miR-127_st	MIMAT0000139	mmu-miR-127-3p	4.39404	0.389844	0.682298	0.00150768	0.0281434	0.468291	0.714189	0.497925	0.381147	0.900825	0.944005	1.06082	0.884818	0.981945	-1.07104	0.12082	0.632141	-2.11713	0.0167882	0.140929	-3.28622	0.163329	0.993609	-1.95678	0.0124332	0.311319	-3.76282	0.119761	0.523723	-2.22093	0.867982	0.857757	1.08194	0.157275	0.448857	1.97669	0.924106	0.979981	-1.04903	0.356767	0.663753	-1.55221	0.209344	0.716076	1.82699	0.801127	0.683951
ssc-miR-1277_st	MIMAT0005933	hsa-miR-1277-3p	1.12026	0.137726	0.576119	0.0991339	0.134094	0.538793	0.714189	0.100342	0.277334	0.482198	0.924695	-1.06418	0.676631	0.981945	1.0375	0.284113	0.661731	1.10003	0.448335	0.380256	-1.06946	0.889475	0.993609	1.01233	0.586004	0.601651	1.05237	0.0278546	0.395727	1.239	0.349459	0.699099	-1.08663	0.508316	0.689392	-1.06026	0.20923	0.950953	1.12634	0.0728748	0.464597	-1.17643	0.780625	0.893176	1.02487	0.0372874	0.317509
ssc-miR-128_st	MIMAT0000140	mmu-miR-128-3p	7.43488	0.932105	0.843961	0.59966	0.325397	0.330162	0.714189	0.417483	0.359899	0.528964	0.937124	1.06816	0.938608	0.981945	-1.00807	0.914958	0.871116	1.01121	0.173555	0.275696	-1.15523	0.520055	0.993609	-1.0697	0.734698	0.637911	-1.03827	0.66502	0.705252	1.04918	0.454006	0.72425	-1.08169	0.854195	0.806576	-1.01937	0.739377	0.978389	1.03755	0.143628	0.540707	-1.16818	0.570749	0.893176	1.06114	0.301652	0.580394
ssc-miR-1285_st	MIMAT0005876	hsa-miR-1285-3p	11.3532	0.0955943	0.576119	0.226844	0.199737	0.674467	0.724898	0.61837	0.403462	0.572527	0.937124	-1.09588	0.521135	0.981945	-1.1098	0.314019	0.691969	-1.17859	0.934667	0.555385	-1.01335	0.549887	0.993609	-1.10191	0.572902	0.601651	1.10188	0.258714	0.629755	1.21646	0.678022	0.813627	1.06959	0.710458	0.789682	1.06198	0.042689	0.622681	1.4337	0.354049	0.663753	1.16306	0.96483	0.893176	-1.00716	0.0954687	0.386066
ssc-miR-129a_st	MIMAT0000544	mmu-miR-129-2-3p	1.71844	0.241728	0.61096	0.271471	0.216045	0.276802	0.714189	0.268586	0.308719	0.188008	0.774772	-1.2285	0.0114809	0.981945	-1.50885	0.0591696	0.632141	-1.34935	0.0332979	0.142705	-1.4061	0.0808489	0.993609	-1.31783	0.0225359	0.383882	-1.47654	0.192941	0.574688	-1.24084	0.878086	0.857757	1.02391	0.470203	0.669038	-1.11821	0.608677	0.978389	1.08744	0.789243	0.723232	-1.04206	0.3826	0.768721	-1.14495	0.712855	0.662915
ssc-miR-1306-3p_st	MIMAT0009411	mmu-miR-1306-3p	5.85338	0.823297	0.837128	0.190591	0.18487	0.981834	0.762589	0.136884	0.279355	0.162581	0.768505	1.3313	0.660229	0.981945	1.0928	0.654653	0.858953	1.09451	0.311027	0.342415	-1.22871	0.573274	0.993609	1.12056	0.433337	0.588336	-1.18337	0.305632	0.629755	1.24727	0.907121	0.857757	1.0238	0.993817	0.806576	-1.00156	0.542374	0.978389	1.13957	0.148694	0.540707	-1.34484	0.900985	0.893176	-1.0254	0.617023	0.662915
ssc-miR-1306-5p_st	MIMAT0022726	hsa-miR-1306-5p	1.38916	0.903569	0.843961	0.539004	0.30613	0.963122	0.753982	0.642074	0.411586	0.819646	0.937124	1.03354	0.970874	0.981945	-1.0053	0.677681	0.858953	1.06205	0.894332	0.542019	1.0194	0.293907	0.993609	1.1656	0.985638	0.694456	1.00277	0.580526	0.664334	-1.08871	0.521545	0.740794	1.0975	0.651292	0.770542	-1.06768	0.347511	0.950953	-1.15627	0.777023	0.723232	-1.04184	0.277894	0.716076	-1.17177	0.127865	0.428306
ssc-miR-1307_st	MIMAT0005951	hsa-miR-1307-3p	6.39536	0.372752	0.676323	0.375263	0.243226	0.126958	0.649253	0.243347	0.30352	0.770309	0.937124	1.05817	0.130364	0.981945	-1.34782	0.980875	0.883711	-1.00465	0.191097	0.283107	-1.29265	0.181884	0.993609	-1.2999	0.0460479	0.383882	-1.52752	0.39585	0.649754	-1.19166	0.189505	0.626353	-1.29388	0.136217	0.445551	-1.34158	0.40832	0.950953	-1.18614	0.199014	0.602084	-1.28667	0.851659	0.893176	-1.03686	0.67235	0.662915
ssc-miR-130a_st	MIMAT0000141	mmu-miR-130a-3p	7.70646	0.210729	0.583792	0.869981	0.423594	0.0994625	0.649253	0.21871	0.30352	0.717832	0.937124	1.0671	0.906117	0.981945	1.0214	0.716015	0.858953	1.06757	0.0709753	0.191025	-1.39557	0.98705	0.994275	-1.00292	0.223783	0.531943	1.26437	0.769041	0.726153	1.05755	0.703973	0.828203	-1.07068	0.80559	0.800823	-1.0452	0.960502	0.979981	-1.00947	0.0327019	0.373736	-1.48986	0.893274	0.893176	1.02438	0.7574	0.672564
ssc-miR-130b_st	MIMAT0000387	mmu-miR-130b-3p	8.13863	0.0618274	0.571143	0.030112	0.067452	0.585232	0.714189	0.238673	0.30352	0.602332	0.937124	-1.0711	0.885079	0.981945	1.01919	0.826275	0.858953	-1.0293	0.115485	0.227187	-1.23543	0.145235	0.993609	-1.21537	0.010244	0.311319	-1.4609	0.0963199	0.522869	-1.26808	0.212418	0.626353	-1.18078	0.716065	0.789682	1.04905	0.141993	0.894707	-1.23198	0.171895	0.572983	-1.20026	0.111189	0.716076	1.2387	0.76106	0.672564
ssc-miR-133a-3p_st	MIMAT0000145	mmu-miR-133a-3p	11.4782	0.540492	0.746766	0.408328	0.253455	0.161766	0.649253	0.051612	0.216773	0.0217249	0.582516	1.16294	0.391729	0.981945	-1.05567	0.0844638	0.632141	1.11767	0.436844	0.380256	1.05036	0.293185	0.993609	1.06898	0.479491	0.588336	1.04849	0.344404	0.629755	1.06558	0.480411	0.726673	-1.04555	0.0126154	0.323489	-1.1799	0.476029	0.978389	-1.04888	0.327018	0.658343	-1.06409	0.0619632	0.716076	-1.12849	0.961972	0.714719
ssc-miR-133a-5p_st	MIMAT0026478	hsa-miR-133a-5p	8.19586	0.593532	0.746766	0.000665142	0.0186417	0.0615762	0.649253	0.615293	0.403462	0.305605	0.874739	-1.12543	0.329089	0.981945	-1.11905	0.0104822	0.632141	-1.36284	0.000597446	0.0179234	-1.54487	0.0445182	0.993609	-1.2684	0.040542	0.383882	-1.29359	0.00621857	0.332444	-1.4246	0.531227	0.741247	1.07446	0.0923833	0.445551	1.21786	0.715059	0.978389	-1.04531	0.277596	0.653168	-1.13357	0.277944	0.716076	1.13346	0.341875	0.581526
ssc-miR-133b_st	MIMAT0000769	mmu-miR-133b-3p	11.5185	0.273613	0.638584	0.605542	0.326689	0.30782	0.714189	0.127735	0.277685	0.0353934	0.582516	1.17026	0.641219	0.981945	-1.03416	0.0894826	0.632141	1.13341	0.363683	0.361037	1.06803	0.330204	0.993609	1.07318	0.728617	0.637911	1.02686	0.485229	0.657089	1.05494	0.450159	0.72425	-1.05612	0.0336981	0.357963	-1.17213	0.350759	0.950953	-1.07438	0.411691	0.666377	-1.06121	0.154541	0.716076	-1.10984	0.82235	0.686798
ssc-miR-1343_st	MIMAT0019776	hsa-miR-1343-3p	4.90423	0.923484	0.843961	0.378705	0.243764	0.114303	0.649253	0.136587	0.279355	0.460904	0.924695	1.32852	0.840225	0.981945	1.08041	0.840998	0.869347	-1.08	0.0502185	0.160003	-2.17251	0.16551	0.993609	-1.71696	0.807942	0.647246	-1.10398	0.859328	0.746742	1.07477	0.232326	0.626353	-1.58979	0.687823	0.789682	1.16684	0.714313	0.978389	1.16075	0.0760086	0.464597	-2.01159	0.114673	0.716076	1.85502	0.139263	0.428306
ssc-miR-139-5p_st	MIMAT0000250	hsa-miR-139-5p	8.5145	0.0379425	0.55446	0.0727952	0.115156	0.603755	0.714189	0.249537	0.30352	0.0106438	0.582516	1.26984	0.416076	0.981945	1.07499	0.0241597	0.632141	1.23151	0.064447	0.184134	1.18334	0.88998	0.993609	1.01231	0.331534	0.549486	1.09615	0.0485947	0.438702	1.21072	0.0330031	0.456967	-1.21653	0.131627	0.445551	-1.14559	0.855991	0.979981	-1.01717	0.652433	0.711715	-1.0407	0.498512	0.825601	1.06192	0.0638527	0.334676
ssc-miR-140_st	MIMAT0000151	mmu-miR-140-5p	2.78808	0.158399	0.583792	0.00914362	0.0387911	0.37291	0.714189	0.467798	0.371269	0.491623	0.924695	1.26421	0.315458	0.981945	-1.41024	0.175366	0.632141	-1.59578	0.0243075	0.140929	-2.22263	0.550617	0.993609	1.22539	0.368003	0.574225	-1.38602	0.492665	0.657089	-1.28154	0.0555845	0.483603	1.95546	0.716145	0.789682	1.13156	0.543828	0.978389	1.2452	0.332992	0.658343	-1.39282	0.114719	0.716076	-1.7281	0.21607	0.503651
ssc-miR-140-star_st	MIMAT0000152	mmu-miR-140-3p	10.7759	0.903823	0.843961	0.246375	0.207024	0.652338	0.714891	0.00742487	0.0928109	0.0641892	0.720774	-1.37909	0.0992368	0.981945	-1.32917	0.963265	0.881795	1.0078	0.279308	0.327531	1.20236	0.956366	0.993609	1.00927	0.996432	0.694628	-1.0008	0.040271	0.436269	-1.46277	0.993092	0.859406	1.00146	0.0907439	0.445551	-1.33954	0.0366242	0.575312	-1.47418	0.299685	0.658343	1.19306	0.0892178	0.716076	-1.34149	0.0359726	0.317509
ssc-miR-142-5p_st	MIMAT0000154	mmu-miR-142a-5p	1.00941	0.374624	0.676323	0.0911642	0.128919	0.841248	0.734915	0.497253	0.381147	0.508811	0.930465	-1.05867	0.380787	0.981945	1.07879	0.245481	0.632141	1.10627	0.201028	0.290643	1.11791	0.814942	0.993609	-1.02033	0.325775	0.549486	1.09455	0.976669	0.774679	1.00267	0.165712	0.626353	-1.12876	0.769997	0.791632	-1.02547	0.285542	0.950953	-1.10332	0.90312	0.736096	1.01052	0.26923	0.716076	1.10073	0.802676	0.683951
ssc-miR-143-3p_st	MIMAT0000247	mmu-miR-143-3p	11.9344	0.538554	0.746766	0.109838	0.140432	0.0917693	0.649253	0.0142669	0.113819	0.980565	0.944005	-1.00268	0.655211	0.981945	-1.0503	0.159571	0.632141	-1.16991	0.985322	0.568455	-1.00202	0.689311	0.993609	-1.0449	0.523507	0.588336	1.07734	0.00250034	0.307411	-1.46346	0.307271	0.661389	1.11964	0.329472	0.567275	1.11388	0.0618304	0.770396	-1.25092	0.164831	0.572983	1.16755	0.962548	0.893176	-1.00517	0.00659672	0.307934
ssc-miR-143-5p_st	MIMAT0004599	hsa-miR-143-5p	4.10575	0.625356	0.746766	0.0168813	0.0559348	0.0214966	0.573242	0.841796	0.438013	0.463767	0.924695	1.32822	0.509467	0.981945	-1.29091	0.743702	0.858953	-1.13452	0.0533343	0.160003	-2.15826	0.810541	0.993609	-1.09691	0.52203	0.588336	-1.30056	0.0340934	0.395727	-2.46134	0.930354	0.857757	1.03428	0.737976	0.789682	-1.13785	0.0658354	0.770396	-2.16951	0.103052	0.529361	-1.90236	0.673301	0.893176	-1.17686	0.0555014	0.317509
ssc-miR-145_st	MIMAT0000157	mmu-miR-145a-5p	12.4246	0.479505	0.718945	0.36019	0.240203	0.7628	0.724898	0.856201	0.441341	0.602883	0.937124	1.05841	0.79651	0.981945	-1.02849	0.712519	0.858953	1.04098	0.273007	0.327531	1.12813	0.837207	0.993609	-1.02263	0.686447	0.629967	1.04779	0.960444	0.774679	1.00574	0.566748	0.753171	-1.06454	0.532074	0.703191	-1.07064	0.765718	0.979981	-1.03503	0.462267	0.666377	1.08372	0.958154	0.893176	-1.00573	0.807804	0.683951
ssc-miR-146a_st	MIMAT0016989	mmu-miR-146a-3p	1.02185	0.00772743	0.55446	0.327279	0.23141	0.191836	0.65306	0.621331	0.403462	0.428247	0.924695	1.08107	0.789904	0.981945	1.02644	0.0222916	0.632141	1.26356	0.443192	0.380256	1.07835	0.439947	0.993609	-1.07893	0.626861	0.615554	-1.05187	0.762229	0.726153	-1.03193	0.00330018	0.285851	-1.3633	0.0405025	0.357963	-1.23101	0.0151096	0.443071	-1.30391	0.11294	0.53333	-1.17175	0.301421	0.723189	1.10746	0.668399	0.662915
ssc-miR-146b_st	MIMAT0002809	hsa-miR-146b-5p	1.54732	0.87988	0.843961	0.291827	0.218129	0.398183	0.714189	0.56026	0.395221	0.173684	0.768505	1.31093	0.515569	0.981945	1.13636	0.975048	0.883711	1.00615	0.582957	0.445572	-1.11387	0.673595	0.993609	1.08615	0.440429	0.588336	1.17481	0.969534	0.774679	-1.00797	0.696484	0.824784	1.07952	0.535764	0.703191	1.12942	0.94604	0.979981	-1.01416	0.561849	0.69219	-1.12071	0.817652	0.893176	1.04622	0.663402	0.662915
ssc-miR-148a_st	MIMAT0000243	hsa-miR-148a-3p	3.59626	0.650461	0.753708	0.00493817	0.0294488	0.627974	0.714189	0.8153	0.438013	0.562447	0.937124	-1.25439	0.962062	0.981945	1.01873	0.216423	0.632141	-1.63005	0.0525662	0.160003	-2.18373	0.752087	0.993609	1.13129	0.0686269	0.383882	-2.17102	0.27049	0.629755	-1.58529	0.12425	0.626353	1.84406	0.199916	0.501282	1.66058	0.946367	0.979981	1.02823	0.455716	0.666377	-1.33967	0.788372	0.893176	-1.11049	0.16499	0.455971
ssc-miR-148b_st	MIMAT0000580	mmu-miR-148b-3p	4.29882	0.298725	0.638584	0.0522535	0.0903146	0.292729	0.714189	0.651812	0.415167	0.391989	0.924695	1.49998	0.646162	0.981945	1.24172	0.389247	0.749571	-1.50356	0.200513	0.290643	-1.84229	0.243725	0.993609	-1.74211	0.43936	0.588336	-1.47409	0.348604	0.629755	-1.60235	0.754601	0.840485	-1.15866	0.191137	0.493027	1.867	0.8986	0.979981	-1.0657	0.666512	0.711715	-1.22528	0.108785	0.716076	2.16321	0.867009	0.689446
ssc-miR-149_st	MIMAT0000159	mmu-miR-149-5p	7.78449	0.0677922	0.571143	0.252865	0.207024	0.207649	0.654565	0.17851	0.293123	0.032311	0.582516	1.34496	0.999331	0.999331	-1.00011	0.129614	0.632141	1.22845	0.466135	0.391163	1.10237	0.397587	0.993609	-1.11997	0.916836	0.670108	1.01486	0.202876	0.574688	1.19998	0.0219553	0.439106	-1.37583	0.129414	0.445551	-1.22859	0.868122	0.979981	-1.02373	0.418536	0.666377	-1.11438	0.398047	0.770059	1.11985	0.0432174	0.317509
ssc-miR-151-3p_st	MIMAT0000757	hsa-miR-151a-3p	8.42032	0.587647	0.746766	0.541194	0.30613	0.120562	0.649253	0.00730089	0.0928109	0.978093	0.944005	1.00168	0.946057	0.981945	-1.00415	0.611399	0.846316	1.03167	0.00437966	0.0750799	-1.20583	0.181929	0.993609	-1.08653	0.383393	0.579083	-1.05864	0.442398	0.657089	1.05142	0.0698538	0.483603	-1.12094	0.56513	0.721361	-1.03596	0.770501	0.979981	1.01914	0.00114479	0.0710496	-1.24402	0.204077	0.716076	1.08203	0.0474746	0.317509
ssc-miR-151-5p_st	MIMAT0004536	mmu-miR-151-5p	11.6582	0.839258	0.843961	0.0747182	0.116228	0.425105	0.714189	0.190235	0.293123	0.196682	0.776895	-1.08655	0.862727	0.981945	1.01102	0.120841	0.632141	-1.10558	0.0254479	0.140929	-1.15934	0.0765719	0.993609	-1.12222	0.29399	0.549486	-1.07382	0.118328	0.523723	-1.11318	0.813847	0.857757	-1.01505	0.086726	0.445551	1.11777	0.918924	0.979981	-1.00687	0.456062	0.666377	-1.04862	0.0536636	0.716076	1.13459	0.904252	0.701257
ssc-miR-152_st	MIMAT0000162	mmu-miR-152-3p	9.38926	0.809926	0.833108	0.340059	0.231889	0.937562	0.750819	0.144323	0.282986	0.101515	0.724422	-1.33773	0.366463	0.981945	-1.17109	0.191838	0.632141	-1.25857	0.861052	0.532609	-1.03087	0.451654	0.993609	-1.14036	0.18916	0.509502	-1.2782	0.0291153	0.395727	-1.51992	0.571151	0.753171	1.10366	0.678733	0.789682	1.0747	0.309944	0.950953	-1.20765	0.255717	0.635529	1.22088	0.878342	0.893176	-1.02695	0.126273	0.428306
ssc-miR-15a_st	MIMAT0000068	hsa-miR-15a-5p	6.05723	0.158964	0.583792	0.0389295	0.0773069	0.265043	0.714189	0.734435	0.42794	0.931822	0.944005	-1.03428	0.731551	0.981945	-1.14484	0.134769	0.632141	-1.82286	0.0217749	0.140929	-2.5739	0.810159	0.993609	-1.09929	0.920426	0.670108	-1.04262	0.324383	0.629755	-1.51457	0.20531	0.626353	1.65821	0.243091	0.504978	1.59224	0.657964	0.978389	1.20355	0.384132	0.666377	-1.41201	0.917917	0.893176	-1.04143	0.445303	0.615328
ssc-miR-15b_st	MIMAT0000124	mmu-miR-15b-5p	9.57254	0.570353	0.746766	0.00452952	0.0294488	0.607193	0.714189	0.074293	0.265332	0.175311	0.768505	1.25965	0.0689567	0.981945	1.36845	0.468042	0.789586	-1.13	0.0779912	0.196883	-1.35453	0.241489	0.993609	1.21981	0.912554	0.670108	1.01972	0.585156	0.66495	1.10222	0.0631222	0.483603	1.37839	0.0136187	0.323489	1.54636	0.222843	0.950953	1.24551	0.284445	0.658343	-1.19869	0.494576	0.825601	1.12186	0.569757	0.662915
ssc-miR-16_st	MIMAT0000069	hsa-miR-16-5p	11.9067	0.0837767	0.576119	0.000645812	0.0186417	0.678397	0.724898	0.350968	0.334256	0.965721	0.944005	1.0039	0.628032	0.981945	1.04489	0.0852135	0.632141	-1.17314	0.0404545	0.156598	-1.21183	0.0746421	0.993609	1.18021	0.822425	0.648107	-1.02178	0.226988	0.604682	-1.12453	0.0010525	0.18945	1.38454	0.0305902	0.357963	1.2258	0.659708	0.978389	1.04323	0.720067	0.711715	-1.03299	0.184776	0.716076	-1.1295	0.00574288	0.307934
ssc-miR-17-3p_st	MIMAT0000071	hsa-miR-17-3p	4.12406	0.879009	0.843961	0.0060787	0.0333733	0.779404	0.724898	0.579593	0.395221	0.85933	0.937124	1.07897	0.753205	0.981945	-1.14444	0.253634	0.632141	-1.64027	0.354561	0.361037	-1.49153	0.441266	0.993609	1.39348	0.297492	0.549486	-1.61306	0.0453449	0.438702	-2.56464	0.0612867	0.483603	2.2857	0.403922	0.635134	1.43326	0.32956	0.950953	-1.56354	0.824596	0.728058	1.09973	0.281061	0.716076	-1.59475	0.00834294	0.307934
ssc-miR-17-5p_st	MIMAT0000070	hsa-miR-17-5p	10.4549	0.956727	0.843961	0.0206835	0.0584989	0.356361	0.714189	0.751827	0.42794	0.983452	0.944005	1.00207	0.914992	0.981945	-1.01068	0.259004	0.632141	-1.12027	0.708143	0.494054	-1.03801	0.304025	0.993609	1.10874	0.198473	0.509502	-1.1476	0.285501	0.629755	-1.12058	0.0359365	0.462041	1.24208	0.305323	0.551551	1.10843	0.997872	0.979981	-1.00028	0.445789	0.666377	1.07925	0.25785	0.716076	-1.12058	0.0468188	0.317509
ssc-miR-181a_st	MIMAT0000210	mmu-miR-181a-5p	10.2538	0.0658586	0.571143	0.317754	0.22639	0.119763	0.649253	0.184234	0.293123	0.0233894	0.582516	1.37307	0.491921	0.981945	1.09674	0.527677	0.799079	1.0885	0.514189	0.416691	-1.09157	0.353853	0.993609	-1.13313	0.792513	0.64198	-1.03807	0.742926	0.726153	1.0477	0.124429	0.626353	-1.23341	0.95509	0.806576	1.00757	0.787926	0.979981	-1.03895	0.203788	0.602084	-1.18817	0.111972	0.716076	1.24274	0.232381	0.506683
ssc-miR-181b_st	MIMAT0000257	hsa-miR-181b-5p	9.53338	0.316149	0.642921	0.216781	0.198362	0.256457	0.714189	0.0349632	0.176827	0.157127	0.768505	1.21398	0.834179	0.981945	1.02862	0.803569	0.858953	1.0341	0.0895569	0.196883	-1.2642	0.219587	0.993609	-1.18239	0.196327	0.509502	-1.20598	0.50682	0.657089	1.0999	0.142839	0.626353	-1.22271	0.968541	0.806576	-1.00533	0.66649	0.978389	1.06363	0.0540102	0.454822	-1.30731	0.153322	0.716076	1.21623	0.0735988	0.349594
ssc-miR-181c_st	MIMAT0000258	hsa-miR-181c-5p	5.86079	0.367478	0.676323	0.125915	0.143318	0.0136061	0.524579	0.181211	0.293123	0.0722414	0.720774	1.94417	0.120329	0.981945	-1.76915	0.923194	0.871116	-1.0353	0.164403	0.274006	-1.66288	0.405924	0.993609	-1.35091	0.242407	0.532561	-1.57038	0.336204	0.629755	-1.44758	0.461634	0.72425	-1.30485	0.143641	0.445551	-1.70883	0.382824	0.950953	-1.39822	0.194182	0.602084	-1.60618	0.455593	0.818399	-1.3096	0.856326	0.688685
ssc-miR-181d-3p_st	MIMAT0017264	mmu-miR-181d-3p	1.63525	0.0263718	0.55446	0.823692	0.408925	0.264118	0.714189	0.0346554	0.176827	0.00658762	0.582516	-1.39878	0.00262837	0.546702	-1.45801	0.00243633	0.448285	-1.4629	0.153978	0.263962	-1.18306	0.041228	0.993609	-1.27782	0.281825	0.549486	-1.14294	0.0113319	0.332444	-1.3895	0.248505	0.626353	1.14484	0.976946	0.806576	1.00335	0.675858	0.978389	1.05282	0.0746019	0.464597	1.23654	0.260155	0.716076	-1.14101	0.497167	0.625694
ssc-miR-181d-5p_st	MIMAT0002821	hsa-miR-181d-5p	7.33599	0.922363	0.843961	0.393305	0.247348	0.15665	0.649253	0.0117399	0.106727	0.408515	0.924695	1.1212	0.570613	0.981945	1.0814	0.303762	0.690028	1.15349	0.0184376	0.140929	-1.40515	0.517701	0.993609	-1.09345	0.625724	0.615554	-1.07394	0.382357	0.640546	1.13693	0.0992959	0.558539	-1.26128	0.639717	0.766713	-1.06666	0.921075	0.979981	-1.01457	0.00133218	0.0710496	-1.62083	0.228968	0.716076	1.18246	0.143098	0.428306
ssc-miR-183_st	MIMAT0000212	mmu-miR-183-5p	1.24915	0.987855	0.843961	0.410053	0.253455	0.699498	0.724898	0.119609	0.277334	0.300383	0.874739	1.10592	0.568619	0.981945	-1.05662	0.789716	0.858953	1.02604	0.58226	0.445572	1.05457	0.099061	0.993609	1.1766	0.710674	0.637911	1.03868	0.476225	0.657089	-1.07585	0.162162	0.626353	1.14674	0.40452	0.635134	-1.08413	0.337297	0.950953	-1.10386	0.776056	0.723232	1.0278	0.0299752	0.716076	-1.24322	0.0269472	0.317509
ssc-miR-1839-5p_st	MIMAT0009456	mmu-miR-1839-5p	1.44826	0.721824	0.798171	0.284005	0.217271	0.375785	0.714189	0.9911	0.478451	0.982221	0.944005	-1.0045	0.528401	0.981945	-1.13605	0.520987	0.799079	-1.13869	0.408184	0.371763	-1.18264	0.468472	0.993609	-1.15817	0.392389	0.580576	-1.2021	0.253525	0.629755	-1.28009	0.932954	0.857757	-1.01711	0.990831	0.806576	1.00232	0.585125	0.978389	-1.12418	0.851052	0.73386	-1.0386	0.923824	0.893176	1.01947	0.640422	0.662915
ssc-miR-184_st	MIMAT0000454	hsa-miR-184	2.91485	0.10577	0.576119	0.436847	0.264756	0.517747	0.714189	0.251071	0.30352	0.642038	0.937124	-1.18663	0.801444	0.981945	-1.09686	0.579861	0.833939	-1.22622	0.0854475	0.196883	-1.91188	0.848133	0.993609	1.07292	0.359088	0.572173	-1.43329	0.278216	0.629755	1.53238	0.457419	0.72425	1.31564	0.761756	0.791632	1.11794	0.11313	0.894707	1.87904	0.23238	0.630184	-1.55917	0.658171	0.893176	-1.17685	0.363759	0.581526
ssc-miR-185_st	MIMAT0000214	mmu-miR-185-5p	10.2157	0.0478719	0.55446	0.149027	0.159876	0.418581	0.714189	0.485125	0.381147	0.690164	0.937124	1.04574	0.257083	0.981945	1.13697	0.957178	0.881795	-1.00603	0.405789	0.371763	-1.09822	0.14481	0.993609	-1.18099	0.368296	0.574225	-1.11366	0.296752	0.629755	-1.13332	0.159389	0.626353	-1.1739	0.235933	0.504978	1.14383	0.320169	0.950953	-1.12652	0.436271	0.666377	-1.09163	0.012648	0.671601	1.34275	0.729087	0.662915
ssc-miR-186_st	MIMAT0000215	mmu-miR-186-5p	1.18027	0.306798	0.638584	0.208718	0.195522	0.735839	0.724898	0.349729	0.334256	0.380927	0.924695	1.12286	0.0686159	0.981945	1.27905	0.791869	0.858953	1.0353	0.574149	0.444503	1.07684	0.285687	0.993609	1.15216	0.33727	0.549486	1.14428	0.543283	0.657089	-1.08869	0.418254	0.72425	1.11288	0.115141	0.445551	1.23544	0.393427	0.950953	-1.12713	0.764796	0.723232	1.04012	0.428963	0.787032	1.11013	0.111512	0.423745
ssc-miR-18a_st	MIMAT0000072	hsa-miR-18a-5p	6.58639	0.968914	0.843961	0.10435	0.139134	0.96133	0.753982	0.333911	0.327363	0.660913	0.937124	-1.11621	0.71362	0.981945	1.09629	0.23515	0.632141	-1.3507	0.741851	0.506957	-1.086	0.825083	0.993609	1.05688	0.904063	0.670108	1.03251	0.0852964	0.522869	-1.59734	0.161778	0.626353	1.42754	0.124132	0.445551	1.48076	0.528807	0.978389	-1.1826	0.386354	0.666377	1.24375	0.883696	0.893176	1.03729	0.0558103	0.317509
ssc-miR-18b_st	MIMAT0001412	hsa-miR-18b-5p	3.5314	0.71168	0.798171	0.0494598	0.088774	0.559139	0.714189	0.795791	0.438013	0.98435	0.944005	1.00842	0.348889	0.981945	1.49658	0.513819	0.799079	-1.32305	0.250194	0.327531	-1.64344	0.513194	0.993609	1.3236	0.677648	0.629865	-1.2076	0.772663	0.726153	-1.13997	0.196004	0.626353	1.7512	0.117353	0.445551	1.98005	0.742617	0.978389	1.1606	0.612516	0.693823	-1.24216	0.773889	0.893176	1.13068	0.36728	0.581526
ssc-miR-191_st	MIMAT0000221	mmu-miR-191-5p	12.2938	0.240008	0.61096	0.368544	0.242235	0.307617	0.714189	0.499302	0.381147	0.572967	0.937124	-1.04067	0.796693	0.981945	1.01835	0.472035	0.789586	-1.05227	0.954783	0.560143	1.00401	0.341875	0.993609	-1.06989	0.0706072	0.383882	-1.14922	0.641869	0.704755	-1.03547	0.813951	0.857757	-1.01675	0.330911	0.567275	1.07158	0.829773	0.979981	1.01622	0.438293	0.666377	1.05649	0.229843	0.716076	1.08952	0.662582	0.662915
ssc-miR-192_st	MIMAT0000222	hsa-miR-192-5p	4.75389	0.143909	0.578654	0.0259649	0.0643553	0.0281041	0.642379	0.424685	0.361021	0.457966	0.924695	-1.34964	0.338521	0.981945	-1.47381	0.224268	0.632141	-1.64021	0.000560792	0.0179234	-4.66036	0.263798	0.993609	-1.57478	0.399318	0.583269	-1.43568	0.122471	0.523723	-1.95858	0.919378	0.857757	1.04154	0.790337	0.79507	1.1129	0.677896	0.978389	-1.19411	0.0137048	0.224695	-2.84133	0.869127	0.893176	1.06851	0.609873	0.662915
ssc-miR-193a-3p_st	MIMAT0000223	mmu-miR-193a-3p	3.11397	0.910374	0.843961	0.30863	0.225043	0.739629	0.724898	0.901164	0.457444	0.719689	0.937124	1.18415	0.744241	0.981945	-1.16606	0.355212	0.728236	-1.54981	0.567865	0.444503	-1.30928	0.575557	0.993609	-1.30228	0.527474	0.588336	-1.37215	0.65852	0.705252	-1.24721	0.711796	0.831969	1.19008	0.546607	0.71186	1.3291	0.663851	0.978389	1.24262	0.720284	0.711715	1.18371	0.81442	0.893176	1.11682	0.93101	0.714715
ssc-miR-193a-5p_st	MIMAT0004614	hsa-miR-193a-5p	8.08614	0.979188	0.843961	0.773053	0.392128	0.490996	0.714189	0.497092	0.381147	0.980502	0.944005	-1.00516	0.655705	0.981945	-1.09866	0.729113	0.858953	-1.07577	0.814802	0.511816	-1.05061	0.756431	0.993609	-1.06758	0.186933	0.509502	-1.3489	0.556709	0.657089	1.14079	0.971096	0.857757	1.00766	0.920395	0.806576	-1.02128	0.362883	0.950953	1.22722	0.910585	0.736096	1.02394	0.891698	0.893176	-1.0291	0.380808	0.590642
ssc-miR-194-5p_st	MIMAT0000224	mmu-miR-194-5p	1.02353	0.95978	0.843961	0.182484	0.18487	0.221018	0.680056	0.441595	0.361963	0.753851	0.937124	-1.03193	0.0646684	0.981945	-1.20989	0.107041	0.632141	-1.17944	0.251462	0.327531	-1.12317	0.150234	0.993609	-1.15797	0.0911116	0.412849	-1.20192	0.0926848	0.522869	-1.2008	0.854509	0.857757	1.01854	0.79924	0.79924	-1.02582	0.86587	0.979981	-1.01811	0.62625	0.695833	1.05009	0.661979	0.893176	-1.04484	0.732696	0.662915
ssc-miR-195_st	MIMAT0000225	mmu-miR-195a-5p	10.3595	0.712154	0.798171	0.124318	0.143318	0.473714	0.714189	0.83446	0.438013	0.803446	0.937124	-1.02921	0.840706	0.981945	-1.02352	0.787269	0.858953	1.03171	0.592416	0.449936	1.06401	0.239377	0.993609	-1.14755	0.512902	0.588336	1.08386	0.933152	0.774679	1.01034	0.151251	0.626353	-1.18394	0.63821	0.766713	-1.05597	0.864496	0.979981	-1.02115	0.78989	0.723232	1.0313	0.326423	0.744973	1.12119	0.233341	0.506683
ssc-miR-196b-3p_st	MIMAT0009201	hsa-miR-196b-3p	1.02824	0.2658	0.638584	0.899767	0.424133	0.48736	0.714189	0.162011	0.293123	0.874483	0.937124	1.01626	0.400139	0.981945	1.09024	0.914503	0.871116	1.01102	0.537458	0.424309	-1.06519	0.439059	0.993609	1.08262	0.0544071	0.383882	1.2398	0.945869	0.774679	-1.00738	0.50425	0.740794	1.07082	0.461924	0.669038	1.07836	0.865727	0.979981	-1.01848	0.469793	0.671132	-1.07693	0.945217	0.893176	1.00704	0.425544	0.604511
ssc-miR-199a_st	MIMAT0000229	mmu-miR-199a-5p	7.69141	0.252198	0.623324	0.561203	0.31178	0.0460597	0.649253	0.0723119	0.265332	0.619442	0.937124	1.08513	0.730586	0.981945	-1.05821	0.890136	0.871116	-1.02294	0.656792	0.471946	1.0758	0.775123	0.993609	-1.04805	0.333329	0.549486	1.18505	0.0163665	0.332444	-1.55143	0.882583	0.857757	-1.02455	0.83643	0.806576	-1.03449	0.022182	0.443071	-1.51665	0.560851	0.69219	1.10048	0.953102	0.893176	-1.0097	0.0304392	0.317509
ssc-miR-199a-3p_st	MIMAT0000232	hsa-miR-199a-3p	9.56162	0.210211	0.583792	0.0321561	0.0694219	0.407241	0.714189	0.840221	0.438013	0.962123	0.944005	-1.00691	0.748038	0.981945	-1.04769	0.118629	0.632141	-1.25971	0.0323198	0.142705	-1.38069	0.831009	0.993609	-1.03142	0.720852	0.637911	-1.05652	0.3601	0.629755	-1.1522	0.174375	0.626353	1.22133	0.20954	0.504978	1.20237	0.562743	0.978389	1.09331	0.528257	0.69219	-1.09604	0.91399	0.893176	-1.01578	0.473202	0.625694
ssc-miR-199a-5p_st	MIMAT0000229	mmu-miR-199a-5p	7.66293	0.656053	0.753708	0.340379	0.231889	0.173234	0.649253	0.091953	0.277334	0.489031	0.924695	1.14191	0.683204	0.981945	-1.0812	0.458262	0.787303	-1.15298	0.704154	0.494054	1.07533	0.868566	0.993609	1.03212	0.379744	0.579083	1.19619	0.0548146	0.468809	-1.49413	0.365781	0.699099	1.19002	0.736734	0.789682	1.06639	0.20694	0.950953	-1.29588	0.265457	0.635529	1.23983	0.566917	0.893176	-1.11593	0.0392529	0.317509
ssc-miR-199a-star_st	MIMAT0000230	mmu-miR-199a-3p	8.37319	0.991904	0.843961	0.00753393	0.0351584	0.327914	0.714189	0.701221	0.427472	0.276589	0.874739	1.1785	0.752919	0.981945	1.04821	0.247191	0.632141	-1.19115	0.115487	0.227187	-1.27156	0.88794	0.993609	1.02129	0.78735	0.64198	-1.04371	0.247917	0.629755	-1.2035	0.196054	0.626353	1.2165	0.144608	0.445551	1.24857	0.948095	0.979981	-1.01037	0.662538	0.711715	-1.06751	0.861805	0.893176	1.02636	0.199357	0.480988
ssc-miR-199b_st	MIMAT0000263	hsa-miR-199b-5p	1.06512	0.924593	0.843961	0.930382	0.434695	0.182602	0.649253	0.745848	0.42794	0.646715	0.937124	1.05613	0.952955	0.981945	-1.00704	0.900187	0.871116	-1.01503	0.730341	0.503683	-1.04189	0.777451	0.993609	-1.03422	0.309132	0.549486	1.1382	0.522539	0.657089	-1.08432	0.874963	0.857757	-1.0189	0.947026	0.806576	1.00793	0.601545	0.978389	-1.06826	0.826271	0.728058	-1.02646	0.822959	0.893176	1.02698	0.707994	0.662915
ssc-miR-199b-star_st	MIMAT0000230	mmu-miR-199a-3p	10.1516	0.789354	0.833108	0.0303534	0.067452	0.759887	0.724898	0.786986	0.438013	0.875833	0.937124	1.02218	0.604906	0.981945	1.0755	0.19268	0.632141	-1.20382	0.153094	0.263962	-1.22635	0.860144	0.993609	-1.02505	0.745672	0.639987	-1.04952	0.335849	0.629755	-1.15536	0.257231	0.626353	1.17441	0.0733709	0.445551	1.29471	0.78266	0.979981	1.04195	0.89493	0.736096	-1.01871	0.488963	0.825601	1.10243	0.424009	0.604511
ssc-miR-19a_st	MIMAT0000073	hsa-miR-19a-3p	2.69443	0.0930302	0.576119	0.0597691	0.0996152	0.631458	0.714189	0.366742	0.336461	0.115702	0.737134	-1.81533	0.119286	0.981945	-1.8044	0.0223564	0.632141	-2.42683	0.273245	0.327531	-1.50802	0.781273	0.993609	1.10863	0.187394	0.509502	-1.69332	0.0663394	0.513341	-2.10413	0.0115898	0.347694	2.69044	0.427064	0.641616	1.34495	0.717317	0.978389	1.15336	0.206001	0.602084	1.60928	0.0693253	0.716076	-2.00041	0.0380849	0.317509
ssc-miR-19b_st	MIMAT0000074	hsa-miR-19b-3p	9.13745	0.110646	0.576119	0.333173	0.231871	0.72029	0.724898	0.230003	0.30352	0.299266	0.874739	-1.22448	0.372552	0.981945	-1.18953	0.100272	0.632141	-1.38421	0.526886	0.421508	-1.1306	0.712308	0.993609	1.07398	0.62648	0.615554	1.10517	0.0995834	0.522869	-1.41282	0.0473459	0.483603	1.48662	0.435382	0.641616	1.16367	0.920544	0.979981	-1.02067	0.299572	0.658343	1.22432	0.21122	0.716076	-1.27753	0.0491487	0.317509
ssc-miR-20_st	MIMAT0000075	hsa-miR-20a-5p	7.8197	0.0250434	0.55446	0.0282496	0.067452	0.940978	0.750819	0.283629	0.314564	0.982492	0.944005	1.00371	0.893072	0.981945	1.02296	0.220416	0.632141	-1.23314	0.0888346	0.196883	-1.34243	0.0823476	0.993609	1.35116	0.495801	0.588336	1.13027	0.628553	0.694829	-1.09069	0.00476418	0.285851	1.66617	0.175636	0.478804	1.26145	0.494775	0.978389	1.13061	0.615768	0.693823	-1.08863	0.106964	0.716076	-1.32084	0.0369649	0.317509
ssc-miR-202_st	MIMAT0002810	hsa-miR-202-5p	1.35316	0.782524	0.833108	0.837339	0.413501	0.537171	0.714189	0.0307596	0.176827	0.0900967	0.724422	1.27677	0.197209	0.981945	1.202	0.457631	0.787303	1.11068	0.901708	0.543744	-1.01753	0.899501	0.993609	1.01793	0.805354	0.647246	1.03747	0.0151417	0.332444	1.46412	0.536627	0.743022	-1.09112	0.575372	0.721361	1.08221	0.0716786	0.770396	1.31822	0.387442	0.666377	-1.13015	0.242817	0.716076	1.18083	0.0200344	0.317509
ssc-miR-204_st	MIMAT0000237	mmu-miR-204-5p	1.26915	0.44207	0.704615	0.0228236	0.062653	0.583411	0.714189	0.58888	0.395221	0.232843	0.853657	-1.13541	0.894918	0.981945	-1.01399	0.0941902	0.632141	-1.19753	0.047211	0.15737	-1.24088	0.60593	0.993609	-1.05588	0.441017	0.588336	-1.09021	0.0473804	0.438702	-1.257	0.23684	0.626353	1.13415	0.121142	0.445551	1.18101	0.664397	0.978389	-1.04966	0.735468	0.721932	-1.0362	0.70063	0.893176	1.04131	0.125467	0.428306
ssc-miR-205_st	MIMAT0000238	mmu-miR-205-5p	1.05229	0.381942	0.682298	0.311102	0.225087	0.627758	0.714189	0.71022	0.427472	0.807051	0.937124	1.03211	0.267163	0.981945	1.15605	0.677153	0.858953	1.0554	0.174607	0.275696	1.19522	0.869474	0.993609	-1.02148	0.307344	0.549486	1.15173	0.692923	0.721794	1.05574	0.562133	0.753171	-1.07808	0.483068	0.676296	1.09536	0.998166	0.979981	1.00032	0.339778	0.661912	1.13248	0.204728	0.716076	1.18088	0.583022	0.662915
ssc-miR-206_st	MIMAT0000239	mmu-miR-206-3p	4.46478	0.494256	0.731477	0.0908982	0.128919	0.108365	0.649253	0.214775	0.302501	0.682505	0.937124	1.27951	0.907828	0.981945	1.07216	0.694437	0.858953	1.26705	0.0347396	0.14375	-3.74285	0.490096	0.993609	1.51734	0.762031	0.64198	1.21338	0.412437	0.657089	-1.69228	0.764664	0.840485	1.19754	0.781487	0.791632	-1.18177	0.237568	0.950953	-2.1442	0.0140434	0.224695	-4.74237	0.564929	0.893176	-1.41522	0.146674	0.428739
ssc-miR-208b_st	MIMAT0004939	mmu-miR-208b-3p	6.96826	0.905451	0.843961	0.964845	0.439279	0.474486	0.714189	0.811408	0.438013	0.800065	0.937124	-1.07713	0.858695	0.981945	-1.0536	0.750937	0.858953	1.09762	0.817678	0.511816	-1.06996	0.798895	0.993609	1.07761	0.669012	0.62674	1.14242	0.448059	0.657089	-1.26754	0.949962	0.857757	-1.01857	0.620789	0.766713	-1.15645	0.292822	0.950953	-1.39128	0.58443	0.69219	-1.17441	0.665511	0.893176	-1.13537	0.320061	0.581526
ssc-miR-21_st	MIMAT0000076	hsa-miR-21-5p	4.72904	0.341453	0.64958	0.192884	0.18487	0.309863	0.714189	0.746645	0.42794	0.833724	0.937124	1.1465	0.844604	0.981945	-1.13615	0.256924	0.632141	-2.10884	0.13527	0.24973	-2.69393	0.750232	0.993609	-1.2305	0.75893	0.64198	1.23624	0.519655	0.657089	-1.5623	0.410633	0.72425	1.71381	0.345724	0.580816	1.85613	0.664478	0.978389	1.34983	0.707159	0.711715	-1.27744	0.902489	0.893176	1.08304	0.729789	0.662915
ssc-miR-210_st	MIMAT0000267	hsa-miR-210-3p	5.00045	0.0975734	0.576119	0.0250246	0.0643553	0.323955	0.714189	0.282998	0.314564	0.305034	0.874739	1.31631	0.36023	0.981945	1.27724	0.580132	0.833939	1.15869	0.0924409	0.198088	-1.58054	0.613872	0.993609	-1.14371	0.157419	0.507237	-1.49939	0.524053	0.657089	-1.19731	0.293535	0.644344	-1.32521	0.71407	0.789682	1.10232	0.250448	0.950953	-1.38731	0.028747	0.373736	-1.83135	0.160498	0.716076	1.4608	0.870879	0.689446
ssc-miR-214_st	MIMAT0000271	hsa-miR-214-3p	9.58664	0.154241	0.583792	0.250971	0.207024	0.76888	0.724898	0.140788	0.281576	0.461885	0.924695	-1.13078	0.326163	0.981945	-1.17893	0.672423	0.858953	-1.07295	0.87959	0.538572	1.02552	0.570119	0.993609	-1.09932	0.0631933	0.383882	-1.40139	0.0303853	0.395727	-1.48808	0.883971	0.857757	-1.02457	0.572119	0.721361	-1.09877	0.0712803	0.770396	-1.3869	0.566383	0.69219	1.10033	0.67458	0.893176	-1.07243	0.0936964	0.386066
ssc-miR-216_st	MIMAT0000273	hsa-miR-216a-5p	1.0681	0.0999992	0.576119	0.371855	0.242702	0.00390099	0.404956	0.41742	0.359899	0.0684917	0.720774	1.20954	0.179207	0.981945	-1.1485	0.351699	0.728236	1.09992	0.68632	0.490229	1.04191	0.193486	0.993609	-1.14329	0.636317	0.619234	1.05233	0.452504	0.657089	-1.08467	0.0301389	0.452083	-1.25752	0.0272466	0.357963	-1.26326	0.108745	0.894707	-1.19305	0.594397	0.69219	-1.05568	0.964264	0.893176	-1.00456	0.625646	0.662915
ssc-miR-218b_st	MIMAT0000275	hsa-miR-218-5p	1.65564	0.6183	0.746766	0.0450404	0.0840755	0.788327	0.724898	0.350869	0.334256	0.79215	0.937124	-1.0529	0.354973	0.981945	1.1998	0.0822958	0.632141	-1.41701	0.24192	0.327531	-1.26043	0.753804	0.993609	-1.06329	0.989169	0.694456	-1.00282	0.378126	0.640058	-1.20198	0.148983	0.626353	1.33267	0.0103146	0.323489	1.70013	0.429828	0.975282	1.1789	0.55043	0.69219	1.12422	0.218801	0.716076	1.27574	0.555528	0.662915
ssc-miR-221_st	MIMAT0000278	hsa-miR-221-3p	7.48548	0.22108	0.583792	0.117767	0.141144	0.283115	0.714189	0.110987	0.277334	0.462287	0.924695	1.10814	0.689876	0.981945	1.05713	0.553521	0.821353	-1.08614	0.0204617	0.140929	-1.40142	0.922267	0.993609	-1.01366	0.729455	0.637911	1.05239	0.705025	0.725273	1.05749	0.62015	0.791681	1.0715	0.324296	0.567275	1.14819	0.351139	0.950953	1.14858	0.0744638	0.464597	-1.29027	0.619814	0.893176	1.07157	0.638261	0.662915
ssc-miR-222_st	MIMAT0000279	hsa-miR-222-3p	7.80226	0.625875	0.746766	0.222106	0.199602	0.770439	0.724898	0.778449	0.437331	0.730955	0.937124	1.06003	0.474306	0.981945	1.12942	0.611739	0.846316	-1.08997	0.497407	0.411647	-1.12229	0.675714	0.993609	-1.07353	0.47144	0.588336	-1.13875	0.96099	0.774679	1.00882	0.928482	0.857757	1.01532	0.225477	0.504978	1.23103	0.598001	0.978389	1.09959	0.863059	0.736096	-1.02965	0.260426	0.716076	1.21246	0.657654	0.662915
ssc-miR-22-3p_st	MIMAT0000077	hsa-miR-22-3p	11.4807	0.770971	0.833108	0.501887	0.292767	0.776841	0.724898	0.980416	0.47593	0.72513	0.937124	1.04675	0.80489	0.981945	1.03261	0.825357	0.858953	1.02907	0.379766	0.365947	1.12162	0.91264	0.993609	1.01435	0.61237	0.615554	1.07242	0.668362	0.705252	1.06086	0.911601	0.857757	-1.01452	0.978938	0.806576	1.00343	0.825213	0.979981	1.03089	0.508685	0.690118	1.08993	0.890708	0.893176	1.018	0.744934	0.669358
ssc-miR-22-5p_st	MIMAT0004495	hsa-miR-22-5p	5.4362	0.301151	0.638584	0.283371	0.217271	0.625309	0.714189	0.0182087	0.113819	0.412197	0.924695	1.2261	0.189642	0.981945	1.38952	0.716389	0.858953	-1.09406	0.0508783	0.160003	-1.64635	0.850387	0.993609	-1.04774	0.402255	0.583269	1.24719	0.25495	0.629755	1.35221	0.861106	0.857757	1.04421	0.0978139	0.445551	1.52022	0.142428	0.894707	1.47939	0.105872	0.529361	-1.50481	0.135919	0.716076	1.45586	0.190308	0.474906
ssc-miR-2320_st	ssc-miR-2320_st	ssc-miR-2320_st	5.32977	0.322066	0.647511	0.000209137	0.0186417	0.926681	0.750819	0.00389004	0.0928109	0.0179346	0.582516	2.10187	0.476164	0.981945	1.23865	0.64301	0.858953	-1.14899	0.0231605	0.140929	-2.03375	0.657066	0.993609	1.14226	0.0128821	0.311319	-2.29807	0.547382	0.657089	1.21103	0.366636	0.699099	1.31245	0.243471	0.504978	1.4232	0.302092	0.950953	1.39146	0.0637552	0.464597	-1.77003	0.78664	0.893176	1.08438	0.853853	0.688685
ssc-miR-2320-star_st	ssc-miR-2320-star_st	ssc-miR-2320-star_st	1.41055	0.646243	0.753708	0.292137	0.218129	0.940145	0.750819	0.762787	0.430953	0.759885	0.937124	-1.08237	0.775745	0.981945	-1.07656	0.176743	0.632141	-1.42624	0.257102	0.327531	-1.34512	0.346979	0.993609	-1.27789	0.409751	0.586311	-1.25555	0.753233	0.726153	-1.0902	0.671737	0.813627	1.11609	0.281809	0.526043	1.32481	0.331521	0.950953	1.30823	0.821066	0.728058	1.0603	0.509229	0.835953	1.18701	0.563887	0.662915
ssc-miR-23a_st	MIMAT0000078	hsa-miR-23a-3p	12.8862	0.763108	0.833108	0.257945	0.209347	0.0737305	0.649253	0.379585	0.341969	0.178994	0.768505	1.09886	0.767027	0.981945	-1.02069	0.775958	0.858953	1.01987	0.114119	0.227187	-1.11794	0.872404	0.993609	1.01116	0.781173	0.64198	1.02058	0.928956	0.774679	-1.00655	0.901214	0.857757	-1.00861	0.56217	0.721361	-1.04097	0.720885	0.978389	-1.02655	0.0651323	0.464597	-1.14016	0.648158	0.893176	-1.03208	0.809942	0.683951
ssc-miR-23b_st	MIMAT0000125	mmu-miR-23b-3p	13.4547	0.11944	0.576119	0.214695	0.198362	0.623824	0.714189	0.679433	0.424616	0.0791048	0.720774	1.12522	0.547676	0.981945	1.04026	0.0805689	0.632141	1.12454	0.231572	0.323123	1.08248	0.944094	0.993609	1.0046	0.521626	0.588336	1.04565	0.199193	0.574688	1.09459	0.0925125	0.546715	-1.11939	0.239405	0.504978	-1.08102	0.697684	0.978389	-1.02737	0.561332	0.69219	-1.03886	0.594943	0.893176	1.0355	0.222348	0.50443
ssc-miR-24_st	MIMAT0000080	hsa-miR-24-3p	13.8726	0.2192	0.583792	0.850185	0.417634	0.285341	0.714189	0.00239449	0.0928109	0.10815	0.724422	-1.05554	0.148222	0.981945	-1.04963	0.459028	0.787303	1.02478	0.724161	0.502308	1.01169	0.992721	0.994275	1.0003	0.229836	0.532561	-1.04335	0.00378352	0.307411	-1.11481	0.464504	0.72425	-1.02448	0.0330731	0.357963	-1.07565	0.000580929	0.118632	-1.14244	0.696451	0.711715	-1.01294	0.14581	0.716076	-1.04995	0.00370042	0.307934
ssc-miR-2476_st	ssc-miR-2476_st	ssc-miR-2476_st	1.06075	0.123268	0.576119	0.888006	0.423594	0.589242	0.714189	0.601841	0.399439	0.369625	0.924695	-1.14311	0.731127	0.981945	-1.05225	0.817838	0.858953	-1.03471	0.246604	0.327531	-1.18949	0.941384	0.993609	1.01095	0.669964	0.62674	-1.06934	0.362964	0.629755	1.15474	0.761335	0.840485	1.04604	0.909612	0.806576	-1.01695	0.262133	0.950953	1.19482	0.350028	0.663753	-1.14959	0.676758	0.893176	-1.06377	0.399935	0.601882
ssc-miR-24-star_st	MIMAT0004497	hsa-miR-24-2-5p	6.45898	0.41115	0.687026	0.393468	0.247348	0.0380056	0.649253	0.829473	0.438013	0.37891	0.924695	1.17026	0.818914	0.981945	-1.0415	0.737326	0.858953	-1.06141	0.394431	0.371763	-1.16429	0.251511	0.993609	-1.22856	0.791245	0.64198	1.05113	0.205464	0.574688	-1.27337	0.412694	0.72425	-1.15748	0.915057	0.806576	1.01912	0.33733	0.950953	-1.1997	0.6031	0.69219	-1.09693	0.355591	0.768721	1.17961	0.849156	0.688685
ssc-miR-26a_st	MIMAT0000082	hsa-miR-26a-5p	13.6067	0.929264	0.843961	0.0188462	0.0559348	0.856355	0.734915	0.534574	0.389756	0.280894	0.874739	-1.03405	0.71694	0.981945	-1.01122	0.130185	0.632141	-1.04859	0.314221	0.342786	-1.0317	0.91117	0.993609	-1.00344	0.125854	0.490266	-1.05224	0.0282106	0.395727	-1.07742	0.159232	0.626353	1.045	0.243359	0.504978	1.03695	0.408221	0.950953	-1.0275	0.598322	0.69219	1.01637	0.801624	0.893176	-1.00776	0.0356664	0.317509
ssc-miR-27a_st	MIMAT0000084	hsa-miR-27a-3p	10.6667	0.601318	0.746766	0.728537	0.37776	0.0794984	0.649253	0.113874	0.277334	0.679525	0.937124	1.06445	0.701815	0.981945	-1.05958	0.37013	0.7323	-1.14595	0.797673	0.511816	-1.03948	0.794285	0.993609	-1.04018	0.105523	0.458289	1.30349	0.15268	0.531457	-1.26241	0.522671	0.740794	1.10169	0.60458	0.752367	1.08151	0.546769	0.978389	-1.10163	0.519844	0.69219	1.10242	0.902558	0.893176	-1.01866	0.232215	0.506683
ssc-miR-27b_st	MIMAT0000126	mmu-miR-27b-3p	12.0725	0.353224	0.664825	0.106948	0.140432	0.569281	0.714189	0.743739	0.42794	0.788768	0.937124	-1.02869	0.924012	0.981945	1.01012	0.207806	0.632141	-1.14422	0.145355	0.260337	-1.16935	0.923099	0.993609	-1.01024	0.876446	0.66443	1.01756	0.316047	0.629755	-1.11983	0.243367	0.626353	1.13262	0.176701	0.478804	1.15579	0.847406	0.979981	1.02178	0.83691	0.731725	-1.02197	0.847846	0.893176	1.02046	0.360879	0.581526
ssc-miR-27b-star_st	MIMAT0004522	mmu-miR-27b-5p	5.32759	0.604724	0.746766	0.595712	0.325145	0.628328	0.714189	0.365406	0.336461	0.263846	0.868492	1.27527	0.948532	0.981945	1.014	0.910948	0.871116	1.02438	0.364009	0.361037	-1.21754	0.779072	0.993609	1.06231	0.861442	0.66441	1.04068	0.351655	0.629755	1.23898	0.865938	0.857757	1.03703	0.962273	0.806576	-1.01024	0.407684	0.950953	1.20949	0.309148	0.658343	-1.24722	0.828927	0.893176	-1.04765	0.502202	0.625694
ssc-miR-28-3p_st	MIMAT0004502	hsa-miR-28-3p	8.34502	0.176977	0.583792	0.792311	0.397575	0.0441928	0.649253	0.00500993	0.0928109	0.188299	0.774772	1.15997	0.436622	0.981945	-1.0908	0.686117	0.858953	1.04601	0.00906321	0.120843	-1.36012	0.499678	0.993609	-1.07822	0.991396	0.694456	1.00127	0.119952	0.523723	1.20578	0.283808	0.644344	-1.12783	0.240864	0.504978	-1.14098	0.23353	0.950953	1.15275	0.00325134	0.0893735	-1.4227	0.916939	0.893176	-1.01166	0.0323109	0.317509
ssc-miR-28-5p_st	MIMAT0000085	hsa-miR-28-5p	1.59494	0.694373	0.792584	0.273143	0.216045	0.571027	0.714189	0.995179	0.478451	0.967822	0.944005	-1.0087	0.956876	0.981945	-1.01168	0.81678	0.858953	-1.05102	0.422786	0.378614	-1.1889	0.762697	0.993609	-1.06702	0.522868	0.588336	-1.15718	0.368165	0.629755	-1.22915	0.943894	0.857757	-1.01522	0.858982	0.806576	1.03889	0.493439	0.978389	-1.16948	0.566926	0.69219	-1.13118	0.804159	0.893176	1.05471	0.53578	0.659622
ssc-miR-296_st	MIMAT0000374	mmu-miR-296-5p	1.13531	0.942588	0.843961	0.936147	0.434695	0.533396	0.714189	0.944365	0.466866	0.705023	0.937124	1.06269	0.416221	0.981945	1.14016	0.529824	0.799079	1.10643	0.627535	0.456389	1.08112	0.340906	0.993609	1.16646	0.581987	0.601651	1.09847	0.560278	0.657089	1.1045	0.742122	0.840485	1.05426	0.851563	0.806576	1.03049	0.991844	0.979981	-1.00174	0.885355	0.736096	-1.02341	0.886968	0.893176	-1.02307	0.748624	0.669358
ssc-miR-299_st	MIMAT0000377	mmu-miR-299a-5p	1.95072	0.3893	0.682298	0.164692	0.17271	0.586069	0.714189	0.753174	0.42794	0.192662	0.776547	1.35193	0.937261	0.981945	1.01812	0.961094	0.881795	1.01119	0.612996	0.456389	-1.1226	0.916522	0.993609	1.0242	0.476464	0.588336	-1.18891	0.857816	0.746742	-1.04432	0.955308	0.857757	1.01287	0.976118	0.806576	1.00685	0.821902	0.979981	-1.05601	0.579417	0.69219	-1.13517	0.979171	0.893176	-1.00597	0.781125	0.678463
ssc-miR-29a_st	MIMAT0000086	hsa-miR-29a-3p	9.21972	0.469873	0.71665	0.5195	0.297464	0.434548	0.714189	0.414665	0.359899	0.655529	0.937124	-1.08052	0.633107	0.981945	-1.08642	0.692798	0.858953	-1.07096	0.78781	0.511816	1.04778	0.964658	0.993609	-1.00771	0.209517	0.514916	1.26337	0.420274	0.657089	-1.16064	0.725657	0.837297	1.06277	0.934097	0.806576	-1.01444	0.66231	0.978389	-1.08373	0.507689	0.690118	1.12214	0.66481	0.893176	-1.07811	0.444379	0.615328
ssc-miR-29c_st	MIMAT0000536	mmu-miR-29c-3p	6.44423	0.123531	0.576119	0.194068	0.18487	0.644635	0.714189	0.579117	0.395221	0.805664	0.937124	-1.11042	0.772935	0.981945	-1.13073	0.159155	0.632141	-1.83908	0.275728	0.327531	-1.59758	0.656892	0.993609	1.20844	0.506989	0.588336	1.35065	0.359259	0.629755	-1.51698	0.068112	0.483603	2.22242	0.258155	0.50998	1.62645	0.670136	0.978389	1.21233	0.741003	0.72293	1.15116	0.465154	0.818399	-1.36642	0.185829	0.474906
ssc-miR-30a-3p_st	MIMAT0000088	hsa-miR-30a-3p	7.51299	0.301104	0.638584	0.00706653	0.0347128	0.179433	0.649253	0.0171201	0.113819	0.128712	0.747667	1.19435	0.566569	0.981945	1.0681	0.160259	0.632141	-1.17784	0.0901083	0.196883	-1.22029	0.389098	0.993609	1.10445	0.166462	0.507245	-1.18648	0.109396	0.522869	1.22011	0.0277125	0.452083	1.30087	0.0524596	0.383183	1.25805	0.00529019	0.407699	1.4371	0.757603	0.723232	-1.03604	0.770467	0.893176	-1.03404	0.415352	0.604511
ssc-miR-30a-5p_st	MIMAT0000087	hsa-miR-30a-5p	10.0783	0.306333	0.638584	0.317131	0.22639	0.393198	0.714189	0.309861	0.314564	0.479896	0.924695	-1.08331	0.523486	0.981945	-1.07488	0.71768	0.858953	-1.04167	0.764257	0.510798	1.03443	0.969724	0.993609	-1.00429	0.136499	0.490266	1.19903	0.422601	0.657089	-1.10126	0.746151	0.840485	1.03722	0.780983	0.791632	-1.03188	0.642513	0.978389	-1.05721	0.509478	0.690118	1.07753	0.548245	0.887505	-1.07028	0.443268	0.615328
ssc-miR-30b-3p_st	MIMAT0004589	hsa-miR-30b-3p	7.07894	0.921885	0.843961	0.0461334	0.0844271	0.259711	0.714189	0.00708885	0.0928109	0.746394	0.937124	1.06566	0.89132	0.981945	-1.02721	0.987253	0.883711	1.00314	0.00227791	0.0546699	-1.91536	0.29177	0.993609	-1.23256	0.0479471	0.383882	-1.53138	0.755448	0.726153	1.06712	0.284721	0.644344	-1.23643	0.878712	0.806576	-1.03044	0.766898	0.979981	1.06377	0.00218389	0.0873554	-1.92138	0.357086	0.768721	1.1999	0.194821	0.477625
ssc-miR-30b-5p_st	MIMAT0000130	mmu-miR-30b-5p	9.9153	0.2094	0.583792	0.934957	0.434695	0.465193	0.714189	0.554751	0.395221	0.873496	0.937124	-1.02176	0.622129	0.981945	-1.06903	0.252553	0.632141	-1.16928	0.617236	0.456389	-1.07004	0.667224	0.993609	-1.05994	0.315931	0.549486	1.15606	0.755537	0.726153	-1.04569	0.469617	0.72425	1.10316	0.508837	0.689392	1.09377	0.438209	0.978389	1.11819	0.513275	0.690118	1.09274	0.949597	0.893176	-1.00858	0.924794	0.713547
ssc-miR-30c_st	MIMAT0000244	hsa-miR-30c-5p	11.265	0.581679	0.746766	0.179566	0.18487	0.879284	0.74045	0.251921	0.30352	0.110039	0.724422	1.10116	0.667148	0.981945	1.02574	0.200582	0.632141	1.07958	0.170104	0.275696	1.08573	0.0709913	0.993609	1.11576	0.041742	0.383882	1.14113	0.0972766	0.522869	1.11208	0.577431	0.753171	1.03351	0.388884	0.634296	-1.05249	0.636218	0.978389	1.0301	0.923398	0.736096	1.00569	0.160894	0.716076	-1.08776	0.957916	0.714719
ssc-miR-30d_st	MIMAT0000245	hsa-miR-30d-5p	11.7888	0.304604	0.638584	0.76441	0.389863	0.374314	0.714189	0.886381	0.452235	0.669622	0.937124	1.02308	0.407287	0.981945	1.04552	0.909051	0.871116	1.00612	0.340974	0.352732	1.05258	0.762055	0.993609	-1.01631	0.853057	0.661684	-1.01055	0.511544	0.657089	1.03802	0.676931	0.813627	-1.02253	0.473902	0.669038	1.03916	0.582517	0.978389	1.03171	0.400741	0.666377	1.04618	0.26084	0.716076	1.06258	0.348494	0.581526
ssc-miR-30e-3p_st	MIMAT0000249	mmu-miR-30e-3p	6.74657	0.224404	0.583857	0.0345506	0.0716604	0.467169	0.714189	0.00123473	0.0928109	0.94803	0.944005	1.01509	0.726229	0.981945	1.08386	0.994175	0.883711	1.00168	0.00394612	0.0750799	-2.03706	0.659164	0.993609	1.10682	0.0422695	0.383882	-1.66965	0.126866	0.526059	1.46145	0.664431	0.81359	1.10497	0.731698	0.789682	1.08204	0.128489	0.894707	1.459	0.00387258	0.0893735	-2.04048	0.927271	0.893176	-1.02119	0.259168	0.525018
ssc-miR-30e-5p_st	MIMAT0000692	hsa-miR-30e-5p	11.1268	0.88343	0.843961	0.48195	0.284696	0.700616	0.724898	0.0872373	0.277334	0.395379	0.924695	-1.17205	0.600827	0.981945	-1.10226	0.482609	0.79005	-1.13985	0.331246	0.34868	1.19941	0.762581	0.993609	-1.05773	0.347949	0.560585	1.20467	0.16323	0.531457	-1.32198	0.687558	0.819606	1.07763	0.856702	0.806576	1.0341	0.453728	0.978389	-1.15979	0.0997543	0.529361	1.36715	0.82431	0.893176	-1.0421	0.262509	0.525018
ssc-miR-32_st	MIMAT0000090	hsa-miR-32-5p	1.28492	0.618625	0.746766	0.986308	0.444712	0.476836	0.714189	0.306328	0.314564	0.15841	0.768505	1.23436	0.415874	0.981945	-1.1276	0.877516	0.871116	1.02288	0.801194	0.511816	1.03767	0.899905	0.993609	-1.01864	0.745916	0.639987	-1.05179	0.662428	0.705252	1.07045	0.779659	0.84091	-1.04195	0.334702	0.567979	-1.1534	0.770498	0.979981	1.0465	0.922107	0.736096	1.01446	0.49045	0.825601	-1.10697	0.579286	0.662915
ssc-miR-320_st	MIMAT0000510	hsa-miR-320a	10.7757	0.137342	0.576119	0.233099	0.203326	0.567814	0.714189	0.260448	0.306409	0.291194	0.874739	1.19942	0.618899	0.981945	1.08879	0.626443	0.858953	1.08679	0.325897	0.347746	-1.18416	0.415273	0.993609	-1.15006	0.174769	0.509502	-1.2834	0.834648	0.737865	1.03852	0.197517	0.626353	-1.24987	0.991433	0.806576	1.00183	0.801916	0.979981	-1.04648	0.146517	0.540707	-1.28694	0.193961	0.716076	1.25217	0.330374	0.581526
ssc-miR-323_st	MIMAT0000551	mmu-miR-323-3p	1.24305	0.714653	0.798171	0.663982	0.350122	0.779532	0.724898	0.712204	0.427472	0.487449	0.924695	1.13069	0.34222	0.981945	1.18366	0.192581	0.632141	1.26224	0.753727	0.508547	1.05688	0.420445	0.993609	1.1534	0.569442	0.601651	1.11248	0.295275	0.629755	1.21823	0.609574	0.783738	-1.09436	0.715548	0.789682	-1.06638	0.84942	0.979981	-1.03613	0.317594	0.658343	-1.19431	0.883165	0.893176	1.02623	0.769972	0.675265
ssc-miR-324_st	MIMAT0000555	mmu-miR-324-5p	6.26217	0.623578	0.746766	0.00314862	0.0294488	0.00506196	0.404956	0.00485888	0.0928109	0.0802888	0.720774	1.56132	0.361358	0.981945	1.25626	0.908326	0.871116	-1.02899	0.000434594	0.0179234	-2.64554	0.213707	0.993609	-1.36707	0.695562	0.634318	-1.10865	0.535617	0.657089	-1.17773	0.257501	0.626353	-1.32855	0.305253	0.551551	1.29268	0.608821	0.978389	-1.14455	0.00059686	0.0710496	-2.571	0.0358566	0.716076	1.71739	0.572201	0.662915
ssc-miR-326_st	MIMAT0000559	mmu-miR-326-3p	1.03823	0.878185	0.843961	0.0620653	0.101627	0.407007	0.714189	0.386114	0.344745	0.164782	0.768505	1.19095	0.963822	0.981945	-1.00563	0.462113	0.787303	1.09573	0.367858	0.361828	1.11874	0.858943	0.993609	-1.02224	0.084146	0.402786	1.26178	0.132405	0.526059	1.22303	0.362766	0.699099	-1.1201	0.435346	0.641616	-1.10189	0.405107	0.950953	1.11619	0.866653	0.736096	1.021	0.894676	0.893176	1.01652	0.0965165	0.386066
ssc-miR-328_st	MIMAT0000565	mmu-miR-328-3p	4.28437	0.610618	0.746766	0.811498	0.405026	0.105334	0.649253	0.182556	0.293123	0.651245	0.937124	1.15894	0.566433	0.981945	-1.20596	0.5673	0.833939	1.20546	0.0961562	0.198944	-1.74179	0.165426	0.993609	-1.58294	0.305178	0.549486	-1.42969	0.848069	0.744926	1.06846	0.0546116	0.483603	-1.90817	0.255946	0.50998	-1.45374	0.727231	0.978389	-1.12822	0.0288294	0.373736	-2.09965	0.406459	0.770059	1.31259	0.135598	0.428306
ssc-miR-331-3p_st	MIMAT0000571	mmu-miR-331-3p	6.94777	0.337262	0.64958	0.0185273	0.0559348	0.0163931	0.524579	0.603152	0.399439	0.635619	0.937124	-1.04398	0.291164	0.981945	-1.10143	0.64769	0.858953	1.04238	0.80655	0.511816	-1.02246	0.188004	0.993609	-1.12877	0.0378152	0.383882	1.23026	0.789459	0.726153	-1.02603	0.0805131	0.517584	-1.17661	0.134991	0.445551	-1.14811	0.486481	0.978389	-1.06951	0.484004	0.676312	-1.06579	0.786954	0.893176	1.02482	0.324954	0.581526
ssc-miR-331-5p_st	MIMAT0004643	mmu-miR-331-5p	6.1182	0.172168	0.583792	0.00490566	0.0294488	0.17278	0.649253	0.121427	0.277334	0.402408	0.924695	1.22389	0.560854	0.981945	-1.15015	0.76782	0.858953	-1.07344	0.0188459	0.140929	-1.8051	0.28362	0.993609	-1.29654	0.00696377	0.311319	-2.07719	0.252298	0.629755	-1.34245	0.433509	0.72425	-1.20784	0.773657	0.791632	-1.07147	0.382461	0.950953	-1.25061	0.0368295	0.387504	-1.68161	0.618178	0.893176	1.12728	0.891224	0.698278
ssc-miR-335_st	MIMAT0000765	hsa-miR-335-5p	1.235	0.140022	0.576119	0.246096	0.207024	0.429301	0.714189	0.938591	0.466866	0.51504	0.933215	1.09688	0.23497	0.981945	1.18544	0.598502	0.846316	1.07756	0.815935	0.511816	1.03351	0.674631	0.993609	1.06131	0.381759	0.579083	-1.14128	0.977288	0.774679	1.00428	0.914508	0.857757	-1.01531	0.501844	0.689392	1.10011	0.639593	0.978389	-1.07296	0.768229	0.723232	-1.04262	0.436844	0.79371	1.11696	0.713251	0.662915
ssc-miR-339-3p_st	MIMAT0004702	hsa-miR-339-3p	1.34753	0.620356	0.746766	0.0404687	0.0786891	0.376789	0.714189	0.911708	0.458145	0.840657	0.937124	-1.03954	0.748259	0.981945	1.06388	0.443619	0.787303	-1.16001	0.449969	0.380256	-1.1576	0.881991	0.993609	1.02904	0.0861128	0.402786	-1.43314	0.50242	0.657089	-1.14759	0.361801	0.699099	1.1937	0.279972	0.526043	1.23412	0.958023	0.979981	1.01082	0.991394	0.766295	1.00208	0.862889	0.893176	1.03386	0.418667	0.604511
ssc-miR-339-5p_st	MIMAT0000584	mmu-miR-339-5p	8.27003	0.213033	0.583792	0.360305	0.240203	0.803882	0.728517	0.0541933	0.216773	0.405352	0.924695	1.12584	0.843102	0.981945	-1.02844	0.176721	0.632141	1.21446	0.0290407	0.140929	1.3799	0.169618	0.993609	1.21852	0.334682	0.549486	1.15726	0.485236	0.657089	-1.111	0.981179	0.857757	1.00335	0.123874	0.445551	-1.24899	0.0533835	0.726765	-1.34927	0.370411	0.666377	1.13622	0.118543	0.716076	-1.25317	0.050935	0.317509
ssc-miR-340_st	MIMAT0004651	mmu-miR-340-5p	1.34379	0.166834	0.583792	0.642802	0.342199	0.323155	0.714189	0.733487	0.42794	0.378965	0.924695	-1.17837	0.290051	0.981945	-1.21891	0.221915	0.632141	-1.25768	0.409464	0.371763	-1.16621	0.277345	0.993609	-1.22551	0.587064	0.601651	1.11297	0.570151	0.657089	-1.11843	0.888847	0.857757	1.02625	0.865895	0.806576	1.0318	0.551776	0.978389	1.1245	0.684126	0.711715	1.07843	0.976761	0.893176	1.00541	0.64247	0.662915
ssc-miR-342_st	MIMAT0000590	mmu-miR-342-3p	8.42319	0.549521	0.746766	0.00215092	0.0294488	0.836531	0.734915	0.527588	0.389756	0.877813	0.937124	1.01916	0.429668	0.981945	-1.10295	0.183047	0.632141	1.18154	0.030829	0.142288	1.31964	0.651805	0.993609	-1.05738	0.558904	0.601651	1.07976	0.150649	0.531457	1.21104	0.0789459	0.517584	-1.24934	0.0385938	0.357963	-1.30319	0.85063	0.979981	1.02497	0.373692	0.666377	1.11687	0.732676	0.893176	-1.0431	0.0664492	0.336676
ssc-miR-345-3p_st	MIMAT0004656	mmu-miR-345-3p	5.50939	0.801481	0.833108	0.00446595	0.0294488	0.0811921	0.649253	0.121105	0.277334	0.769232	0.937124	-1.0826	0.811031	0.981945	-1.0668	0.28995	0.666886	-1.33482	0.000539764	0.0179234	-2.82488	0.138885	0.993609	-1.5032	0.0699538	0.383882	-1.70637	0.181308	0.566587	-1.47571	0.660856	0.81359	-1.12614	0.409738	0.635725	1.25124	0.726646	0.978389	-1.10555	0.0089322	0.178644	-2.11629	0.210643	0.716076	1.40907	0.948684	0.714719
ssc-miR-345-5p_st	MIMAT0000595	mmu-miR-345-5p	6.40189	0.0661084	0.571143	0.568015	0.311851	0.113628	0.649253	0.838638	0.438013	0.128229	0.747667	1.36574	0.788383	0.981945	1.05544	0.7712	0.858953	1.06021	0.793009	0.511816	1.05417	0.422853	0.993609	-1.17576	0.815631	0.648107	1.05097	0.365125	0.629755	-1.21452	0.2775	0.644344	-1.24655	0.982098	0.806576	-1.00452	0.240968	0.950953	-1.28765	0.9773	0.76277	-1.00573	0.287256	0.716076	1.24095	0.87906	0.692317
ssc-miR-34a_st	MIMAT0000255	hsa-miR-34a-5p	7.88688	0.506663	0.737416	0.567821	0.311851	0.363697	0.714189	0.0541568	0.216773	0.254606	0.866452	1.22368	0.518074	0.981945	1.12038	0.348997	0.728236	-1.17981	0.264059	0.327531	-1.21873	0.429212	0.993609	-1.14945	0.283052	0.549486	1.22324	0.48295	0.657089	1.13992	0.881744	0.857757	1.02642	0.118872	0.445551	1.32184	0.118444	0.894707	1.34488	0.853112	0.73386	-1.03299	0.15594	0.716076	1.28782	0.153069	0.438153
ssc-miR-361-3p_st	MIMAT0017075	mmu-miR-361-3p	1.72861	0.981276	0.843961	0.894085	0.423594	0.709545	0.724898	0.166067	0.293123	0.054992	0.679221	-1.51988	0.110984	0.981945	-1.411	0.182932	0.632141	-1.33085	0.358131	0.361037	-1.21612	0.0411533	0.993609	-1.56416	0.0502623	0.383882	-1.57395	0.144426	0.531457	-1.39549	0.447044	0.72425	-1.17531	0.782208	0.791632	-1.06022	0.832557	0.979981	-1.04857	0.670248	0.711715	1.09435	0.626623	0.893176	1.10855	0.611613	0.662915
ssc-miR-361-5p_st	MIMAT0000703	hsa-miR-361-5p	10.7085	0.104443	0.576119	0.236443	0.204333	0.788281	0.724898	0.817857	0.438013	0.788482	0.937124	1.02161	0.964541	0.981945	1.00355	0.731654	0.858953	-1.02771	0.803638	0.511816	-1.02001	0.289775	0.993609	-1.08883	0.129681	0.490266	-1.13941	0.351868	0.629755	-1.08243	0.470137	0.72425	-1.05947	0.698584	0.789682	1.03136	0.540372	0.978389	-1.05325	0.924721	0.736096	1.00755	0.270559	0.716076	1.09269	0.944382	0.714719
ssc-miR-362_st	MIMAT0000705	hsa-miR-362-5p	5.35593	0.887999	0.843961	0.0794926	0.119666	0.416284	0.714189	0.587544	0.395221	0.857341	0.937124	-1.05426	0.745682	0.981945	-1.1001	0.194515	0.632141	-1.4722	0.046892	0.15737	-1.82956	0.177135	0.993609	-1.49604	0.195619	0.509502	-1.50558	0.440342	0.657089	-1.27346	0.95641	0.857757	-1.01619	0.325463	0.567275	1.33824	0.642374	0.978389	1.15606	0.461687	0.666377	-1.24274	0.299941	0.723189	1.35991	0.606131	0.662915
ssc-miR-363_st	MIMAT0000707	hsa-miR-363-3p	3.60097	0.115069	0.576119	0.0151209	0.05428	0.585001	0.714189	0.106742	0.277334	0.99312	0.944005	-1.00491	0.481966	0.981945	1.49368	0.0290028	0.632141	-3.64171	0.0214693	0.140929	-3.92511	0.698926	0.993609	-1.24616	0.569126	0.601651	-1.41072	0.757658	0.726153	1.20457	0.0666839	0.483603	2.92235	0.00531666	0.323489	5.43954	0.0192563	0.443071	4.38671	0.895093	0.736096	-1.07782	0.279011	0.716076	1.86136	0.501995	0.625694
ssc-miR-365-3p_st	MIMAT0000710	hsa-miR-365a-3p	1.19085	0.135612	0.576119	0.444037	0.267377	0.140923	0.649253	0.797629	0.438013	0.79203	0.937124	-1.03105	0.0998452	0.981945	-1.21551	0.525006	0.799079	-1.07672	0.0461446	0.15737	-1.27009	0.733913	0.993609	-1.04022	0.551595	0.601651	-1.07617	0.611687	0.685511	-1.06454	0.766203	0.840485	1.03509	0.299888	0.551551	-1.1289	0.926249	0.979981	1.01144	0.161047	0.572612	-1.17959	0.185544	0.716076	-1.16851	0.850939	0.688685
ssc-miR-365-5p_st	MIMAT0017179	mmu-miR-365-2-5p	1.07751	0.717584	0.798171	0.392573	0.247348	0.888613	0.74168	0.275004	0.312504	0.35998	0.924695	1.13982	0.259685	0.981945	1.17554	0.989479	0.883711	1.00187	0.436481	0.380256	-1.11743	0.798485	0.993609	-1.03693	0.879797	0.66443	-1.02303	0.367848	0.629755	1.14628	0.788336	0.844645	-1.03887	0.265124	0.511964	1.17335	0.374364	0.950953	1.14413	0.428867	0.666377	-1.11952	0.169862	0.716076	1.21895	0.256339	0.525018
ssc-miR-374a_st	MIMAT0000727	hsa-miR-374a-5p	1.09206	0.787821	0.833108	0.162585	0.172439	0.191037	0.65306	0.845364	0.438013	0.423593	0.924695	-1.13709	0.68915	0.981945	1.06605	0.362016	0.728236	-1.15788	0.971253	0.563045	-1.00577	0.816734	0.993609	1.03772	0.232938	0.532561	-1.2269	0.41763	0.657089	-1.14803	0.255422	0.626353	1.20155	0.193689	0.493027	1.23436	0.959799	0.979981	1.00857	0.380914	0.666377	1.15123	0.866066	0.893176	1.02731	0.305599	0.580638
ssc-miR-374b-5p_st	MIMAT0003727	mmu-miR-374b-5p	2.58752	0.934673	0.843961	0.0961294	0.131942	0.408516	0.714189	0.0387031	0.176827	0.164369	0.768505	1.50609	0.0279465	0.981945	1.94194	0.9222	0.871116	1.0287	0.292048	0.327531	-1.36088	0.482261	0.993609	1.22682	0.787635	0.64198	1.08635	0.144013	0.531457	1.57958	0.544478	0.748137	1.19259	0.0347583	0.357963	1.88776	0.169601	0.91338	1.53551	0.250822	0.635529	-1.39994	0.120406	0.716076	1.58291	0.413439	0.604511
ssc-miR-376a_st	MIMAT0000729	hsa-miR-376a-3p	1.09463	0.280002	0.638584	0.222413	0.199602	0.905135	0.746503	0.298658	0.314564	0.70657	0.937124	-1.04888	0.406071	0.981945	-1.11162	0.870849	0.871116	-1.0208	0.308019	0.342244	1.13907	0.475435	0.993609	1.095	0.181102	0.509502	1.20004	0.810459	0.735752	-1.03275	0.382283	0.70939	1.11778	0.502524	0.689392	-1.08896	0.930967	0.979981	-1.0117	0.239154	0.635529	1.16277	0.12797	0.716076	-1.21722	0.363183	0.581526
ssc-miR-378_st	MIMAT0000732	hsa-miR-378a-3p	13.1722	0.000787955	0.139407	0.00479965	0.0294488	0.990144	0.764003	0.0582926	0.224202	0.436518	0.924695	1.04966	0.816619	0.981945	1.01448	0.209324	0.632141	-1.08204	0.706539	0.494054	-1.02364	0.0242688	0.993609	-1.15699	0.00069811	0.101226	-1.27934	0.0747582	0.522869	-1.12788	0.284524	0.644344	-1.06926	0.139755	0.445551	1.09771	0.529245	0.978389	-1.04237	0.373791	0.666377	1.05706	0.0141047	0.671601	1.17374	0.698691	0.662915
ssc-miR-382_st	MIMAT0000737	hsa-miR-382-5p	1.99386	0.416776	0.689133	0.00796516	0.0354007	0.513061	0.714189	0.294077	0.314564	0.0919552	0.724422	1.70752	0.118977	0.981945	1.63767	0.787513	0.858953	1.08718	0.395969	0.371763	-1.30301	0.145981	0.993609	1.58209	0.463712	0.588336	-1.27374	0.741037	0.726153	1.11487	0.231726	0.626353	1.45522	0.192564	0.493027	1.50635	0.939022	0.979981	1.02547	0.266128	0.635529	-1.41661	0.911287	0.893176	1.03514	0.291519	0.568088
ssc-miR-383_st	MIMAT0017082	mmu-miR-383-3p	1.01752	0.210808	0.583792	0.124942	0.143318	0.77327	0.724898	0.112886	0.277334	0.102114	0.724422	-1.18485	0.0703315	0.981945	-1.20775	0.550524	0.821353	1.06261	0.699772	0.494054	-1.03994	0.925282	0.993609	-1.00956	0.248765	0.538371	-1.1337	0.557122	0.657089	1.0654	0.49033	0.729417	-1.07277	0.0189595	0.353911	-1.28337	0.98061	0.979981	1.00262	0.32859	0.658343	-1.10505	0.0848716	0.716076	-1.19631	0.499893	0.625694
ssc-miR-411_st	MIMAT0001093	mmu-miR-411-3p	1.3266	0.918538	0.843961	0.283257	0.217271	0.933988	0.750819	0.673054	0.424616	0.452629	0.924695	-1.14864	0.890876	0.981945	1.02552	0.946549	0.881795	-1.01239	0.445659	0.380256	-1.15113	0.697749	0.993609	1.07402	0.566822	0.601651	-1.11836	0.340075	0.629755	-1.20594	0.649035	0.812965	1.08732	0.838205	0.806576	1.03822	0.372309	0.950953	-1.19118	0.486099	0.676312	-1.13705	0.801424	0.893176	-1.04729	0.190587	0.474906
ssc-miR-423-3p_st	MIMAT0001340	hsa-miR-423-3p	8.04578	0.021128	0.55446	0.0703739	0.113245	0.0105888	0.524579	0.222941	0.30352	0.0786141	0.720774	1.21451	0.401958	0.981945	-1.09498	0.999852	0.884485	-1.00002	0.131309	0.246204	-1.18007	0.0418665	0.993609	-1.25468	0.0570044	0.383882	-1.25117	0.20566	0.574688	-1.15771	0.0418832	0.482647	-1.25465	0.40206	0.635134	-1.09496	0.20572	0.950953	-1.15769	0.131353	0.540707	-1.18004	0.211886	0.716076	1.14584	0.482842	0.625694
ssc-miR-423-5p_st	MIMAT0004748	hsa-miR-423-5p	8.07352	0.402855	0.685331	0.50509	0.292806	0.496588	0.714189	0.326431	0.323199	0.584917	0.937124	-1.10107	0.471615	0.981945	-1.13556	0.459582	0.787303	-1.13955	0.267366	0.327531	-1.21783	0.0483056	0.993609	-1.43185	0.0659123	0.383882	-1.42335	0.441773	0.657089	-1.15509	0.200325	0.626353	-1.2565	0.984084	0.806576	1.00351	0.942136	0.979981	-1.01363	0.705909	0.711715	-1.06869	0.193686	0.716076	1.26092	0.254654	0.525018
ssc-miR-424_st	MIMAT0001341	hsa-miR-424-5p	1.00047	0.438737	0.704615	0.499963	0.292767	0.400514	0.714189	0.718154	0.427472	0.78141	0.937124	-1.03649	0.227056	0.981945	1.17101	0.381374	0.746519	1.12044	0.258133	0.327531	1.15899	0.601121	0.993609	1.06998	0.515529	0.588336	1.09346	0.888327	0.759754	1.01941	0.72133	0.837297	-1.04717	0.732636	0.789682	1.04513	0.491782	0.978389	-1.09911	0.79338	0.723232	1.03441	0.486326	0.825601	1.09442	0.723928	0.662915
ssc-miR-424-star_st	MIMAT0004749	hsa-miR-424-3p	3.80152	0.0963699	0.576119	0.0066154	0.0343021	0.493127	0.714189	0.0820224	0.273408	0.352399	0.924695	1.44621	0.241463	0.981945	1.59476	0.413465	0.771904	-1.38253	0.0435974	0.15737	-2.27707	0.0999204	0.993609	-1.94074	0.0736429	0.383882	-2.15527	0.531403	0.657089	-1.29993	0.3921	0.720184	-1.40376	0.0519227	0.383183	2.2048	0.88278	0.979981	1.06354	0.21121	0.602084	-1.64703	0.00704736	0.671601	3.09501	0.341084	0.581526
ssc-miR-425-3p_st	MIMAT0001343	hsa-miR-425-3p	6.21502	0.200997	0.583792	0.187806	0.18487	0.289019	0.714189	0.200712	0.295164	0.233295	0.853657	1.20178	0.278144	0.981945	-1.18163	0.600559	0.846316	-1.08325	0.535948	0.424309	-1.09923	0.274239	0.993609	-1.18327	0.073693	0.383882	-1.34585	0.538909	0.657089	-1.10475	0.563236	0.753171	-1.09234	0.569361	0.721361	-1.09082	0.903202	0.979981	-1.01985	0.923408	0.736096	-1.01476	0.992721	0.893176	1.00139	0.671386	0.662915
ssc-miR-425-5p_st	MIMAT0003393	hsa-miR-425-5p	8.29507	0.0793467	0.576119	0.133647	0.148496	0.943217	0.750819	0.249135	0.30352	0.963381	0.944005	-1.00484	0.909285	0.981945	-1.01206	0.807268	0.858953	-1.02601	0.0449258	0.15737	-1.24401	0.270664	0.993609	1.12421	0.702045	0.636229	-1.04367	0.619972	0.690037	1.05701	0.181363	0.626353	1.15345	0.896485	0.806576	1.01378	0.469175	0.978389	1.0845	0.0746772	0.464597	-1.21247	0.225631	0.716076	-1.13777	0.581677	0.662915
ssc-miR-429_st	MIMAT0001537	mmu-miR-429-3p	1.13181	0.341371	0.64958	0.184032	0.18487	0.871832	0.738059	0.534201	0.389756	0.24307	0.857255	-1.20137	0.368034	0.981945	-1.1512	0.109313	0.632141	-1.28951	0.517391	0.416691	-1.1062	0.926697	0.993609	1.0144	0.490626	0.588336	-1.1208	0.105644	0.522869	-1.31342	0.0915614	0.546715	1.30807	0.467228	0.669038	1.12014	0.911203	0.979981	-1.01855	0.327599	0.658343	1.16571	0.322121	0.744229	-1.16778	0.0893184	0.386066
ssc-miR-432-5p_st	MIMAT0002814	hsa-miR-432-5p	2.07898	0.530936	0.746766	0.0597023	0.0996152	0.302185	0.714189	0.537863	0.389756	0.16176	0.768505	1.41794	0.727738	0.981945	1.08931	0.908346	0.871116	1.02867	0.1789	0.277465	-1.39799	0.918167	0.993609	1.02554	0.578193	0.601651	-1.1562	0.787465	0.726153	-1.07276	0.990118	0.859406	-1.00304	0.815569	0.801261	1.05895	0.70553	0.978389	-1.10351	0.146023	0.540707	-1.43807	0.80598	0.893176	1.06218	0.714193	0.662915
ssc-miR-4331_st	MIMAT0025464	hsa-miR-6504-5p	6.03893	0.0532763	0.55446	0.119468	0.141144	0.144883	0.649253	0.268542	0.308719	0.0168792	0.582516	-2.02699	0.513646	0.981945	-1.20271	0.490896	0.792323	-1.21501	0.487782	0.406485	1.21672	0.672505	0.993609	1.1266	0.593353	0.601651	1.17335	0.971776	0.774679	-1.01062	0.269786	0.644344	1.36883	0.971183	0.806576	1.01022	0.53872	0.978389	1.20224	0.171787	0.572983	1.47833	0.285298	0.716076	-1.35497	0.664411	0.662915
ssc-miR-4332_st	MIMAT0013803	mmu-miR-2861	5.48851	0.180302	0.583792	0.456566	0.273159	0.910698	0.74724	0.908691	0.458145	0.174747	0.768505	1.41083	0.339113	0.981945	1.27192	0.313951	0.691969	1.28864	0.215265	0.307522	1.36816	0.922084	0.993609	1.02472	0.510271	0.588336	1.19125	0.344775	0.629755	1.28672	0.362082	0.699099	-1.25755	0.958284	0.806576	-1.01315	0.99551	0.979981	-1.00149	0.810564	0.728058	1.06171	0.389719	0.768721	1.24123	0.392871	0.60125
ssc-miR-4334-3p_st	MIMAT0000584	mmu-miR-339-5p	7.48513	0.621012	0.746766	0.356925	0.240203	0.315254	0.714189	0.0106245	0.106245	0.404182	0.924695	1.09917	0.468958	0.981945	-1.08542	0.133595	0.632141	1.18803	0.0813994	0.196883	1.22325	0.0718879	0.993609	1.23182	0.14007	0.490266	1.1968	0.332169	0.629755	-1.12393	0.74829	0.840485	1.03685	0.0301963	0.357963	-1.28951	0.0208416	0.443071	-1.33527	0.795555	0.723232	1.02964	0.0143548	0.671601	-1.33704	0.0101294	0.307934
ssc-miR-4334-5p_st	ssc-miR-4334-5p_st	ssc-miR-4334-5p_st	5.10323	0.508497	0.737416	0.278306	0.217271	0.533832	0.714189	0.170792	0.293123	0.961129	0.944005	-1.01891	0.636606	0.981945	1.19951	0.859839	0.871116	1.07024	0.287574	0.327531	-1.51081	0.651511	0.993609	-1.18992	0.0767763	0.383882	-2.09783	0.611648	0.685511	1.23049	0.530671	0.741247	-1.27349	0.766852	0.791632	1.12079	0.732375	0.978389	1.14974	0.217102	0.602084	-1.61693	0.357999	0.768721	1.42732	0.3531	0.581526
ssc-miR-4337_st	ssc-miR-4337_st	ssc-miR-4337_st	1.03108	0.170236	0.583792	0.991743	0.445013	0.397302	0.714189	0.467136	0.371269	0.0873124	0.724422	1.21428	0.15841	0.981945	1.17221	0.07928	0.632141	1.22085	0.811677	0.511816	1.02676	0.540389	0.993609	1.07039	0.297912	0.549486	1.13136	0.556213	0.657089	1.0718	0.240562	0.626353	-1.14056	0.713884	0.789682	-1.04149	0.272616	0.950953	-1.13906	0.125458	0.540707	-1.18904	0.414668	0.776022	1.09512	0.991097	0.724263
ssc-miR-4338_st	ssc-miR-4338_st	ssc-miR-4338_st	1.00864	0.88557	0.843961	0.265249	0.213419	0.712407	0.724898	0.746452	0.42794	0.483953	0.924695	1.09512	0.83883	0.981945	1.02665	0.319386	0.691969	-1.13861	0.766197	0.510798	-1.03922	0.994275	0.994275	1.00093	0.758649	0.64198	-1.04306	0.835491	0.737865	1.02889	0.315997	0.661389	1.13966	0.232835	0.504978	1.16895	0.253561	0.950953	1.1715	0.481687	0.676312	1.09564	0.844436	0.893176	1.0257	0.840772	0.688685
ssc-miR-4339_st	MIMAT0014860	mmu-miR-3076-5p	4.53225	0.311263	0.640345	0.467782	0.278087	0.993204	0.764003	0.188197	0.293123	0.860199	0.937124	1.1016	0.661124	0.981945	1.27274	0.700473	0.858953	-1.23561	0.381195	0.365947	-1.62277	0.124425	0.993609	-2.36568	0.167916	0.507245	-2.26245	0.779606	0.726153	1.1772	0.242469	0.626353	-1.91459	0.412464	0.635725	1.57261	0.521574	0.978389	1.45456	0.620452	0.694212	-1.31334	0.0520108	0.716076	3.01091	0.0864345	0.386066
ssc-miR-450b-5p_st	MIMAT0004909	hsa-miR-450b-5p	1.2424	0.988826	0.843961	0.252408	0.207024	0.450463	0.714189	0.70672	0.427472	0.610946	0.937124	-1.08766	0.849104	0.981945	-1.03186	0.817939	0.858953	-1.03869	0.784281	0.511816	-1.04618	0.501774	0.993609	1.11754	0.240234	0.532561	-1.23086	0.542991	0.657089	-1.11257	0.368969	0.699099	1.16077	0.96811	0.806576	1.00661	0.694643	0.978389	-1.07113	0.96521	0.760756	-1.00721	0.390229	0.768721	-1.15315	0.21869	0.503651
ssc-miR-451_st	MIMAT0001631	hsa-miR-451a	8.46184	0.357363	0.665535	0.117927	0.141144	0.149126	0.649253	0.583704	0.395221	0.797977	0.937124	-1.07903	0.244675	0.981945	1.41837	0.23523	0.632141	-1.42871	0.879668	0.538572	-1.046	0.217797	0.993609	1.44884	0.659981	0.625472	1.14891	0.82352	0.737865	-1.07281	0.0194135	0.439106	2.06997	0.022912	0.357963	2.02643	0.366425	0.950953	1.33174	0.298218	0.658343	1.36588	0.942938	0.893176	-1.02149	0.168291	0.456789
ssc-miR-455_st	MIMAT0004784	hsa-miR-455-3p	8.65491	0.848168	0.843961	0.517416	0.297464	0.14121	0.649253	0.458954	0.370124	0.165467	0.768505	1.22845	0.784441	0.981945	-1.04076	0.714619	0.858953	1.05488	0.597416	0.45088	1.08032	0.977341	0.994275	1.00415	0.137991	0.490266	1.26359	0.996031	0.778149	1.00077	0.735857	0.840485	-1.05052	0.523743	0.700607	-1.09787	0.733984	0.978389	-1.05407	0.870316	0.736096	1.02412	0.762744	0.893176	-1.04508	0.982604	0.721526
ssc-miR-484_st	MIMAT0003283	hsa-miR-615-3p	2.22546	0.992205	0.843961	0.892232	0.423594	0.484554	0.714189	0.567314	0.395221	0.655772	0.937124	-1.13276	0.171695	0.981945	-1.47357	0.763154	0.858953	-1.08784	0.412038	0.371763	-1.25901	0.322787	0.993609	-1.32093	0.164121	0.507245	-1.52019	0.64828	0.705252	-1.1449	0.488572	0.729417	-1.21427	0.281731	0.526043	-1.35458	0.862976	0.979981	-1.05245	0.601517	0.69219	-1.15735	0.69568	0.893176	-1.11555	0.629771	0.662915
ssc-miR-486_st	MIMAT0002177	hsa-miR-486-5p	11.6332	0.580777	0.746766	0.985371	0.444712	0.817625	0.730934	0.0791901	0.273069	0.105673	0.724422	1.20377	0.702724	0.981945	-1.04377	0.432584	0.787303	1.09246	0.94666	0.559602	-1.00753	0.894715	0.993609	1.01495	0.463034	0.588336	-1.09161	0.163525	0.531457	1.18343	0.513017	0.740794	-1.07637	0.246962	0.505971	-1.14027	0.502751	0.978389	1.08327	0.395015	0.666377	-1.10069	0.60772	0.893176	-1.05937	0.202657	0.48131
ssc-miR-487b_st	MIMAT0026614	hsa-miR-487b-5p	1.00171	0.042008	0.55446	0.109697	0.140432	0.176877	0.649253	0.436835	0.361021	0.762639	0.937124	1.03199	0.0499365	0.981945	1.23503	0.31966	0.691969	1.11023	0.438691	0.380256	1.08448	0.201349	0.993609	1.14453	0.463637	0.588336	-1.08477	0.48282	0.657089	-1.081	0.770444	0.840485	1.03089	0.31081	0.555491	1.11241	0.106391	0.894707	-1.20015	0.821902	0.728058	-1.02374	0.467153	0.818399	1.07907	0.061544	0.334096
ssc-miR-490_st	MIMAT0004764	hsa-miR-490-5p	1.21573	0.43594	0.704615	0.0173842	0.0559348	0.172614	0.649253	0.95812	0.469666	0.698013	0.937124	1.0545	0.996891	0.999331	-1.00053	0.259464	0.632141	-1.16848	0.131015	0.246204	-1.23407	0.364536	0.993609	-1.13284	0.387424	0.57914	-1.1343	0.0579571	0.470901	-1.32746	0.820661	0.857757	1.03146	0.261061	0.50998	1.16786	0.38173	0.950953	-1.13605	0.689704	0.711715	-1.05613	0.366558	0.768721	1.13224	0.278636	0.550035
ssc-miR-491_st	MIMAT0002807	hsa-miR-491-5p	6.77828	0.0340471	0.55446	0.610278	0.327352	0.207074	0.654565	0.0357699	0.176827	0.673326	0.937124	1.0504	0.960448	0.981945	-1.00579	0.0492039	0.632141	1.26711	0.290202	0.327531	-1.13241	0.438487	0.993609	-1.09492	0.0584329	0.383882	-1.27253	0.738299	0.726153	-1.04217	0.00812296	0.303077	-1.38738	0.0442518	0.357963	-1.27445	0.0305639	0.520123	-1.32055	0.00391009	0.0893735	-1.43488	0.467924	0.818399	1.08862	0.689745	0.662915
ssc-miR-494_st	MIMAT0026607	hsa-miR-494-5p	1.13977	0.0503811	0.55446	0.0766519	0.117282	0.640371	0.714189	0.304208	0.314564	0.927873	0.944005	-1.00928	0.486208	0.981945	1.07399	0.813865	0.858953	1.02434	0.607492	0.455619	1.05396	0.340781	0.993609	1.10296	0.0119335	0.311319	1.33298	0.106301	0.522869	1.19577	0.470762	0.72425	1.07675	0.643491	0.766713	1.04847	0.159892	0.91338	1.16736	0.780194	0.723232	1.02892	0.794394	0.893176	-1.02698	0.457632	0.625694
ssc-miR-497_st	MIMAT0002820	hsa-miR-497-5p	7.38515	0.204807	0.583792	0.0424348	0.0808282	0.166886	0.649253	0.0103998	0.106245	0.691712	0.937124	1.04949	0.75666	0.981945	1.03845	0.781723	0.858953	1.0343	0.0293601	0.140929	1.31788	0.348082	0.993609	-1.12188	0.0154138	0.319286	1.38921	0.281555	0.629755	-1.15064	0.227216	0.626353	-1.16036	0.97378	0.806576	1.00401	0.183916	0.938939	-1.19011	0.0536799	0.454822	1.27417	0.215268	0.716076	1.16501	0.844508	0.688685
ssc-miR-499-3p_st	MIMAT0004772	hsa-miR-499a-3p	1.98051	0.451191	0.707276	0.689917	0.360619	0.0965419	0.649253	0.0924826	0.277334	0.805145	0.937124	-1.06237	0.660211	0.981945	1.11398	0.485194	0.79005	-1.18743	0.224837	0.317416	-1.35156	0.462723	0.993609	-1.19822	0.107461	0.458289	1.53394	0.269507	0.629755	-1.33651	0.970586	0.857757	-1.00908	0.258927	0.50998	1.32277	0.649753	0.978389	-1.12555	0.598236	0.69219	-1.13822	0.244182	0.716076	1.33478	0.674845	0.662915
ssc-miR-499-5p_st	MIMAT0002870	hsa-miR-499a-5p	7.97898	0.340898	0.64958	0.194113	0.18487	0.698908	0.724898	0.815621	0.438013	0.82495	0.937124	-1.07455	0.874877	0.981945	-1.05251	0.160807	0.632141	-1.58938	0.29011	0.327531	-1.41483	0.883223	0.993609	-1.04889	0.877876	0.66443	1.0544	0.393686	0.649754	-1.34417	0.206981	0.626353	1.5153	0.210666	0.504978	1.51009	0.627501	0.978389	1.18243	0.720612	0.711715	1.12337	0.991552	0.893176	-1.00345	0.473626	0.625694
ssc-miR-500_st	MIMAT0002871	hsa-miR-500a-3p	3.3332	0.207142	0.583792	0.0300461	0.067452	0.856758	0.734915	0.434172	0.361021	0.281917	0.874739	1.56861	0.228306	0.981945	1.65749	0.573108	0.833939	-1.26374	0.327461	0.347746	-1.50532	0.58874	0.993609	-1.25176	0.236126	0.532561	-1.69357	0.948721	0.774679	-1.02867	0.981655	0.857757	1.00957	0.0819918	0.445551	2.09464	0.64014	0.978389	1.22853	0.673318	0.711715	-1.19116	0.0858107	0.716076	2.07478	0.655642	0.662915
ssc-miR-503_st	MIMAT0003188	mmu-miR-503-5p	4.16649	0.401834	0.685331	0.0191777	0.0559348	0.550058	0.714189	0.947738	0.466866	0.957712	0.944005	-1.0192	0.848867	0.981945	-1.07076	0.117459	0.632141	-1.77418	0.0692039	0.191025	-1.95491	0.946005	0.993609	-1.02459	0.590369	0.601651	-1.22788	0.214994	0.582275	-1.61269	0.133171	0.626353	1.7316	0.166012	0.464834	1.65693	0.802025	0.979981	1.10014	0.786935	0.723232	-1.10187	0.902202	0.893176	-1.04506	0.238631	0.510871
ssc-miR-504_st	MIMAT0002875	hsa-miR-504-5p	4.98343	0.217454	0.583792	0.297421	0.220312	0.158422	0.649253	0.160031	0.293123	0.258839	0.866452	1.72238	0.888621	0.981945	1.069	0.869438	0.871116	-1.08146	0.164372	0.274006	-1.96077	0.0824616	0.993609	-2.33671	0.311563	0.549486	-1.67487	0.994282	0.778149	-1.00363	0.113367	0.618366	-2.16069	0.760942	0.791632	1.15608	0.882489	0.979981	1.07756	0.21753	0.602084	-1.81307	0.0620942	0.716076	2.49794	0.102034	0.39767
ssc-miR-505_st	MIMAT0002876	hsa-miR-505-3p	1.82378	0.289697	0.638584	0.417931	0.256624	0.724832	0.724898	0.018211	0.113819	0.236759	0.853657	1.25914	0.723199	0.981945	-1.07062	0.231839	0.632141	-1.26228	0.243329	0.327531	-1.25502	0.653918	0.993609	-1.09028	0.454961	0.588336	-1.16561	0.0807369	0.522869	1.44181	0.448782	0.72425	1.15776	0.395082	0.635134	1.17902	0.0059894	0.407699	1.81997	0.976092	0.76277	1.00578	0.924698	0.893176	1.01836	0.0330609	0.317509
ssc-miR-532-3p_st	MIMAT0004780	hsa-miR-532-3p	4.05707	0.135712	0.576119	0.135881	0.149203	0.0965898	0.649253	0.113273	0.277334	0.0294589	0.582516	2.17463	0.465111	0.981945	1.28582	0.501984	0.799079	1.25973	0.182665	0.277465	-1.58963	0.498419	0.993609	-1.26218	0.683636	0.629967	-1.15985	0.777248	0.726153	1.10835	0.182444	0.626353	-1.59001	0.952295	0.806576	1.02071	0.724894	0.978389	-1.13658	0.0498463	0.454822	-2.0025	0.164422	0.716076	1.62294	0.358996	0.581526
ssc-miR-532-5p_st	MIMAT0002888	hsa-miR-532-5p	6.39838	0.961224	0.843961	0.955387	0.437105	0.862889	0.734915	0.537671	0.389756	0.985333	0.944005	-1.00297	0.387526	0.981945	-1.1505	0.361815	0.728236	-1.15959	0.923322	0.553993	-1.01564	0.26669	0.993609	-1.19837	0.431945	0.588336	-1.14464	0.968025	0.774679	-1.00688	0.838379	0.857757	-1.03344	0.961108	0.806576	1.00789	0.411618	0.950953	1.15166	0.413665	0.666377	1.14173	0.800525	0.893176	1.0416	0.312798	0.581526
ssc-miR-542-3p_st	MIMAT0003172	mmu-miR-542-3p	1.04545	0.0341444	0.55446	0.891938	0.423594	0.966039	0.753982	0.692491	0.427464	0.1202	0.741859	1.22881	0.135031	0.981945	1.2188	0.0736332	0.632141	1.26973	0.148039	0.261246	1.21079	0.242709	0.993609	1.16593	0.469527	0.588336	1.10527	0.94723	0.774679	-1.00916	0.51302	0.740794	-1.08902	0.752848	0.791632	-1.04179	0.0796185	0.774869	-1.28136	0.714737	0.711715	-1.04868	0.733081	0.893176	1.04534	0.243256	0.513541
ssc-miR-542-5p_st	MIMAT0003171	mmu-miR-542-5p	3.09543	0.122486	0.576119	0.0137043	0.0511627	0.11596	0.649253	0.579657	0.395221	0.0550255	0.679221	2.20229	0.871623	0.981945	1.06657	0.973081	0.883711	1.01355	0.189416	0.283107	-1.70062	0.806146	0.993609	-1.10286	0.287162	0.549486	-1.5754	0.339875	0.629755	-1.50198	0.780178	0.84091	-1.1178	0.898252	0.806576	1.05232	0.324389	0.950953	-1.52233	0.17876	0.583708	-1.72366	0.684309	0.893176	1.17628	0.467188	0.625694
ssc-miR-545_st	MIMAT0003165	hsa-miR-545-3p	1.06616	0.564602	0.746766	0.288636	0.218129	0.200988	0.654565	0.234058	0.30352	0.662984	0.937124	-1.04532	0.31648	0.981945	-1.10802	0.104273	0.632141	1.18375	0.859572	0.532609	1.01813	0.889731	0.993609	1.01418	0.930732	0.670108	-1.00941	0.42771	0.657089	-1.08966	0.135153	0.626353	-1.1672	0.0114484	0.323489	-1.31161	0.0236799	0.443071	-1.28988	0.144884	0.540707	-1.16267	0.255779	0.716076	-1.12373	0.356822	0.581526
ssc-miR-574_st	MIMAT0003239	hsa-miR-574-3p	8.76908	0.0404137	0.55446	0.882257	0.423594	0.841979	0.734915	0.452389	0.367796	0.0430731	0.607638	1.38267	0.322972	0.981945	1.16665	0.608897	0.846316	1.08254	0.0861093	0.196883	1.31284	0.944342	0.993609	-1.01086	0.733762	0.637911	1.05744	0.514808	0.657089	1.1132	0.561282	0.753171	-1.09429	0.629205	0.766713	1.0777	0.864841	0.979981	1.02832	0.218256	0.602084	1.21274	0.290804	0.716076	1.17931	0.473733	0.625694
ssc-miR-615_st	MIMAT0003283	hsa-miR-615-3p	1.03958	0.18681	0.583792	0.364114	0.241021	0.773668	0.724898	0.638023	0.411586	0.841629	0.937124	-1.02904	0.457957	0.981945	-1.11271	0.149753	0.632141	-1.23364	0.119051	0.230421	-1.25597	0.464766	0.993609	-1.1109	0.535483	0.592711	-1.09904	0.885492	0.759754	1.02212	0.466359	0.72425	1.11048	0.47324	0.669038	1.10868	0.134289	0.894707	1.26093	0.900303	0.736096	-1.01811	0.990946	0.893176	-1.00163	0.405695	0.604511
ssc-miR-628_st	MIMAT0004809	hsa-miR-628-5p	3.2579	0.462143	0.71665	0.035819	0.0726762	0.0741263	0.649253	0.1248	0.277334	0.0261851	0.582516	2.21111	0.014805	0.981945	2.40443	0.862935	0.871116	-1.06085	0.818905	0.511816	1.08151	0.130553	0.993609	1.69443	0.89443	0.670108	1.04933	0.1094	0.522869	1.81059	0.0941564	0.546715	1.79754	0.00975389	0.323489	2.55074	0.0796837	0.774869	1.92077	0.688279	0.711715	1.14732	0.310492	0.726329	1.41902	0.85503	0.688685
ssc-miR-652_st	MIMAT0022709	hsa-miR-652-5p	4.79102	0.0258813	0.55446	0.00440502	0.0294488	0.135862	0.649253	0.820493	0.438013	0.671139	0.937124	1.20932	0.526659	0.981945	1.32834	0.785297	0.858953	-1.12957	0.169382	0.275696	-1.86662	0.36248	0.993609	-1.50664	0.140894	0.490266	-2.03608	0.0099856	0.332444	-3.64419	0.520725	0.740794	-1.33382	0.367253	0.610877	1.50046	0.0184797	0.443071	-3.22618	0.266097	0.635529	-1.6525	0.127997	0.716076	2.00134	0.0700285	0.343365
ssc-miR-664-3p_st	MIMAT0022272	hsa-miR-664b-3p	1.223	0.793315	0.833108	0.209488	0.195522	0.54545	0.714189	0.162516	0.293123	0.888148	0.94306	1.0168	0.5331	0.981945	1.07686	0.153557	0.632141	-1.1876	0.372576	0.363489	-1.11215	0.19687	0.993609	-1.16765	0.275759	0.549486	-1.14829	0.739882	0.726153	1.04262	0.886236	0.857757	1.01709	0.0447454	0.357963	1.27888	0.0965659	0.894707	1.23822	0.580349	0.69219	1.06784	0.0605247	0.716076	1.25739	0.124717	0.428306
ssc-miR-664-5p_st	MIMAT0005948	hsa-miR-664a-5p	8.16028	0.253666	0.623324	0.691615	0.360619	0.341997	0.714189	0.212137	0.302501	0.697143	0.937124	1.06103	0.65695	0.981945	-1.06997	0.364118	0.728236	1.14905	0.509968	0.416691	-1.10576	0.184656	0.993609	-1.22716	0.223004	0.531943	-1.22016	0.655892	0.705252	1.07462	0.0299286	0.452083	-1.41007	0.180811	0.482164	-1.22945	0.67837	0.978389	-1.06926	0.122683	0.540707	-1.27058	0.370493	0.768721	1.14691	0.0938694	0.386066
ssc-miR-676-3p_st	MIMAT0018204	hsa-miR-676-3p	3.2876	0.747671	0.821616	0.0327275	0.0694219	0.863525	0.734915	0.364452	0.336461	0.613905	0.937124	1.29126	0.306759	0.981945	1.68424	0.409706	0.771904	-1.52075	0.0821089	0.196883	-2.46431	0.994007	0.994275	1.0038	0.818372	0.648107	-1.13111	0.867938	0.750213	-1.09328	0.405525	0.72425	1.52654	0.0704346	0.445551	2.56131	0.539562	0.978389	1.391	0.343367	0.661912	-1.62045	0.310235	0.726329	1.67786	0.862373	0.689446
ssc-miR-7_st	MIMAT0000252	hsa-miR-7-5p	2.2581	0.42827	0.701582	0.0131848	0.0511627	0.483087	0.714189	0.683632	0.424616	0.715146	0.937124	-1.10727	0.619354	0.981945	1.14893	0.116947	0.632141	-1.56275	0.0561564	0.16436	-1.73232	0.954861	0.993609	-1.01591	0.200287	0.509502	-1.46837	0.732587	0.726153	-1.10647	0.129922	0.626353	1.53828	0.0427359	0.357963	1.79549	0.248439	0.950953	1.41238	0.712168	0.711715	-1.1085	0.580279	0.893176	1.16721	0.773	0.675265
ssc-miR-708-5p_st	MIMAT0004828	mmu-miR-708-5p	2.90062	0.798286	0.833108	0.00504836	0.0294488	0.78569	0.724898	0.434239	0.361021	0.237727	0.853657	1.55684	0.78838	0.981945	-1.10463	0.0638974	0.632141	-2.02772	0.143467	0.260337	-1.73673	0.967288	0.993609	-1.01531	0.257396	0.540904	-1.56823	0.51738	0.657089	-1.29087	0.0694892	0.483603	1.99714	0.10874	0.445551	1.83566	0.255691	0.950953	1.57082	0.676324	0.711715	1.16755	0.820059	0.893176	-1.08797	0.542452	0.659622
ssc-miR-744_st	MIMAT0004187	mmu-miR-744-5p	6.17356	0.59366	0.746766	0.0879755	0.128298	0.338166	0.714189	0.516841	0.389422	0.485726	0.924695	1.19324	0.964407	0.981945	1.01133	0.667399	0.858953	-1.11475	0.0955287	0.198944	-1.53848	0.37892	0.993609	-1.25049	0.255822	0.540904	-1.36008	0.712725	0.726153	-1.10371	0.649477	0.812965	-1.12177	0.635418	0.766713	1.12737	0.970361	0.979981	1.01	0.207893	0.602084	-1.38011	0.355693	0.768721	1.26466	0.641539	0.662915
ssc-miR-769-3p_st	MIMAT0003887	hsa-miR-769-3p	3.06326	0.633127	0.746766	0.0191164	0.0559348	0.684305	0.724898	0.258491	0.306409	0.167172	0.768505	1.71343	0.896197	0.981945	1.05132	0.164816	0.632141	-1.71875	0.433776	0.380256	-1.35229	0.872965	0.993609	-1.06326	0.146236	0.490266	-1.82543	0.940957	0.774679	1.03059	0.216475	0.626353	1.61649	0.130338	0.445551	1.80697	0.166761	0.91338	1.77134	0.533191	0.69219	1.271	0.771658	0.893176	1.11783	0.822169	0.686798
ssc-miR-769-5p_st	MIMAT0003886	hsa-miR-769-5p	2.11981	0.611052	0.746766	0.226186	0.199737	0.143799	0.649253	0.828128	0.438013	0.913504	0.944005	1.03713	0.316725	0.981945	-1.40338	0.425601	0.783105	-1.30844	0.288256	0.327531	-1.43308	0.93248	0.993609	-1.02884	0.983349	0.694456	-1.00746	0.134777	0.526059	-1.72044	0.475705	0.725651	1.27176	0.834731	0.806576	-1.07256	0.444146	0.978389	-1.31488	0.786429	0.723232	-1.09526	0.358392	0.768721	-1.36404	0.15566	0.438153
ssc-miR-885-3p_st	MIMAT0004948	hsa-miR-885-3p	1.48525	0.959348	0.843961	0.544516	0.306154	0.416542	0.714189	0.176452	0.293123	0.994193	0.944005	-1.00137	0.906435	0.981945	-1.02243	0.943623	0.881795	-1.01343	0.0716344	0.191025	-1.4183	0.219539	0.993609	-1.26447	0.315019	0.549486	-1.22485	0.723268	0.726153	1.07352	0.246236	0.626353	-1.24771	0.962649	0.806576	-1.00888	0.674109	0.978389	1.08794	0.0825477	0.465133	-1.3995	0.265186	0.716076	1.23673	0.13412	0.428306
ssc-miR-885-5p_st	MIMAT0004947	hsa-miR-885-5p	1.90914	0.964134	0.843961	0.880876	0.423594	0.50577	0.714189	0.584322	0.395221	0.326488	0.895574	1.34452	0.352817	0.981945	1.32325	0.765242	0.858953	1.09355	0.934897	0.555385	1.02475	0.625772	0.993609	1.15747	0.789877	0.64198	1.08831	0.180706	0.566587	1.5394	0.849481	0.857757	1.05845	0.525455	0.700607	1.21005	0.285962	0.950953	1.40771	0.828166	0.728058	-1.06714	0.65521	0.893176	1.14322	0.372206	0.58325
ssc-miR-92a_st	MIMAT0000092	hsa-miR-92a-3p	11.2011	0.822304	0.837128	0.11323	0.141144	0.541703	0.714189	0.359112	0.336461	0.236036	0.853657	1.13627	0.727167	0.981945	1.03791	0.956396	0.881795	-1.00584	0.510963	0.416691	-1.07281	0.241491	0.993609	1.13455	0.504907	0.588336	-1.07856	0.440596	0.657089	1.09153	0.220954	0.626353	1.14118	0.686669	0.789682	1.04397	0.411125	0.950953	1.0979	0.546369	0.69219	-1.06658	0.406059	0.770059	-1.09311	0.732509	0.662915
ssc-miR-92b-3p_st	MIMAT0003218	hsa-miR-92b-3p	4.4178	0.496132	0.731477	0.94515	0.435479	0.310566	0.714189	0.236296	0.30352	0.542855	0.937124	1.16754	0.560446	0.981945	1.1597	0.415318	0.771904	1.23106	0.743537	0.506957	-1.08665	0.211225	0.993609	1.37919	0.929594	0.670108	-1.02407	0.0777223	0.522869	1.62836	0.654888	0.812965	1.12033	0.814055	0.801261	-1.06153	0.303076	0.950953	1.32273	0.256715	0.635529	-1.33773	0.496267	0.825601	-1.18926	0.538517	0.659622
ssc-miR-92b-5p_st	MIMAT0017278	mmu-miR-92b-5p	4.58587	0.654522	0.753708	0.947167	0.435479	0.800794	0.728517	0.231527	0.30352	0.594013	0.937124	-1.22824	0.744494	0.981945	1.13372	0.201751	0.632141	-1.64545	0.626872	0.456389	-1.20613	0.171967	0.993609	-1.70564	0.969232	0.692309	1.01587	0.790948	0.726153	1.11432	0.925615	0.857757	-1.03658	0.112686	0.445551	1.86549	0.144583	0.894707	1.83355	0.422056	0.666377	1.36424	0.0942215	0.716076	1.93372	0.123051	0.428306
ssc-miR-935_st	MIMAT0004978	hsa-miR-935	1.58835	0.630479	0.746766	0.645289	0.342199	0.642759	0.714189	0.0179428	0.113819	0.0061703	0.582516	1.66979	0.108803	0.981945	1.33327	0.65007	0.858953	1.08302	0.956912	0.560143	1.00953	0.626953	0.993609	1.08922	0.121717	0.490266	1.34176	0.0789179	0.522869	1.39899	0.974045	0.857757	1.00573	0.24163	0.504978	1.23107	0.175698	0.919986	1.29175	0.689242	0.711715	-1.0728	0.254508	0.716076	1.22406	0.185236	0.474906
ssc-miR-95_st	MIMAT0000094	hsa-miR-95-3p	2.30154	0.341007	0.64958	0.0128142	0.0511627	0.539923	0.714189	0.372878	0.33898	0.312862	0.882717	1.39977	0.0931142	0.981945	1.76514	0.341164	0.728236	-1.37285	0.335137	0.349709	-1.37841	0.83069	0.993609	-1.07322	0.41244	0.586311	-1.33487	0.937956	0.774679	-1.02765	0.458184	0.72425	1.27918	0.0112405	0.323489	2.42327	0.411196	0.950953	1.33591	0.990243	0.766295	-1.00405	0.0605656	0.716076	1.89439	0.901468	0.701257
ssc-miR-98_st	MIMAT0000096	hsa-miR-98-5p	5.8329	0.451734	0.707276	0.394874	0.247348	0.208642	0.654565	0.29906	0.314564	0.82345	0.937124	1.03641	0.294137	0.981945	1.18493	0.457542	0.787303	-1.12705	0.887038	0.540328	-1.02303	0.434548	0.993609	-1.13413	0.272401	0.549486	-1.20739	0.454875	0.657089	1.13612	0.968808	0.857757	-1.00629	0.0786874	0.445551	1.33548	0.152859	0.91338	1.28046	0.546875	0.69219	1.10168	0.0727399	0.716076	1.34387	0.143065	0.428306
ssc-miR-99a_st	MIMAT0000097	hsa-miR-99a-5p	10.7777	0.807717	0.833108	0.432895	0.264075	0.343247	0.714189	0.517931	0.389422	0.436271	0.924695	1.06492	0.761511	0.981945	-1.02471	0.248576	0.632141	1.09834	0.652824	0.471921	-1.03688	0.877091	0.993609	1.01251	0.650732	0.624875	1.03942	0.321044	0.629755	1.08906	0.315559	0.661389	-1.08477	0.148517	0.445551	-1.12548	0.920707	0.979981	-1.00852	0.113333	0.53333	-1.13885	0.647232	0.893176	-1.03754	0.395559	0.60125
ssc-miR-99b_st	MIMAT0000132	mmu-miR-99b-5p	9.8088	0.189147	0.583792	0.0254533	0.0643553	0.647234	0.714189	0.434246	0.361021	0.304244	0.874739	1.15618	0.972503	0.981945	1.00484	0.22608	0.632141	1.18719	0.181565	0.277465	1.20911	0.237495	0.993609	-1.18216	0.644781	0.623288	1.07099	0.135966	0.526059	1.25309	0.0207509	0.439106	-1.40344	0.239087	0.504978	-1.18147	0.716262	0.978389	1.05552	0.896036	0.736096	1.01846	0.224553	0.716076	1.18788	0.0121698	0.308301
[truncated: 67 more columns]

## Sheet: pig All
		LEN v LSN			LEI v LSN			OEN v LSN			OEI v LSN			LSI v LSN			OSN v LSN			OSI v LSN			LSI v OEN			LEI v OEN			OSI v OEN			OEI v OEN			LEI v LSI			OSI v LSI			OEI v LSI			OEI v OSI			LEI v LEN
Probeset ID	Accession	p-value (Exendin * Lean * nor vs. Saline * Lean * nor)	FDR (Exendin * Lean * nor vs. Saline * Lean * nor)	Fold-Change (Exendin * Lean * nor vs. Saline * Lean * nor)	p-value (Exendin * Lean * Isch vs. Saline * Lean * nor)	FDR (Exendin * Lean * Isch vs. Saline * Lean * nor)	Fold-Change (Exendin * Lean * Isch vs. Saline * Lean * nor)	p-value (Exendin * Obese * nor vs. Saline * Lean * nor)	FDR (Exendin * Obese * nor vs. Saline * Lean * nor)	Fold-Change (Exendin * Obese * nor vs. Saline * Lean * nor)	p-value (Exendin * Obese * Isch vs. Saline * Lean * nor)	FDR (Exendin * Obese * Isch vs. Saline * Lean * nor)	Fold-Change (Exendin * Obese * Isch vs. Saline * Lean * nor)	p-value (Saline * Lean * Isch vs. Saline * Lean * nor)	FDR (Saline * Lean * Isch vs. Saline * Lean * nor)	Fold-Change (Saline * Lean * Isch vs. Saline * Lean * nor)	p-value (Saline * Obese * nor vs. Saline * Lean * nor)	FDR (Saline * Obese * nor vs. Saline * Lean * nor)	Fold-Change (Saline * Obese * nor vs. Saline * Lean * nor)	p-value (Saline * Obese * Isch vs. Saline * Lean * nor)	FDR (Saline * Obese * Isch vs. Saline * Lean * nor)	Fold-Change (Saline * Obese * Isch vs. Saline * Lean * nor)	p-value (Saline * Lean * Isch vs. Exendin * Obese * nor)	FDR (Saline * Lean * Isch vs. Exendin * Obese * nor)	Fold-Change (Saline * Lean * Isch vs. Exendin * Obese * nor)	p-value (Exendin * Lean * Isch vs. Exendin * Obese * nor)	FDR (Exendin * Lean * Isch vs. Exendin * Obese * nor)	Fold-Change (Exendin * Lean * Isch vs. Exendin * Obese * nor)	p-value (Saline * Obese * Isch vs. Exendin * Obese * nor)	FDR (Saline * Obese * Isch vs. Exendin * Obese * nor)	Fold-Change (Saline * Obese * Isch vs. Exendin * Obese * nor)	p-value (Exendin * Obese * Isch vs. Exendin * Obese * nor)	FDR (Exendin * Obese * Isch vs. Exendin * Obese * nor)	Fold-Change (Exendin * Obese * Isch vs. Exendin * Obese * nor)	p-value (Exendin * Lean * Isch vs. Saline * Lean * Isch)	FDR (Exendin * Lean * Isch vs. Saline * Lean * Isch)	Fold-Change (Exendin * Lean * Isch vs. Saline * Lean * Isch)	p-value (Saline * Obese * Isch vs. Saline * Lean * Isch)	FDR (Saline * Obese * Isch vs. Saline * Lean * Isch)	Fold-Change (Saline * Obese * Isch vs. Saline * Lean * Isch)	p-value (Exendin * Obese * Isch vs. Saline * Lean * Isch)	FDR (Exendin * Obese * Isch vs. Saline * Lean * Isch)	Fold-Change (Exendin * Obese * Isch vs. Saline * Lean * Isch)	p-value (Exendin * Obese * Isch vs. Saline * Obese * Isch)	FDR (Exendin * Obese * Isch vs. Saline * Obese * Isch)	Fold-Change (Exendin * Obese * Isch vs. Saline * Obese * Isch)	p-value (Exendin * Lean * Isch vs. Exendin * Lean * nor)	FDR (Exendin * Lean * Isch vs. Exendin * Lean * nor)	Fold-Change (Exendin * Lean * Isch vs. Exendin * Lean * nor)
ssc-let-7a_st	MIMAT0000062	0.989231	0.944005	1.00072	0.582681	0.981945	1.02988	0.517214	0.799079	-1.03535	0.0207716	0.140929	-1.13812	0.874064	0.993609	1.00851	0.907213	0.670108	1.00663	0.910731	0.774679	1.00638	0.421358	0.72425	1.04416	0.235397	0.504978	1.06629	0.470468	0.978389	1.04195	0.0843054	0.465133	-1.09926	0.695179	0.893176	1.02119	0.970216	0.715887	-1.00212	0.0143043	0.0841431	-1.14781	0.0220741	0.0709526	-1.14538	0.591906	0.993819	1.02914
ssc-let-7c_st	MIMAT0000064	0.319474	0.888679	1.06688	0.480883	0.981945	1.0467	0.391081	0.749571	-1.05723	0.324008	0.347746	-1.06623	0.468146	0.993609	-1.04811	0.849626	0.661684	-1.01306	0.804153	0.734128	1.01711	0.893198	0.857757	1.0087	0.123677	0.445551	1.10661	0.292866	0.950953	1.07532	0.895475	0.736096	-1.00851	0.157819	0.716076	1.09707	0.353219	0.581526	1.06605	0.790609	0.421925	-1.01728	0.24123	0.239753	-1.08447	0.767335	0.993819	-1.01928
ssc-let-7e_st	MIMAT0000066	0.584538	0.937124	1.04105	0.823837	0.981945	1.01648	0.142654	0.632141	-1.11579	0.968119	0.563045	1.00294	0.132872	0.993609	-1.11899	0.628289	0.615554	-1.03848	0.455543	0.657089	-1.06009	0.968885	0.857757	-1.00287	0.0938953	0.445551	1.13418	0.512145	0.978389	1.05254	0.132638	0.540707	1.11907	0.0869928	0.716076	1.13743	0.489027	0.625694	1.05556	0.123422	0.201822	1.12228	0.433431	0.306157	1.06321	0.745064	0.993819	-1.02417
ssc-let-7f_st	MIMAT0000067	0.607375	0.937124	-1.10203	0.686463	0.981945	1.07925	0.261102	0.632141	-1.239	0.0286595	0.140929	-1.53742	0.944987	0.993609	-1.0131	0.933529	0.670108	1.01683	0.984174	0.776351	-1.00398	0.290588	0.644344	1.22297	0.130912	0.445551	1.33718	0.297656	0.950953	1.23409	0.257859	0.635529	-1.24085	0.636691	0.893176	1.09339	0.96393	0.714719	1.00909	0.0334384	0.133754	-1.51753	0.0399707	0.0957654	-1.53132	0.361386	0.993819	1.18937
ssc-let-7g_st	MIMAT0000121	0.480626	0.924695	-1.11986	0.564374	0.981945	1.09678	0.209353	0.632141	-1.22549	0.0288187	0.140929	-1.43902	0.750256	0.993609	-1.05224	0.875624	0.66443	-1.02689	0.705188	0.725273	-1.06632	0.343911	0.699099	1.16465	0.0718879	0.445551	1.34409	0.414449	0.950953	1.14927	0.318972	0.658343	-1.17424	0.373169	0.768721	1.15407	0.93749	0.714719	-1.01338	0.0575265	0.165495	-1.36758	0.084706	0.152471	-1.34952	0.204514	0.993819	1.22823
ssc-let-7i_st	MIMAT0000122	0.496292	0.924695	1.29816	0.465107	0.981945	1.32359	0.483573	0.79005	-1.30836	0.0168284	0.140929	-2.60963	0.774788	0.993609	1.1156	0.930655	0.670108	-1.0359	0.829851	0.737865	1.09102	0.326224	0.674946	1.4596	0.157634	0.448857	1.73173	0.382891	0.950953	1.42745	0.0784007	0.464597	-1.99458	0.655092	0.893176	1.18644	0.956168	0.714719	-1.02252	0.0084232	0.0701934	-2.91129	0.0142056	0.0538486	-2.84717	0.959515	0.993819	1.01958
ssc-miR-1_st	MIMAT0000123	0.57705	0.937124	-1.17609	0.920278	0.981945	1.02946	0.184815	0.632141	-1.47762	0.41003	0.371763	-1.27169	0.942204	0.993609	-1.02125	0.774625	0.64198	-1.09216	0.293912	0.629755	-1.38533	0.20891	0.626353	1.44687	0.155173	0.448857	1.52115	0.834027	0.979981	1.06662	0.605666	0.69219	1.16194	0.863004	0.893176	1.05134	0.325613	0.581526	-1.35651	0.451768	0.392268	-1.24522	0.780979	0.394877	1.08937	0.511272	0.993819	1.21074
ssc-miR-100_st	MIMAT0000098	0.606488	0.937124	1.02621	0.847254	0.981945	1.0097	0.284096	0.661731	1.0557	0.623989	0.456389	-1.02492	0.952458	0.993609	1.00299	0.483746	0.588336	1.03808	0.0150123	0.332444	1.14568	0.310984	0.661389	-1.05255	0.377183	0.621242	-1.04555	0.131166	0.894707	1.08524	0.123226	0.540707	-1.082	0.894161	0.893176	1.00669	0.0171483	0.317509	1.14226	0.582718	0.405354	-1.02799	0.00478456	0.0316555	-1.17423	0.746482	0.993819	-1.01635
ssc-miR-101_st	MIMAT0000099	0.254331	0.866452	-1.15895	0.322018	0.981945	-1.13634	0.519568	0.799079	-1.08623	0.407556	0.371763	-1.11251	0.842731	0.993609	-1.02573	0.728032	0.637911	1.04839	0.567884	0.657089	-1.08086	0.654837	0.812965	1.05899	0.724885	0.789682	-1.04612	0.970831	0.979981	1.00498	0.8519	0.73386	-1.02419	0.426127	0.787032	-1.10783	0.700127	0.662915	-1.05375	0.527115	0.401629	-1.08461	0.831674	0.397337	-1.02929	0.877682	0.993819	1.0199
ssc-miR-103_st	MIMAT0000101	0.667227	0.937124	-1.03333	0.72959	0.981945	1.0267	0.740522	0.858953	1.02556	0.28925	0.327531	1.08487	0.316066	0.993609	-1.08003	0.655545	0.625356	-1.03674	0.200642	0.574688	-1.11048	0.185896	0.626353	-1.10763	0.98839	0.806576	1.00111	0.114919	0.894707	-1.13887	0.462299	0.666377	1.05783	0.18131	0.716076	1.10886	0.730867	0.662915	-1.0282	0.0443876	0.158527	1.17169	0.0269857	0.0714328	1.20473	0.43968	0.993819	1.06092
ssc-miR-105-1_st	MIMAT0000102	0.870657	0.937124	1.01416	0.855276	0.981945	1.01588	0.856588	0.871116	1.01573	0.571445	0.444503	-1.05023	0.4792	0.993609	-1.06329	0.0304765	0.383882	1.22915	0.820565	0.737865	-1.021	0.375906	0.704824	-1.08002	0.998665	0.806614	1.00014	0.691501	0.978389	-1.03707	0.456438	0.666377	-1.06676	0.375022	0.768721	1.08018	0.658269	0.662915	1.04142	0.886204	0.452145	1.01244	0.758202	0.394441	-1.02862	0.984377	0.993819	1.00169
ssc-miR-106a_st	MIMAT0000103	0.447235	0.924695	-1.06601	0.892771	0.981945	-1.01135	0.180161	0.632141	-1.12064	0.0398633	0.156598	-1.19523	0.463771	0.993609	1.06354	0.0663669	0.383882	-1.18262	0.208656	0.574688	-1.11977	0.0429019	0.482647	1.19184	0.225939	0.504978	1.10807	0.992992	0.979981	1.00078	0.443646	0.666377	-1.06656	0.386873	0.768721	-1.07561	0.0563996	0.317509	-1.19091	0.00708141	0.0701934	-1.27117	0.464595	0.311508	-1.06739	0.530756	0.993819	1.05405
ssc-miR-107_st	MIMAT0000104	0.661396	0.937124	1.02673	0.746196	0.981945	1.01967	0.0801147	0.632141	1.11406	0.0802658	0.196883	1.114	0.892041	0.993609	-1.0082	0.853344	0.661684	1.01186	0.506535	0.657089	-1.04344	0.0607999	0.483603	-1.12319	0.148065	0.445551	-1.09257	0.0238665	0.443071	-1.16246	0.999246	0.768651	-1.00006	0.646326	0.893176	1.02803	0.590969	0.662915	-1.03496	0.0609191	0.168407	1.12313	0.0239152	0.0714328	1.16239	0.908653	0.993819	-1.00692
ssc-miR-10a_st	MIMAT0000253	0.0390713	0.593583	-1.40963	0.62639	0.981945	1.0814	0.265475	0.634382	-1.19787	0.0902378	0.196883	-1.32119	0.948178	0.993609	1.01048	0.205268	0.51317	-1.24422	0.160336	0.531457	-1.275	0.239428	0.626353	1.21042	0.114282	0.445551	1.29538	0.714155	0.978389	-1.06439	0.542628	0.69219	-1.10295	0.672911	0.893176	1.07019	0.143708	0.428306	-1.28836	0.0793558	0.168407	-1.33504	0.834408	0.397337	-1.03623	0.0127304	0.441322	1.52438
ssc-miR-10b_st	MIMAT0000208	0.373403	0.924695	-1.40849	0.946061	0.981945	1.0262	0.0654715	0.632141	-2.06421	0.280451	0.327531	-1.51685	0.370824	0.993609	1.41114	0.427461	0.588336	-1.38186	0.563602	0.657089	1.26464	0.0084188	0.303077	2.91289	0.0569175	0.398422	2.11829	0.0235128	0.443071	2.61049	0.422715	0.666377	1.36085	0.407367	0.770059	-1.37511	0.78701	0.679691	-1.11584	0.0537558	0.165495	-2.14049	0.115644	0.189235	-1.91827	0.338906	0.993819	1.44539
ssc-miR-122_st	MIMAT0000246	0.575495	0.937124	-1.17819	0.520121	0.981945	1.20743	0.0646099	0.632141	-1.74307	0.00688798	0.10332	-2.31744	0.404737	0.993609	-1.27733	0.076134	0.383882	-1.75826	0.69006	0.721794	-1.13167	0.291663	0.644344	1.36462	0.0154043	0.323489	2.10464	0.169964	0.91338	1.54027	0.333286	0.658343	-1.32952	0.145119	0.716076	1.54228	0.696272	0.662915	1.12871	0.0484973	0.165495	-1.81429	0.0265285	0.0714328	-2.04781	0.233101	0.993819	1.42258
ssc-miR-124a_st	MIMAT0000134	0.831553	0.937124	-1.03235	0.831833	0.981945	-1.03229	0.801091	0.858953	-1.03843	0.754345	0.508547	-1.04797	0.419461	0.993609	-1.12914	0.49761	0.588336	-1.1141	0.55641	0.657089	1.09813	0.576653	0.753171	-1.08735	0.968382	0.806576	1.00595	0.410605	0.950953	1.14034	0.951277	0.753487	-1.00918	0.550117	0.887505	1.09382	0.181894	0.474906	1.23995	0.618762	0.405354	1.07746	0.379189	0.294348	-1.15081	0.999713	0.999713	1.00005
ssc-miR-125a_st	MIMAT0000135	0.0337622	0.582516	1.3291	0.187075	0.981945	1.18845	0.0395799	0.632141	1.31676	0.269789	0.327531	1.15463	0.11736	0.993609	1.22898	0.14877	0.490266	1.22264	0.032864	0.395727	1.35449	0.593514	0.76858	-1.07143	0.429013	0.641616	-1.10796	0.83642	0.979981	1.02865	0.312387	0.658343	-1.14042	0.794946	0.893176	-1.0341	0.478958	0.625694	1.10213	0.62909	0.405354	-1.06439	0.248435	0.239753	-1.1731	0.388693	0.993819	-1.11835
ssc-miR-125b_st	MIMAT0000136	0.670446	0.937124	1.01624	0.757098	0.981945	-1.01177	0.224602	0.632141	1.04756	0.364045	0.361037	-1.03514	0.160528	0.993609	1.0554	0.321131	0.549486	-1.04091	0.323021	0.629755	1.04075	0.843643	0.857757	1.00748	0.131127	0.445551	-1.05989	0.870655	0.979981	-1.00655	0.0387504	0.387504	-1.08438	0.0901586	0.716076	-1.06782	0.727448	0.662915	-1.01408	0.0249415	0.114318	-1.09249	0.070729	0.138383	-1.07732	0.463924	0.993819	-1.02819
ssc-miR-126_st	MIMAT0000138	0.50214	0.926847	1.05327	0.52757	0.981945	1.05004	0.873237	0.871116	-1.01237	0.0213888	0.140929	-1.20383	0.516493	0.993609	1.05144	0.146258	0.490266	-1.12848	0.156372	0.531457	-1.12504	0.420123	0.72425	1.06445	0.429957	0.641616	1.06303	0.202781	0.950953	-1.11129	0.0307496	0.373736	-1.18912	0.986262	0.893176	-1.00133	0.0468759	0.317509	-1.18291	0.00435189	0.0701934	-1.26575	0.410121	0.306157	-1.07004	0.968226	0.993819	-1.00307
ssc-miR-127_st	MIMAT0000139	0.900825	0.944005	1.06082	0.884818	0.981945	-1.07104	0.12082	0.632141	-2.11713	0.0167882	0.140929	-3.28622	0.163329	0.993609	-1.95678	0.0124332	0.311319	-3.76282	0.119761	0.523723	-2.22093	0.867982	0.857757	1.08194	0.157275	0.448857	1.97669	0.924106	0.979981	-1.04903	0.356767	0.663753	-1.55221	0.209344	0.716076	1.82699	0.801127	0.683951	-1.13499	0.278535	0.307457	-1.6794	0.437822	0.306157	-1.47966	0.787652	0.993819	-1.13618
ssc-miR-1277_st	MIMAT0005933	0.482198	0.924695	-1.06418	0.676631	0.981945	1.0375	0.284113	0.661731	1.10003	0.448335	0.380256	-1.06946	0.889475	0.993609	1.01233	0.586004	0.601651	1.05237	0.0278546	0.395727	1.239	0.349459	0.699099	-1.08663	0.508316	0.689392	-1.06026	0.20923	0.950953	1.12634	0.0728748	0.464597	-1.17643	0.780625	0.893176	1.02487	0.0372874	0.317509	1.22392	0.370896	0.34676	-1.08264	0.00492419	0.0316555	-1.32506	0.266274	0.993819	1.10409
ssc-miR-128_st	MIMAT0000140	0.528964	0.937124	1.06816	0.938608	0.981945	-1.00807	0.914958	0.871116	1.01121	0.173555	0.275696	-1.15523	0.520055	0.993609	-1.0697	0.734698	0.637911	-1.03827	0.66502	0.705252	1.04918	0.454006	0.72425	-1.08169	0.854195	0.806576	-1.01937	0.739377	0.978389	1.03755	0.143628	0.540707	-1.16818	0.570749	0.893176	1.06114	0.301652	0.580394	1.12231	0.463206	0.392268	-1.07996	0.0900628	0.155878	-1.21205	0.480346	0.993819	-1.07678
ssc-miR-1285_st	MIMAT0005876	0.572527	0.937124	-1.09588	0.521135	0.981945	-1.1098	0.314019	0.691969	-1.17859	0.934667	0.555385	-1.01335	0.549887	0.993609	-1.10191	0.572902	0.601651	1.10188	0.258714	0.629755	1.21646	0.678022	0.813627	1.06959	0.710458	0.789682	1.06198	0.042689	0.622681	1.4337	0.354049	0.663753	1.16306	0.96483	0.893176	-1.00716	0.0954687	0.386066	1.34042	0.605439	0.405354	1.08739	0.228548	0.239753	-1.2327	0.937848	0.993819	-1.0127
ssc-miR-129a_st	MIMAT0000544	0.188008	0.774772	-1.2285	0.0114809	0.981945	-1.50885	0.0591696	0.632141	-1.34935	0.0332979	0.142705	-1.4061	0.0808489	0.993609	-1.31783	0.0225359	0.383882	-1.47654	0.192941	0.574688	-1.24084	0.878086	0.857757	1.02391	0.470203	0.669038	-1.11821	0.608677	0.978389	1.08744	0.789243	0.723232	-1.04206	0.3826	0.768721	-1.14495	0.712855	0.662915	1.06204	0.6743	0.415334	-1.06698	0.446352	0.306157	-1.13318	0.188502	0.993819	-1.22821
ssc-miR-1306-3p_st	MIMAT0009411	0.162581	0.768505	1.3313	0.660229	0.981945	1.0928	0.654653	0.858953	1.09451	0.311027	0.342415	-1.22871	0.573274	0.993609	1.12056	0.433337	0.588336	-1.18337	0.305632	0.629755	1.24727	0.907121	0.857757	1.0238	0.993817	0.806576	-1.00156	0.542374	0.978389	1.13957	0.148694	0.540707	-1.34484	0.900985	0.893176	-1.0254	0.617023	0.662915	1.11308	0.120091	0.201473	-1.37684	0.0530794	0.106159	-1.53253	0.331224	0.993819	-1.21824
ssc-miR-1306-5p_st	MIMAT0022726	0.819646	0.937124	1.03354	0.970874	0.981945	-1.0053	0.677681	0.858953	1.06205	0.894332	0.542019	1.0194	0.293907	0.993609	1.1656	0.985638	0.694456	1.00277	0.580526	0.664334	-1.08871	0.521545	0.740794	1.0975	0.651292	0.770542	-1.06768	0.347511	0.950953	-1.15627	0.777023	0.723232	-1.04184	0.277894	0.716076	-1.17177	0.127865	0.428306	-1.26901	0.357588	0.34676	-1.14342	0.498617	0.318117	1.10984	0.791428	0.993819	-1.03902
ssc-miR-1307_st	MIMAT0005951	0.770309	0.937124	1.05817	0.130364	0.981945	-1.34782	0.980875	0.883711	-1.00465	0.191097	0.283107	-1.29265	0.181884	0.993609	-1.2999	0.0460479	0.383882	-1.52752	0.39585	0.649754	-1.19166	0.189505	0.626353	-1.29388	0.136217	0.445551	-1.34158	0.40832	0.950953	-1.18614	0.199014	0.602084	-1.28667	0.851659	0.893176	-1.03686	0.67235	0.662915	1.09083	0.976956	0.474251	1.00561	0.692247	0.384582	-1.08475	0.0741979	0.993819	-1.42622
ssc-miR-130a_st	MIMAT0000141	0.717832	0.937124	1.0671	0.906117	0.981945	1.0214	0.716015	0.858953	1.06757	0.0709753	0.191025	-1.39557	0.98705	0.994275	-1.00292	0.223783	0.531943	1.26437	0.769041	0.726153	1.05755	0.703973	0.828203	-1.07068	0.80559	0.800823	-1.0452	0.960502	0.979981	-1.00947	0.0327019	0.373736	-1.48986	0.893274	0.893176	1.02438	0.7574	0.672564	1.06063	0.073345	0.168407	-1.39151	0.048033	0.102928	-1.47588	0.807476	0.993819	-1.04474
ssc-miR-130b_st	MIMAT0000387	0.602332	0.937124	-1.0711	0.885079	0.981945	1.01919	0.826275	0.858953	-1.0293	0.115485	0.227187	-1.23543	0.145235	0.993609	-1.21537	0.010244	0.311319	-1.4609	0.0963199	0.522869	-1.26808	0.212418	0.626353	-1.18078	0.716065	0.789682	1.04905	0.141993	0.894707	-1.23198	0.171895	0.572983	-1.20026	0.111189	0.716076	1.2387	0.76106	0.672564	-1.04337	0.900961	0.457304	-1.0165	0.851718	0.399243	1.02643	0.506485	0.993819	1.09166
ssc-miR-133a-3p_st	MIMAT0000145	0.0217249	0.582516	1.16294	0.391729	0.981945	-1.05567	0.0844638	0.632141	1.11767	0.436844	0.380256	1.05036	0.293185	0.993609	1.06898	0.479491	0.588336	1.04849	0.344404	0.629755	1.06558	0.480411	0.726673	-1.04555	0.0126154	0.323489	-1.1799	0.476029	0.978389	-1.04888	0.327018	0.658343	-1.06409	0.0619632	0.716076	-1.12849	0.961972	0.714719	-1.00318	0.779981	0.421925	-1.01773	0.829162	0.397337	-1.0145	0.00256327	0.189756	-1.22768
ssc-miR-133a-5p_st	MIMAT0026478	0.305605	0.874739	-1.12543	0.329089	0.981945	-1.11905	0.0104822	0.632141	-1.36284	0.000597446	0.0179234	-1.54487	0.0445182	0.993609	-1.2684	0.040542	0.383882	-1.29359	0.00621857	0.332444	-1.4246	0.531227	0.741247	1.07446	0.0923833	0.445551	1.21786	0.715059	0.978389	-1.04531	0.277596	0.653168	-1.13357	0.277944	0.716076	1.13346	0.341875	0.581526	-1.12315	0.0922377	0.168407	-1.21797	0.505452	0.318117	-1.08443	0.960296	0.993819	1.00571
ssc-miR-133b_st	MIMAT0000769	0.0353934	0.582516	1.17026	0.641219	0.981945	-1.03416	0.0894826	0.632141	1.13341	0.363683	0.361037	1.06803	0.330204	0.993609	1.07318	0.728617	0.637911	1.02686	0.485229	0.657089	1.05494	0.450159	0.72425	-1.05612	0.0336981	0.357963	-1.17213	0.350759	0.950953	-1.07438	0.411691	0.666377	-1.06121	0.154541	0.716076	-1.10984	0.82235	0.686798	-1.01729	0.94673	0.465993	-1.00482	0.87163	0.40073	1.01241	0.0120105	0.441322	-1.21023
ssc-miR-1343_st	MIMAT0019776	0.460904	0.924695	1.32852	0.840225	0.981945	1.08041	0.840998	0.869347	-1.08	0.0502185	0.160003	-2.17251	0.16551	0.993609	-1.71696	0.807942	0.647246	-1.10398	0.859328	0.746742	1.07477	0.232326	0.626353	-1.58979	0.687823	0.789682	1.16684	0.714313	0.978389	1.16075	0.0760086	0.464597	-2.01159	0.114673	0.716076	1.85502	0.139263	0.428306	1.84534	0.540725	0.401629	-1.26532	0.0440277	0.0966462	-2.33494	0.590738	0.993819	-1.22965
ssc-miR-139-5p_st	MIMAT0000250	0.0106438	0.582516	1.26984	0.416076	0.981945	1.07499	0.0241597	0.632141	1.23151	0.064447	0.184134	1.18334	0.88998	0.993609	1.01231	0.331534	0.549486	1.09615	0.0485947	0.438702	1.21072	0.0330031	0.456967	-1.21653	0.131627	0.445551	-1.14559	0.855991	0.979981	-1.01717	0.652433	0.711715	-1.0407	0.498512	0.825601	1.06192	0.0638527	0.334676	1.196	0.0851722	0.168407	1.16896	0.807461	0.397337	-1.02313	0.0671403	0.993819	-1.18126
ssc-miR-140_st	MIMAT0000151	0.491623	0.924695	1.26421	0.315458	0.981945	-1.41024	0.175366	0.632141	-1.59578	0.0243075	0.140929	-2.22263	0.550617	0.993609	1.22539	0.368003	0.574225	-1.38602	0.492665	0.657089	-1.28154	0.0555845	0.483603	1.95546	0.716145	0.789682	1.13156	0.543828	0.978389	1.2452	0.332992	0.658343	-1.39282	0.114719	0.716076	-1.7281	0.21607	0.503651	-1.57039	0.00573041	0.0701934	-2.72359	0.133621	0.205413	-1.73434	0.0962553	0.993819	-1.78285
ssc-miR-140-star_st	MIMAT0000152	0.0641892	0.720774	-1.37909	0.0992368	0.981945	-1.32917	0.963265	0.881795	1.0078	0.279308	0.327531	1.20236	0.956366	0.993609	1.00927	0.996432	0.694628	-1.0008	0.040271	0.436269	-1.46277	0.993092	0.859406	1.00146	0.0907439	0.445551	-1.33954	0.0366242	0.575312	-1.47418	0.299685	0.658343	1.19306	0.0892178	0.716076	-1.34149	0.0359726	0.317509	-1.47633	0.30363	0.32301	1.19132	0.00338674	0.0304807	1.75878	0.827036	0.993819	1.03756
ssc-miR-142-5p_st	MIMAT0000154	0.508811	0.930465	-1.05867	0.380787	0.981945	1.07879	0.245481	0.632141	1.10627	0.201028	0.290643	1.11791	0.814942	0.993609	-1.02033	0.325775	0.549486	1.09455	0.976669	0.774679	1.00267	0.165712	0.626353	-1.12876	0.769997	0.791632	-1.02547	0.285542	0.950953	-1.10332	0.90312	0.736096	1.01052	0.26923	0.716076	1.10073	0.802676	0.683951	1.02306	0.133202	0.201822	1.14064	0.238353	0.239753	1.11493	0.129667	0.993819	1.14208
ssc-miR-143-3p_st	MIMAT0000247	0.980565	0.944005	-1.00268	0.655211	0.981945	-1.0503	0.159571	0.632141	-1.16991	0.985322	0.568455	-1.00202	0.689311	0.993609	-1.0449	0.523507	0.588336	1.07734	0.00250034	0.307411	-1.46346	0.307271	0.661389	1.11964	0.329472	0.567275	1.11388	0.0618304	0.770396	-1.25092	0.164831	0.572983	1.16755	0.962548	0.893176	-1.00517	0.00659672	0.307934	-1.40058	0.702859	0.421074	1.04279	0.00261679	0.0294764	1.46051	0.672814	0.993819	-1.04749
ssc-miR-143-5p_st	MIMAT0004599	0.463767	0.924695	1.32822	0.509467	0.981945	-1.29091	0.743702	0.858953	-1.13452	0.0533343	0.160003	-2.15826	0.810541	0.993609	-1.09691	0.52203	0.588336	-1.30056	0.0340934	0.395727	-2.46134	0.930354	0.857757	1.03428	0.737976	0.789682	-1.13785	0.0658354	0.770396	-2.16951	0.103052	0.529361	-1.90236	0.673301	0.893176	-1.17686	0.0555014	0.317509	-2.24389	0.0869557	0.168407	-1.96758	0.748236	0.39345	1.14043	0.168884	0.993819	-1.71461
ssc-miR-145_st	MIMAT0000157	0.602883	0.937124	1.05841	0.79651	0.981945	-1.02849	0.712519	0.858953	1.04098	0.273007	0.327531	1.12813	0.837207	0.993609	-1.02263	0.686447	0.629967	1.04779	0.960444	0.774679	1.00574	0.566748	0.753171	-1.06454	0.532074	0.703191	-1.07064	0.765718	0.979981	-1.03503	0.462267	0.666377	1.08372	0.958154	0.893176	-1.00573	0.807804	0.683951	1.0285	0.195532	0.257445	1.15366	0.323988	0.26999	1.12169	0.438042	0.993819	-1.08857
ssc-miR-146a_st	MIMAT0016989	0.428247	0.924695	1.08107	0.789904	0.981945	1.02644	0.0222916	0.632141	1.26356	0.443192	0.380256	1.07835	0.439947	0.993609	-1.07893	0.626861	0.615554	-1.05187	0.762229	0.726153	-1.03193	0.00330018	0.285851	-1.3633	0.0405025	0.357963	-1.23101	0.0151096	0.443071	-1.30391	0.11294	0.53333	-1.17175	0.301421	0.723189	1.10746	0.668399	0.662915	1.04555	0.129302	0.201822	1.16347	0.307579	0.263639	1.11278	0.597104	0.993819	-1.05323
ssc-miR-146b_st	MIMAT0002809	0.173684	0.768505	1.31093	0.515569	0.981945	1.13636	0.975048	0.883711	1.00615	0.582957	0.445572	-1.11387	0.673595	0.993609	1.08615	0.440429	0.588336	1.17481	0.969534	0.774679	-1.00797	0.696484	0.824784	1.07952	0.535764	0.703191	1.12942	0.94604	0.979981	-1.01416	0.561849	0.69219	-1.12071	0.817652	0.893176	1.04622	0.663402	0.662915	-1.09481	0.334701	0.338082	-1.20983	0.631326	0.361698	-1.10506	0.467688	0.993819	-1.15362
ssc-miR-148a_st	MIMAT0000243	0.562447	0.937124	-1.25439	0.962062	0.981945	1.01873	0.216423	0.632141	-1.63005	0.0525662	0.160003	-2.18373	0.752087	0.993609	1.13129	0.0686269	0.383882	-2.17102	0.27049	0.629755	-1.58529	0.12425	0.626353	1.84406	0.199916	0.501282	1.66058	0.946367	0.979981	1.02823	0.455716	0.666377	-1.33967	0.788372	0.893176	-1.11049	0.16499	0.455971	-1.79343	0.0262931	0.114318	-2.47044	0.441313	0.306157	-1.3775	0.531091	0.993819	1.27788
ssc-miR-148b_st	MIMAT0000580	0.391989	0.924695	1.49998	0.646162	0.981945	1.24172	0.389247	0.749571	-1.50356	0.200513	0.290643	-1.84229	0.243725	0.993609	-1.74211	0.43936	0.588336	-1.47409	0.348604	0.629755	-1.60235	0.754601	0.840485	-1.15866	0.191137	0.493027	1.867	0.8986	0.979981	-1.0657	0.666512	0.711715	-1.22528	0.108785	0.716076	2.16321	0.867009	0.689446	1.08722	0.905461	0.457304	-1.05751	0.780014	0.394877	-1.14975	0.68851	0.993819	-1.20799
ssc-miR-149_st	MIMAT0000159	0.032311	0.582516	1.34496	0.999331	0.999331	-1.00011	0.129614	0.632141	1.22845	0.466135	0.391163	1.10237	0.397587	0.993609	-1.11997	0.916836	0.670108	1.01486	0.202876	0.574688	1.19998	0.0219553	0.439106	-1.37583	0.129414	0.445551	-1.22859	0.868122	0.979981	-1.02373	0.418536	0.666377	-1.11438	0.398047	0.770059	1.11985	0.0432174	0.317509	1.34394	0.120884	0.201473	1.23462	0.549152	0.333944	-1.08855	0.0322508	0.745352	-1.34511
ssc-miR-151-3p_st	MIMAT0000757	0.978093	0.944005	1.00168	0.946057	0.981945	-1.00415	0.611399	0.846316	1.03167	0.00437966	0.0750799	-1.20583	0.181929	0.993609	-1.08653	0.383393	0.579083	-1.05864	0.442398	0.657089	1.05142	0.0698538	0.483603	-1.12094	0.56513	0.721361	-1.03596	0.770501	0.979981	1.01914	0.00114479	0.0710496	-1.24402	0.204077	0.716076	1.08203	0.0474746	0.317509	1.1424	0.0965556	0.169396	-1.1098	0.000902049	0.0270615	-1.26783	0.924223	0.993819	-1.00584
ssc-miR-151-5p_st	MIMAT0004536	0.196682	0.776895	-1.08655	0.862727	0.981945	1.01102	0.120841	0.632141	-1.10558	0.0254479	0.140929	-1.15934	0.0765719	0.993609	-1.12222	0.29399	0.549486	-1.07382	0.118328	0.523723	-1.11318	0.813847	0.857757	-1.01505	0.086726	0.445551	1.11777	0.918924	0.979981	-1.00687	0.456062	0.666377	-1.04862	0.0536636	0.716076	1.13459	0.904252	0.701257	1.00812	0.608549	0.405354	-1.03307	0.54692	0.333944	-1.04146	0.14541	0.993819	1.09853
ssc-miR-152_st	MIMAT0000162	0.101515	0.724422	-1.33773	0.366463	0.981945	-1.17109	0.191838	0.632141	-1.25857	0.861052	0.532609	-1.03087	0.451654	0.993609	-1.14036	0.18916	0.509502	-1.2782	0.0291153	0.395727	-1.51992	0.571151	0.753171	1.10366	0.678733	0.789682	1.0747	0.309944	0.950953	-1.20765	0.255717	0.635529	1.22088	0.878342	0.893176	-1.02695	0.126273	0.428306	-1.33284	0.56222	0.405354	1.10621	0.0419138	0.0957654	1.4744	0.445926	0.993819	1.14229
ssc-miR-15a_st	MIMAT0000068	0.931822	0.944005	-1.03428	0.731551	0.981945	-1.14484	0.134769	0.632141	-1.82286	0.0217749	0.140929	-2.5739	0.810159	0.993609	-1.09929	0.920426	0.670108	-1.04262	0.324383	0.629755	-1.51457	0.20531	0.626353	1.65821	0.243091	0.504978	1.59224	0.657964	0.978389	1.20355	0.384132	0.666377	-1.41201	0.917917	0.893176	-1.04143	0.445303	0.615328	-1.37777	0.0374068	0.143872	-2.34141	0.210392	0.239753	-1.69943	0.796637	0.993819	-1.1069
ssc-miR-15b_st	MIMAT0000124	0.175311	0.768505	1.25965	0.0689567	0.981945	1.36845	0.468042	0.789586	-1.13	0.0779912	0.196883	-1.35453	0.241489	0.993609	1.21981	0.912554	0.670108	1.01972	0.585156	0.66495	1.10222	0.0631222	0.483603	1.37839	0.0136187	0.323489	1.54636	0.222843	0.950953	1.24551	0.284445	0.658343	-1.19869	0.494576	0.825601	1.12186	0.569757	0.662915	-1.10668	0.00512802	0.0701934	-1.65227	0.0303972	0.075993	-1.49299	0.621963	0.993819	1.08638
ssc-miR-16_st	MIMAT0000069	0.965721	0.944005	1.0039	0.628032	0.981945	1.04489	0.0852135	0.632141	-1.17314	0.0404545	0.156598	-1.21183	0.0746421	0.993609	1.18021	0.822425	0.648107	-1.02178	0.226988	0.604682	-1.12453	0.0010525	0.18945	1.38454	0.0305902	0.357963	1.2258	0.659708	0.978389	1.04323	0.720067	0.711715	-1.03299	0.184776	0.716076	-1.1295	0.00574288	0.307934	-1.32718	0.00039393	0.039393	-1.43022	0.438148	0.306157	-1.07764	0.658666	0.993819	1.04084
ssc-miR-17-3p_st	MIMAT0000071	0.85933	0.937124	1.07897	0.753205	0.981945	-1.14444	0.253634	0.632141	-1.64027	0.354561	0.361037	-1.49153	0.441266	0.993609	1.39348	0.297492	0.549486	-1.61306	0.0453449	0.438702	-2.56464	0.0612867	0.483603	2.2857	0.403922	0.635134	1.43326	0.32956	0.950953	-1.56354	0.824596	0.728058	1.09973	0.281061	0.716076	-1.59475	0.00834294	0.307934	-3.57378	0.0955998	0.169396	-2.07842	0.238802	0.239753	1.71947	0.623461	0.993819	-1.23481
ssc-miR-17-5p_st	MIMAT0000070	0.983452	0.944005	1.00207	0.914992	0.981945	-1.01068	0.259004	0.632141	-1.12027	0.708143	0.494054	-1.03801	0.304025	0.993609	1.10874	0.198473	0.509502	-1.1476	0.285501	0.629755	-1.12058	0.0359365	0.462041	1.24208	0.305323	0.551551	1.10843	0.997872	0.979981	-1.00028	0.445789	0.666377	1.07925	0.25785	0.716076	-1.12058	0.0468188	0.317509	-1.24243	0.164854	0.235675	-1.15088	0.470374	0.311508	1.07955	0.898562	0.993819	-1.01277
ssc-miR-181a_st	MIMAT0000210	0.0233894	0.582516	1.37307	0.491921	0.981945	1.09674	0.527677	0.799079	1.0885	0.514189	0.416691	-1.09157	0.353853	0.993609	-1.13313	0.792513	0.64198	-1.03807	0.742926	0.726153	1.0477	0.124429	0.626353	-1.23341	0.95509	0.806576	1.00757	0.787926	0.979981	-1.03895	0.203788	0.602084	-1.18817	0.111972	0.716076	1.24274	0.232381	0.506683	1.18718	0.780206	0.421925	1.03808	0.347992	0.279636	-1.14363	0.10079	0.993819	-1.25195
ssc-miR-181b_st	MIMAT0000257	0.157127	0.768505	1.21398	0.834179	0.981945	1.02862	0.803569	0.858953	1.0341	0.0895569	0.196883	-1.2642	0.219587	0.993609	-1.18239	0.196327	0.509502	-1.20598	0.50682	0.657089	1.0999	0.142839	0.626353	-1.22271	0.968541	0.806576	-1.00533	0.66649	0.978389	1.06363	0.0540102	0.454822	-1.30731	0.153322	0.716076	1.21623	0.0735988	0.349594	1.30052	0.620263	0.405354	-1.06919	0.0269644	0.0714328	-1.3905	0.224611	0.993819	-1.1802
ssc-miR-181c_st	MIMAT0000258	0.0722414	0.720774	1.94417	0.120329	0.981945	-1.76915	0.923194	0.871116	-1.0353	0.164403	0.274006	-1.66288	0.405924	0.993609	-1.35091	0.242407	0.532561	-1.57038	0.336204	0.629755	-1.44758	0.461634	0.72425	-1.30485	0.143641	0.445551	-1.70883	0.382824	0.950953	-1.39822	0.194182	0.602084	-1.60618	0.455593	0.818399	-1.3096	0.856326	0.688685	-1.07156	0.564712	0.405354	-1.23093	0.71665	0.386218	-1.14873	0.0016327	0.189756	-3.43952
ssc-miR-181d-3p_st	MIMAT0017264	0.00658762	0.582516	-1.39878	0.00262837	0.546702	-1.45801	0.00243633	0.448285	-1.4629	0.153978	0.263962	-1.18306	0.041228	0.993609	-1.27782	0.281825	0.549486	-1.14294	0.0113319	0.332444	-1.3895	0.248505	0.626353	1.14484	0.976946	0.806576	1.00335	0.675858	0.978389	1.05282	0.0746019	0.464597	1.23654	0.260155	0.716076	-1.14101	0.497167	0.625694	-1.0874	0.507768	0.401629	1.08009	0.197045	0.236454	1.1745	0.720741	0.993819	-1.04235
ssc-miR-181d-5p_st	MIMAT0002821	0.408515	0.924695	1.1212	0.570613	0.981945	1.0814	0.303762	0.690028	1.15349	0.0184376	0.140929	-1.40515	0.517701	0.993609	-1.09345	0.625724	0.615554	-1.07394	0.382357	0.640546	1.13693	0.0992959	0.558539	-1.26128	0.639717	0.766713	-1.06666	0.921075	0.979981	-1.01457	0.00133218	0.0710496	-1.62083	0.228968	0.716076	1.18246	0.143098	0.428306	1.24317	0.0760144	0.168407	-1.28506	0.00294764	0.0294764	-1.59755	0.79297	0.993819	-1.0368
ssc-miR-183_st	MIMAT0000212	0.300383	0.874739	1.10592	0.568619	0.981945	-1.05662	0.789716	0.858953	1.02604	0.58226	0.445572	1.05457	0.099061	0.993609	1.1766	0.710674	0.637911	1.03868	0.476225	0.657089	-1.07585	0.162162	0.626353	1.14674	0.40452	0.635134	-1.08413	0.337297	0.950953	-1.10386	0.776056	0.723232	1.0278	0.0299752	0.716076	-1.24322	0.0269472	0.317509	-1.26584	0.26082	0.296386	-1.11572	0.2225	0.239753	1.13455	0.113505	0.993819	-1.16854
ssc-miR-1839-5p_st	MIMAT0009456	0.982221	0.944005	-1.0045	0.528401	0.981945	-1.13605	0.520987	0.799079	-1.13869	0.408184	0.371763	-1.18264	0.468472	0.993609	-1.15817	0.392389	0.580576	-1.2021	0.253525	0.629755	-1.28009	0.932954	0.857757	-1.01711	0.990831	0.806576	1.00232	0.585125	0.978389	-1.12418	0.851052	0.73386	-1.0386	0.923824	0.893176	1.01947	0.640422	0.662915	-1.10527	0.917416	0.461013	-1.02113	0.71155	0.386218	1.0824	0.542936	0.993819	-1.13096
ssc-miR-184_st	MIMAT0000454	0.642038	0.937124	-1.18663	0.801444	0.981945	-1.09686	0.579861	0.833939	-1.22622	0.0854475	0.196883	-1.91188	0.848133	0.993609	1.07292	0.359088	0.572173	-1.43329	0.278216	0.629755	1.53238	0.457419	0.72425	1.31564	0.761756	0.791632	1.11794	0.11313	0.894707	1.87904	0.23238	0.630184	-1.55917	0.658171	0.893176	-1.17685	0.363759	0.581526	1.42823	0.0579234	0.165495	-2.0513	0.00926881	0.0439049	-2.92974	0.830543	0.993819	1.08184
ssc-miR-185_st	MIMAT0000214	0.690164	0.937124	1.04574	0.257083	0.981945	1.13697	0.957178	0.881795	-1.00603	0.405789	0.371763	-1.09822	0.14481	0.993609	-1.18099	0.368296	0.574225	-1.11366	0.296752	0.629755	-1.13332	0.159389	0.626353	-1.1739	0.235933	0.504978	1.14383	0.320169	0.950953	-1.12652	0.436271	0.666377	-1.09163	0.012648	0.671601	1.34275	0.729087	0.662915	1.04206	0.518146	0.401629	1.07536	0.791351	0.397337	1.03196	0.457437	0.993819	1.08724
ssc-miR-186_st	MIMAT0000215	0.380927	0.924695	1.12286	0.0686159	0.981945	1.27905	0.791869	0.858953	1.0353	0.574149	0.444503	1.07684	0.285687	0.993609	1.15216	0.33727	0.549486	1.14428	0.543283	0.657089	-1.08869	0.418254	0.72425	1.11288	0.115141	0.445551	1.23544	0.393427	0.950953	-1.12713	0.764796	0.723232	1.04012	0.428963	0.787032	1.11013	0.111512	0.423745	-1.25435	0.607675	0.405354	-1.06994	0.259012	0.239753	1.17235	0.325521	0.993819	1.13911
ssc-miR-18a_st	MIMAT0000072	0.660913	0.937124	-1.11621	0.71362	0.981945	1.09629	0.23515	0.632141	-1.3507	0.741851	0.506957	-1.086	0.825083	0.993609	1.05688	0.904063	0.670108	1.03251	0.0852964	0.522869	-1.59734	0.161778	0.626353	1.42754	0.124132	0.445551	1.48076	0.528807	0.978389	-1.1826	0.386354	0.666377	1.24375	0.883696	0.893176	1.03729	0.0558103	0.317509	-1.6882	0.582728	0.405354	-1.14777	0.153047	0.211888	1.47085	0.422323	0.993819	1.22369
ssc-miR-18b_st	MIMAT0001412	0.98435	0.944005	1.00842	0.348889	0.981945	1.49658	0.513819	0.799079	-1.32305	0.250194	0.327531	-1.64344	0.513194	0.993609	1.3236	0.677648	0.629865	-1.2076	0.772663	0.726153	-1.13997	0.196004	0.626353	1.7512	0.117353	0.445551	1.98005	0.742617	0.978389	1.1606	0.612516	0.693823	-1.24216	0.773889	0.893176	1.13068	0.36728	0.581526	-1.50887	0.0765444	0.168407	-2.17526	0.42206	0.306157	-1.44165	0.358853	0.993819	1.48409
ssc-miR-191_st	MIMAT0000221	0.572967	0.937124	-1.04067	0.796693	0.981945	1.01835	0.472035	0.789586	-1.05227	0.954783	0.560143	1.00401	0.341875	0.993609	-1.06989	0.0706072	0.383882	-1.14922	0.641869	0.704755	-1.03547	0.813951	0.857757	-1.01675	0.330911	0.567275	1.07158	0.829773	0.979981	1.01622	0.438293	0.666377	1.05649	0.229843	0.716076	1.08952	0.662582	0.662915	1.03324	0.314506	0.32761	1.07418	0.604304	0.359643	1.03962	0.413172	0.993819	1.05977
ssc-miR-192_st	MIMAT0000222	0.457966	0.924695	-1.34964	0.338521	0.981945	-1.47381	0.224268	0.632141	-1.64021	0.000560792	0.0179234	-4.66036	0.263798	0.993609	-1.57478	0.399318	0.583269	-1.43568	0.122471	0.523723	-1.95858	0.919378	0.857757	1.04154	0.790337	0.79507	1.1129	0.677896	0.978389	-1.19411	0.0137048	0.224695	-2.84133	0.869127	0.893176	1.06851	0.609873	0.662915	-1.24371	0.0107322	0.0766584	-2.95936	0.0492399	0.10306	-2.37946	0.826814	0.993819	-1.092
ssc-miR-193a-3p_st	MIMAT0000223	0.719689	0.937124	1.18415	0.744241	0.981945	-1.16606	0.355212	0.728236	-1.54981	0.567865	0.444503	-1.30928	0.575557	0.993609	-1.30228	0.527474	0.588336	-1.37215	0.65852	0.705252	-1.24721	0.711796	0.831969	1.19008	0.546607	0.71186	1.3291	0.663851	0.978389	1.24262	0.720284	0.711715	1.18371	0.81442	0.893176	1.11682	0.93101	0.714715	1.04415	0.990901	0.478696	-1.00538	0.92247	0.411001	-1.04977	0.494544	0.993819	-1.38079
ssc-miR-193a-5p_st	MIMAT0004614	0.980502	0.944005	-1.00516	0.655705	0.981945	-1.09866	0.729113	0.858953	-1.07577	0.814802	0.511816	-1.05061	0.756431	0.993609	-1.06758	0.186933	0.509502	-1.3489	0.556709	0.657089	1.14079	0.971096	0.857757	1.00766	0.920395	0.806576	-1.02128	0.362883	0.950953	1.22722	0.910585	0.736096	1.02394	0.891698	0.893176	-1.0291	0.380808	0.590642	1.21789	0.939359	0.465993	1.01616	0.420269	0.306157	-1.19852	0.67337	0.993819	-1.09301
ssc-miR-194-5p_st	MIMAT0000224	0.753851	0.937124	-1.03193	0.0646684	0.981945	-1.20989	0.107041	0.632141	-1.17944	0.251462	0.327531	-1.12317	0.150234	0.993609	-1.15797	0.0911116	0.412849	-1.20192	0.0926848	0.522869	-1.2008	0.854509	0.857757	1.01854	0.79924	0.79924	-1.02582	0.86587	0.979981	-1.01811	0.62625	0.695833	1.05009	0.661979	0.893176	-1.04484	0.732696	0.662915	-1.03699	0.760876	0.421925	1.03098	0.530698	0.329399	1.06911	0.119726	0.993819	-1.17245
ssc-miR-195_st	MIMAT0000225	0.803446	0.937124	-1.02921	0.840706	0.981945	-1.02352	0.787269	0.858953	1.03171	0.592416	0.449936	1.06401	0.239377	0.993609	-1.14755	0.512902	0.588336	1.08386	0.933152	0.774679	1.01034	0.151251	0.626353	-1.18394	0.63821	0.766713	-1.05597	0.864496	0.979981	-1.02115	0.78989	0.723232	1.0313	0.326423	0.744973	1.12119	0.233341	0.506683	1.15942	0.0918378	0.168407	1.22101	0.673442	0.381194	1.05312	0.961748	0.993819	1.00556
ssc-miR-196b-3p_st	MIMAT0009201	0.874483	0.937124	1.01626	0.400139	0.981945	1.09024	0.914503	0.871116	1.01102	0.537458	0.424309	-1.06519	0.439059	0.993609	1.08262	0.0544071	0.383882	1.2398	0.945869	0.774679	-1.00738	0.50425	0.740794	1.07082	0.461924	0.669038	1.07836	0.865727	0.979981	-1.01848	0.469793	0.671132	-1.07693	0.945217	0.893176	1.00704	0.425544	0.604511	-1.09061	0.169397	0.235675	-1.1532	0.6071	0.359643	-1.05739	0.492904	0.993819	1.0728
ssc-miR-199a_st	MIMAT0000229	0.619442	0.937124	1.08513	0.730586	0.981945	-1.05821	0.890136	0.871116	-1.02294	0.656792	0.471946	1.0758	0.775123	0.993609	-1.04805	0.333329	0.549486	1.18505	0.0163665	0.332444	-1.55143	0.882583	0.857757	-1.02455	0.83643	0.806576	-1.03449	0.022182	0.443071	-1.51665	0.560851	0.69219	1.10048	0.953102	0.893176	-1.0097	0.0304392	0.317509	-1.48031	0.466798	0.392268	1.12749	0.00586059	0.0351635	1.66903	0.402377	0.993819	-1.1483
ssc-miR-199a-3p_st	MIMAT0000232	0.962123	0.944005	-1.00691	0.748038	0.981945	-1.04769	0.118629	0.632141	-1.25971	0.0323198	0.142705	-1.38069	0.831009	0.993609	-1.03142	0.720852	0.637911	-1.05652	0.3601	0.629755	-1.1522	0.174375	0.626353	1.22133	0.20954	0.504978	1.20237	0.562743	0.978389	1.09331	0.528257	0.69219	-1.09604	0.91399	0.893176	-1.01578	0.473202	0.625694	-1.11709	0.0513746	0.165495	-1.33863	0.244595	0.239753	-1.19831	0.784206	0.993819	-1.04051
ssc-miR-199a-5p_st	MIMAT0000229	0.489031	0.924695	1.14191	0.683204	0.981945	-1.0812	0.458262	0.787303	-1.15298	0.704154	0.494054	1.07533	0.868566	0.993609	1.03212	0.379744	0.579083	1.19619	0.0548146	0.468809	-1.49413	0.365781	0.699099	1.19002	0.736734	0.789682	1.06639	0.20694	0.950953	-1.29588	0.265457	0.635529	1.23983	0.566917	0.893176	-1.11593	0.0392529	0.317509	-1.54212	0.830094	0.436892	1.04186	0.0249881	0.0714328	1.60668	0.274734	0.993819	-1.23463
ssc-miR-199a-star_st	MIMAT0000230	0.276589	0.874739	1.1785	0.752919	0.981945	1.04821	0.247191	0.632141	-1.19115	0.115487	0.227187	-1.27156	0.88794	0.993609	1.02129	0.78735	0.64198	-1.04371	0.247917	0.629755	-1.2035	0.196054	0.626353	1.2165	0.144608	0.445551	1.24857	0.948095	0.979981	-1.01037	0.662538	0.711715	-1.06751	0.861805	0.893176	1.02636	0.199357	0.480988	-1.22912	0.0880695	0.168407	-1.29862	0.728845	0.388142	-1.05655	0.435446	0.993819	-1.1243
ssc-miR-199b_st	MIMAT0000263	0.646715	0.937124	1.05613	0.952955	0.981945	-1.00704	0.900187	0.871116	-1.01503	0.730341	0.503683	-1.04189	0.777451	0.993609	-1.03422	0.309132	0.549486	1.1382	0.522539	0.657089	-1.08432	0.874963	0.857757	-1.0189	0.947026	0.806576	1.00793	0.601545	0.978389	-1.06826	0.826271	0.728058	-1.02646	0.822959	0.893176	1.02698	0.707994	0.662915	-1.04845	0.950416	0.465993	-1.00742	0.751927	0.39345	1.04072	0.605174	0.993819	-1.06357
ssc-miR-199b-star_st	MIMAT0000230	0.875833	0.937124	1.02218	0.604906	0.981945	1.0755	0.19268	0.632141	-1.20382	0.153094	0.263962	-1.22635	0.860144	0.993609	-1.02505	0.745672	0.639987	-1.04952	0.335849	0.629755	-1.15536	0.257231	0.626353	1.17441	0.0733709	0.445551	1.29471	0.78266	0.979981	1.04195	0.89493	0.736096	-1.01871	0.488963	0.825601	1.10243	0.424009	0.604511	-1.12713	0.207546	0.266085	-1.19639	0.689138	0.384582	-1.06145	0.717469	0.993819	1.05216
ssc-miR-19a_st	MIMAT0000073	0.115702	0.737134	-1.81533	0.119286	0.981945	-1.8044	0.0223564	0.632141	-2.42683	0.273245	0.327531	-1.50802	0.781273	0.993609	1.10863	0.187394	0.509502	-1.69332	0.0663394	0.513341	-2.10413	0.0115898	0.347694	2.69044	0.427064	0.641616	1.34495	0.717317	0.978389	1.15336	0.206001	0.602084	1.60928	0.0693253	0.716076	-2.00041	0.0380849	0.317509	-2.33269	0.172885	0.235675	-1.67183	0.400289	0.305305	1.39529	0.987018	0.993819	1.00606
ssc-miR-19b_st	MIMAT0000074	0.299266	0.874739	-1.22448	0.372552	0.981945	-1.18953	0.100272	0.632141	-1.38421	0.526886	0.421508	-1.1306	0.712308	0.993609	1.07398	0.62648	0.615554	1.10517	0.0995834	0.522869	-1.41282	0.0473459	0.483603	1.48662	0.435382	0.641616	1.16367	0.920544	0.979981	-1.02067	0.299572	0.658343	1.22432	0.21122	0.716076	-1.27753	0.0491487	0.317509	-1.51734	0.319397	0.329276	-1.21424	0.281871	0.251172	1.24962	0.880944	0.993819	1.02938
ssc-miR-20_st	MIMAT0000075	0.982492	0.944005	1.00371	0.893072	0.981945	1.02296	0.220416	0.632141	-1.23314	0.0888346	0.196883	-1.34243	0.0823476	0.993609	1.35116	0.495801	0.588336	1.13027	0.628553	0.694829	-1.09069	0.00476418	0.285851	1.66617	0.175636	0.478804	1.26145	0.494775	0.978389	1.13061	0.615768	0.693823	-1.08863	0.106964	0.716076	-1.32084	0.0369649	0.317509	-1.4737	0.00127218	0.042406	-1.81384	0.251491	0.239753	-1.23081	0.910441	0.993819	1.01918
ssc-miR-202_st	MIMAT0002810	0.0900967	0.724422	1.27677	0.197209	0.981945	1.202	0.457631	0.787303	1.11068	0.901708	0.543744	-1.01753	0.899501	0.993609	1.01793	0.805354	0.647246	1.03747	0.0151417	0.332444	1.46412	0.536627	0.743022	-1.09112	0.575372	0.721361	1.08221	0.0716786	0.770396	1.31822	0.387442	0.666377	-1.13015	0.242817	0.716076	1.18083	0.0200344	0.317509	1.43834	0.802822	0.424774	-1.03577	0.0114478	0.0477644	-1.48979	0.668414	0.993819	-1.06221
ssc-miR-204_st	MIMAT0000237	0.232843	0.853657	-1.13541	0.894918	0.981945	-1.01399	0.0941902	0.632141	-1.19753	0.047211	0.15737	-1.24088	0.60593	0.993609	-1.05588	0.441017	0.588336	-1.09021	0.0473804	0.438702	-1.257	0.23684	0.626353	1.13415	0.121142	0.445551	1.18101	0.664397	0.978389	-1.04966	0.735468	0.721932	-1.0362	0.70063	0.893176	1.04131	0.125467	0.428306	-1.19048	0.132089	0.201822	-1.17521	0.907904	0.406876	1.01299	0.286801	0.993819	1.11974
ssc-miR-205_st	MIMAT0000238	0.807051	0.937124	1.03211	0.267163	0.981945	1.15605	0.677153	0.858953	1.0554	0.174607	0.275696	1.19522	0.869474	0.993609	-1.02148	0.307344	0.549486	1.15173	0.692923	0.721794	1.05574	0.562133	0.753171	-1.07808	0.483068	0.676296	1.09536	0.998166	0.979981	1.00032	0.339778	0.661912	1.13248	0.204728	0.716076	1.18088	0.583022	0.662915	1.07842	0.130139	0.201822	1.2209	0.368908	0.291243	1.13212	0.383597	0.993819	1.12009
ssc-miR-206_st	MIMAT0000239	0.682505	0.937124	1.27951	0.907828	0.981945	1.07216	0.694437	0.858953	1.26705	0.0347396	0.14375	-3.74285	0.490096	0.993609	1.51734	0.762031	0.64198	1.21338	0.412437	0.657089	-1.69228	0.764664	0.840485	1.19754	0.781487	0.791632	-1.18177	0.237568	0.950953	-2.1442	0.0140434	0.224695	-4.74237	0.564929	0.893176	-1.41522	0.146674	0.428739	-2.56777	0.00674107	0.0701934	-5.67917	0.219481	0.239753	-2.21172	0.769048	0.993819	-1.1934
ssc-miR-208b_st	MIMAT0004939	0.800065	0.937124	-1.07713	0.858695	0.981945	-1.0536	0.750937	0.858953	1.09762	0.817678	0.511816	-1.06996	0.798895	0.993609	1.07761	0.669012	0.62674	1.14242	0.448059	0.657089	-1.26754	0.949962	0.857757	-1.01857	0.620789	0.766713	-1.15645	0.292822	0.950953	-1.39128	0.58443	0.69219	-1.17441	0.665511	0.893176	-1.13537	0.320061	0.581526	-1.36591	0.627967	0.405354	-1.153	0.586749	0.354412	1.18466	0.939965	0.993819	1.02233
ssc-miR-21_st	MIMAT0000076	0.833724	0.937124	1.1465	0.844604	0.981945	-1.13615	0.256924	0.632141	-2.10884	0.13527	0.24973	-2.69393	0.750232	0.993609	-1.2305	0.75893	0.64198	1.23624	0.519655	0.657089	-1.5623	0.410633	0.72425	1.71381	0.345724	0.580816	1.85613	0.664478	0.978389	1.34983	0.707159	0.711715	-1.27744	0.902489	0.893176	1.08304	0.729789	0.662915	-1.26965	0.23433	0.284926	-2.1893	0.43249	0.306157	-1.72433	0.6851	0.993819	-1.3026
ssc-miR-210_st	MIMAT0000267	0.305034	0.874739	1.31631	0.36023	0.981945	1.27724	0.580132	0.833939	1.15869	0.0924409	0.198088	-1.58054	0.613872	0.993609	-1.14371	0.157419	0.507237	-1.49939	0.524053	0.657089	-1.19731	0.293535	0.644344	-1.32521	0.71407	0.789682	1.10232	0.250448	0.950953	-1.38731	0.028747	0.373736	-1.83135	0.160498	0.716076	1.4608	0.870879	0.689446	-1.04686	0.228893	0.282584	-1.38193	0.32813	0.270933	-1.32007	0.909686	0.993819	-1.03059
ssc-miR-214_st	MIMAT0000271	0.461885	0.924695	-1.13078	0.326163	0.981945	-1.17893	0.672423	0.858953	-1.07295	0.87959	0.538572	1.02552	0.570119	0.993609	-1.09932	0.0631933	0.383882	-1.40139	0.0303853	0.395727	-1.48808	0.883971	0.857757	-1.02457	0.572119	0.721361	-1.09877	0.0712803	0.770396	-1.3869	0.566383	0.69219	1.10033	0.67458	0.893176	-1.07243	0.0936964	0.386066	-1.35364	0.472874	0.394062	1.12737	0.0219595	0.0709526	1.52605	0.802071	0.993819	-1.04259
ssc-miR-216_st	MIMAT0000273	0.0684917	0.720774	1.20954	0.179207	0.981945	-1.1485	0.351699	0.728236	1.09992	0.68632	0.490229	1.04191	0.193486	0.993609	-1.14329	0.636317	0.619234	1.05233	0.452504	0.657089	-1.08467	0.0301389	0.452083	-1.25752	0.0272466	0.357963	-1.26326	0.108745	0.894707	-1.19305	0.594397	0.69219	-1.05568	0.964264	0.893176	-1.00456	0.625646	0.662915	1.05404	0.0924734	0.168407	1.1912	0.261004	0.239753	1.13012	0.00273686	0.189756	-1.38916
ssc-miR-218b_st	MIMAT0000275	0.79215	0.937124	-1.0529	0.354973	0.981945	1.1998	0.0822958	0.632141	-1.41701	0.24192	0.327531	-1.26043	0.753804	0.993609	-1.06329	0.989169	0.694456	-1.00282	0.378126	0.640058	-1.20198	0.148983	0.626353	1.33267	0.0103146	0.323489	1.70013	0.429828	0.975282	1.1789	0.55043	0.69219	1.12422	0.218801	0.716076	1.27574	0.555528	0.662915	-1.13043	0.387316	0.355335	-1.18541	0.818951	0.397337	-1.04863	0.237475	0.993819	1.26327
ssc-miR-221_st	MIMAT0000278	0.462287	0.924695	1.10814	0.689876	0.981945	1.05713	0.553521	0.821353	-1.08614	0.0204617	0.140929	-1.40142	0.922267	0.993609	-1.01366	0.729455	0.637911	1.05239	0.705025	0.725273	1.05749	0.62015	0.791681	1.0715	0.324296	0.567275	1.14819	0.351139	0.950953	1.14858	0.0744638	0.464597	-1.29027	0.619814	0.893176	1.07157	0.638261	0.662915	1.07194	0.0256065	0.114318	-1.38253	0.0115713	0.0477644	-1.48198	0.734937	0.993819	-1.04825
ssc-miR-222_st	MIMAT0000279	0.730955	0.937124	1.06003	0.474306	0.981945	1.12942	0.611739	0.846316	-1.08997	0.497407	0.411647	-1.12229	0.675714	0.993609	-1.07353	0.47144	0.588336	-1.13875	0.96099	0.774679	1.00882	0.928482	0.857757	1.01532	0.225477	0.504978	1.23103	0.598001	0.978389	1.09959	0.863059	0.736096	-1.02965	0.260426	0.716076	1.21246	0.657654	0.662915	1.083	0.793218	0.421925	-1.04542	0.491194	0.31804	-1.13219	0.708437	0.993819	1.06546
ssc-miR-22-3p_st	MIMAT0000077	0.72513	0.937124	1.04675	0.80489	0.981945	1.03261	0.825357	0.858953	1.02907	0.379766	0.365947	1.12162	0.91264	0.993609	1.01435	0.61237	0.615554	1.07242	0.668362	0.705252	1.06086	0.911601	0.857757	-1.01452	0.978938	0.806576	1.00343	0.825213	0.979981	1.03089	0.508685	0.690118	1.08993	0.890708	0.893176	1.018	0.744934	0.669358	1.04586	0.441013	0.390277	1.10575	0.686284	0.384582	1.05727	0.91652	0.993819	-1.0137
ssc-miR-22-5p_st	MIMAT0004495	0.412197	0.924695	1.2261	0.189642	0.981945	1.38952	0.716389	0.858953	-1.09406	0.0508783	0.160003	-1.64635	0.850387	0.993609	-1.04774	0.402255	0.583269	1.24719	0.25495	0.629755	1.35221	0.861106	0.857757	1.04421	0.0978139	0.445551	1.52022	0.142428	0.894707	1.47939	0.105872	0.529361	-1.50481	0.135919	0.716076	1.45586	0.190308	0.474906	1.41676	0.0751211	0.168407	-1.57133	0.00442222	0.0316555	-2.22621	0.613465	0.993819	1.13329
ssc-miR-2320_st	ssc-miR-2320_st	0.0179346	0.582516	2.10187	0.476164	0.981945	1.23865	0.64301	0.858953	-1.14899	0.0231605	0.140929	-2.03375	0.657066	0.993609	1.14226	0.0128821	0.311319	-2.29807	0.547382	0.657089	1.21103	0.366636	0.699099	1.31245	0.243471	0.504978	1.4232	0.302092	0.950953	1.39146	0.0637552	0.464597	-1.77003	0.78664	0.893176	1.08438	0.853853	0.688685	1.0602	0.00799289	0.0701934	-2.32308	0.00754711	0.0377355	-2.46292	0.0847452	0.993819	-1.69691
ssc-miR-2320-star_st	ssc-miR-2320-star_st	0.759885	0.937124	-1.08237	0.775745	0.981945	-1.07656	0.176743	0.632141	-1.42624	0.257102	0.327531	-1.34512	0.346979	0.993609	-1.27789	0.409751	0.586311	-1.25555	0.753233	0.726153	-1.0902	0.671737	0.813627	1.11609	0.281809	0.526043	1.32481	0.331521	0.950953	1.30823	0.821066	0.728058	1.0603	0.509229	0.835953	1.18701	0.563887	0.662915	1.17216	0.842988	0.439057	-1.05261	0.446202	0.306157	-1.23383	0.983397	0.993819	1.0054
ssc-miR-23a_st	MIMAT0000078	0.178994	0.768505	1.09886	0.767027	0.981945	-1.02069	0.775958	0.858953	1.01987	0.114119	0.227187	-1.11794	0.872404	0.993609	1.01116	0.781173	0.64198	1.02058	0.928956	0.774679	-1.00655	0.901214	0.857757	-1.00861	0.56217	0.721361	-1.04097	0.720885	0.978389	-1.02655	0.0651323	0.464597	-1.14016	0.648158	0.893176	-1.03208	0.809942	0.683951	-1.01779	0.0836601	0.168407	-1.13042	0.158996	0.211888	-1.11066	0.104327	0.993819	-1.1216
ssc-miR-23b_st	MIMAT0000125	0.0791048	0.720774	1.12522	0.547676	0.981945	1.04026	0.0805689	0.632141	1.12454	0.231572	0.323123	1.08248	0.944094	0.993609	1.0046	0.521626	0.588336	1.04565	0.199193	0.574688	1.09459	0.0925125	0.546715	-1.11939	0.239405	0.504978	-1.08102	0.697684	0.978389	-1.02737	0.561332	0.69219	-1.03886	0.594943	0.893176	1.0355	0.222348	0.50443	1.08958	0.259087	0.296386	1.07752	0.8727	0.40073	-1.01119	0.235878	0.993819	-1.08167
ssc-miR-24_st	MIMAT0000080	0.10815	0.724422	-1.05554	0.148222	0.981945	-1.04963	0.459028	0.787303	1.02478	0.724161	0.502308	1.01169	0.992721	0.994275	1.0003	0.229836	0.532561	-1.04335	0.00378352	0.307411	-1.11481	0.464504	0.72425	-1.02448	0.0330731	0.357963	-1.07565	0.000580929	0.118632	-1.14244	0.696451	0.711715	-1.01294	0.14581	0.716076	-1.04995	0.00370042	0.307934	-1.11514	0.73099	0.421925	1.01139	0.00157676	0.0294764	1.12785	0.86466	0.993819	1.00563
ssc-miR-2476_st	ssc-miR-2476_st	0.369625	0.924695	-1.14311	0.731127	0.981945	-1.05225	0.817838	0.858953	-1.03471	0.246604	0.327531	-1.18949	0.941384	0.993609	1.01095	0.669964	0.62674	-1.06934	0.362964	0.629755	1.15474	0.761335	0.840485	1.04604	0.909612	0.806576	-1.01695	0.262133	0.950953	1.19482	0.350028	0.663753	-1.14959	0.676758	0.893176	-1.06377	0.399935	0.601882	1.14224	0.21886	0.273575	-1.20251	0.0504594	0.103213	-1.37355	0.576931	0.993819	1.08635
ssc-miR-24-star_st	MIMAT0004497	0.37891	0.924695	1.17026	0.818914	0.981945	-1.0415	0.737326	0.858953	-1.06141	0.394431	0.371763	-1.16429	0.251511	0.993609	-1.22856	0.791245	0.64198	1.05113	0.205464	0.574688	-1.27337	0.412694	0.72425	-1.15748	0.915057	0.806576	1.01912	0.33733	0.950953	-1.1997	0.6031	0.69219	-1.09693	0.355591	0.768721	1.17961	0.849156	0.688685	-1.03647	0.762304	0.421925	1.0552	0.634981	0.361698	1.09369	0.2699	0.993819	-1.21883
ssc-miR-26a_st	MIMAT0000082	0.280894	0.874739	-1.03405	0.71694	0.981945	-1.01122	0.130185	0.632141	-1.04859	0.314221	0.342786	-1.0317	0.91117	0.993609	-1.00344	0.125854	0.490266	-1.05224	0.0282106	0.395727	-1.07742	0.159232	0.626353	1.045	0.243359	0.504978	1.03695	0.408221	0.950953	-1.0275	0.598322	0.69219	1.01637	0.801624	0.893176	-1.00776	0.0356664	0.317509	-1.07373	0.369524	0.34676	-1.02817	0.190047	0.232776	1.04431	0.46978	0.993819	1.02257
ssc-miR-27a_st	MIMAT0000084	0.679525	0.937124	1.06445	0.701815	0.981945	-1.05958	0.37013	0.7323	-1.14595	0.797673	0.511816	-1.03948	0.794285	0.993609	-1.04018	0.105523	0.458289	1.30349	0.15268	0.531457	-1.26241	0.522671	0.740794	1.10169	0.60458	0.752367	1.08151	0.546769	0.978389	-1.10163	0.519844	0.69219	1.10242	0.902558	0.893176	-1.01866	0.232215	0.506683	-1.21365	0.996491	0.479082	1.00066	0.230656	0.239753	1.21446	0.42788	0.993819	-1.12787
ssc-miR-27b_st	MIMAT0000126	0.788768	0.937124	-1.02869	0.924012	0.981945	1.01012	0.207806	0.632141	-1.14422	0.145355	0.260337	-1.16935	0.923099	0.993609	-1.01024	0.876446	0.66443	1.01756	0.316047	0.629755	-1.11983	0.243367	0.626353	1.13262	0.176701	0.478804	1.15579	0.847406	0.979981	1.02178	0.83691	0.731725	-1.02197	0.847846	0.893176	1.02046	0.360879	0.581526	-1.10848	0.172461	0.235675	-1.1575	0.699388	0.385191	-1.04422	0.716562	0.993819	1.0391
ssc-miR-27b-star_st	MIMAT0004522	0.263846	0.868492	1.27527	0.948532	0.981945	1.014	0.910948	0.871116	1.02438	0.364009	0.361037	-1.21754	0.779072	0.993609	1.06231	0.861442	0.66441	1.04068	0.351655	0.629755	1.23898	0.865938	0.857757	1.03703	0.962273	0.806576	-1.01024	0.407684	0.950953	1.20949	0.309148	0.658343	-1.24722	0.828927	0.893176	-1.04765	0.502202	0.625694	1.16631	0.237691	0.284926	-1.29341	0.0795116	0.1498	-1.50851	0.291565	0.993819	-1.25766
ssc-miR-28-3p_st	MIMAT0004502	0.188299	0.774772	1.15997	0.436622	0.981945	-1.0908	0.686117	0.858953	1.04601	0.00906321	0.120843	-1.36012	0.499678	0.993609	-1.07822	0.991396	0.694456	1.00127	0.119952	0.523723	1.20578	0.283808	0.644344	-1.12783	0.240864	0.504978	-1.14098	0.23353	0.950953	1.15275	0.00325134	0.0893735	-1.4227	0.916939	0.893176	-1.01166	0.0323109	0.317509	1.3001	0.0435739	0.158527	-1.26145	0.000201451	0.00906531	-1.64001	0.0410697	0.854251	-1.26529
ssc-miR-28-5p_st	MIMAT0000085	0.967822	0.944005	-1.0087	0.956876	0.981945	-1.01168	0.81678	0.858953	-1.05102	0.422786	0.378614	-1.1889	0.762697	0.993609	-1.06702	0.522868	0.588336	-1.15718	0.368165	0.629755	-1.22915	0.943894	0.857757	-1.01522	0.858982	0.806576	1.03889	0.493439	0.978389	-1.16948	0.566926	0.69219	-1.13118	0.804159	0.893176	1.05471	0.53578	0.659622	-1.15195	0.615161	0.405354	-1.11422	0.883757	0.401708	1.03386	0.989041	0.993819	-1.00295
ssc-miR-296_st	MIMAT0000374	0.705023	0.937124	1.06269	0.416221	0.981945	1.14016	0.529824	0.799079	1.10643	0.627535	0.456389	1.08112	0.340906	0.993609	1.16646	0.581987	0.601651	1.09847	0.560278	0.657089	1.1045	0.742122	0.840485	1.05426	0.851563	0.806576	1.03049	0.991844	0.979981	-1.00174	0.885355	0.736096	-1.02341	0.886968	0.893176	-1.02307	0.748624	0.669358	-1.0561	0.636454	0.405385	-1.07894	0.899951	0.406876	-1.02163	0.661504	0.993819	1.07289
ssc-miR-299_st	MIMAT0000377	0.192662	0.776547	1.35193	0.937261	0.981945	1.01812	0.961094	0.881795	1.01119	0.612996	0.456389	-1.1226	0.916522	0.993609	1.0242	0.476464	0.588336	-1.18891	0.857816	0.746742	-1.04432	0.955308	0.857757	1.01287	0.976118	0.806576	1.00685	0.821902	0.979981	-1.05601	0.579417	0.69219	-1.13517	0.979171	0.893176	-1.00597	0.781125	0.678463	-1.0696	0.541993	0.401629	-1.14977	0.765338	0.394877	-1.07496	0.219766	0.993819	-1.32787
ssc-miR-29a_st	MIMAT0000086	0.655529	0.937124	-1.08052	0.633107	0.981945	-1.08642	0.692798	0.858953	-1.07096	0.78781	0.511816	1.04778	0.964658	0.993609	-1.00771	0.209517	0.514916	1.26337	0.420274	0.657089	-1.16064	0.725657	0.837297	1.06277	0.934097	0.806576	-1.01444	0.66231	0.978389	-1.08373	0.507689	0.690118	1.12214	0.66481	0.893176	-1.07811	0.444379	0.615328	-1.15176	0.754	0.421925	1.05586	0.291733	0.254912	1.21609	0.974924	0.993819	-1.00546
ssc-miR-29c_st	MIMAT0000536	0.805664	0.937124	-1.11042	0.772935	0.981945	-1.13073	0.159155	0.632141	-1.83908	0.275728	0.327531	-1.59758	0.656892	0.993609	1.20844	0.506989	0.588336	1.35065	0.359259	0.629755	-1.51698	0.068112	0.483603	2.22242	0.258155	0.50998	1.62645	0.670136	0.978389	1.21233	0.741003	0.72293	1.15116	0.465154	0.818399	-1.36642	0.185829	0.474906	-1.83318	0.129512	0.201822	-1.93058	0.908689	0.406876	-1.05313	0.966027	0.993819	-1.01829
ssc-miR-30a-3p_st	MIMAT0000088	0.128712	0.747667	1.19435	0.566569	0.981945	1.0681	0.160259	0.632141	-1.17784	0.0901083	0.196883	-1.22029	0.389098	0.993609	1.10445	0.166462	0.507245	-1.18648	0.109396	0.522869	1.22011	0.0277125	0.452083	1.30087	0.0524596	0.383183	1.25805	0.00529019	0.407699	1.4371	0.757603	0.723232	-1.03604	0.770467	0.893176	-1.03404	0.415352	0.604511	1.10472	0.0134939	0.0841431	-1.34776	0.00249233	0.0294764	-1.48889	0.333586	0.993819	-1.1182
ssc-miR-30a-5p_st	MIMAT0000087	0.479896	0.924695	-1.08331	0.523486	0.981945	-1.07488	0.71768	0.858953	-1.04167	0.764257	0.510798	1.03443	0.969724	0.993609	-1.00429	0.136499	0.490266	1.19903	0.422601	0.657089	-1.10126	0.746151	0.840485	1.03722	0.780983	0.791632	-1.03188	0.642513	0.978389	-1.05721	0.509478	0.690118	1.07753	0.548245	0.887505	-1.07028	0.443268	0.615328	-1.09656	0.735549	0.421925	1.03887	0.280782	0.251172	1.13918	0.94477	0.993819	1.00784
ssc-miR-30b-3p_st	MIMAT0004589	0.746394	0.937124	1.06566	0.89132	0.981945	-1.02721	0.987253	0.883711	1.00314	0.00227791	0.0546699	-1.91536	0.29177	0.993609	-1.23256	0.0479471	0.383882	-1.53138	0.755448	0.726153	1.06712	0.284721	0.644344	-1.23643	0.878712	0.806576	-1.03044	0.766898	0.979981	1.06377	0.00218389	0.0873554	-1.92138	0.357086	0.768721	1.1999	0.194821	0.477625	1.31528	0.0310742	0.129476	-1.55397	0.00164586	0.0294764	-2.04391	0.645862	0.993819	-1.09466
ssc-miR-30b-5p_st	MIMAT0000130	0.873496	0.937124	-1.02176	0.622129	0.981945	-1.06903	0.252553	0.632141	-1.16928	0.617236	0.456389	-1.07004	0.667224	0.993609	-1.05994	0.315931	0.549486	1.15606	0.755537	0.726153	-1.04569	0.469617	0.72425	1.10316	0.508837	0.689392	1.09377	0.438209	0.978389	1.11819	0.513275	0.690118	1.09274	0.949597	0.893176	-1.00858	0.924794	0.713547	1.01363	0.944041	0.465993	-1.00953	0.872449	0.40073	-1.02329	0.738168	0.993819	-1.04627
ssc-miR-30c_st	MIMAT0000244	0.110039	0.724422	1.10116	0.667148	0.981945	1.02574	0.200582	0.632141	1.07958	0.170104	0.275696	1.08573	0.0709913	0.993609	1.11576	0.041742	0.383882	1.14113	0.0972766	0.522869	1.11208	0.577431	0.753171	1.03351	0.388884	0.634296	-1.05249	0.636218	0.978389	1.0301	0.923398	0.736096	1.00569	0.160894	0.716076	-1.08776	0.957916	0.714719	-1.00331	0.64436	0.407823	-1.02766	0.701904	0.385191	-1.02427	0.234804	0.993819	-1.07352
ssc-miR-30d_st	MIMAT0000245	0.669622	0.937124	1.02308	0.407287	0.981945	1.04552	0.909051	0.871116	1.00612	0.340974	0.352732	1.05258	0.762055	0.993609	-1.01631	0.853057	0.661684	-1.01055	0.511544	0.657089	1.03802	0.676931	0.813627	-1.02253	0.473902	0.669038	1.03916	0.582517	0.978389	1.03171	0.400741	0.666377	1.04618	0.26084	0.716076	1.06258	0.348494	0.581526	1.05496	0.212737	0.269287	1.06976	0.805878	0.397337	1.01402	0.685023	0.993819	1.02193
ssc-miR-30e-3p_st	MIMAT0000249	0.94803	0.944005	1.01509	0.726229	0.981945	1.08386	0.994175	0.883711	1.00168	0.00394612	0.0750799	-2.03706	0.659164	0.993609	1.10682	0.0422695	0.383882	-1.66965	0.126866	0.526059	1.46145	0.664431	0.81359	1.10497	0.731698	0.789682	1.08204	0.128489	0.894707	1.459	0.00387258	0.0893735	-2.04048	0.927271	0.893176	-1.02119	0.259168	0.525018	1.3204	0.00123063	0.042406	-2.25467	9.13903e-05	0.00822513	-2.97706	0.775545	0.993819	1.06775
ssc-miR-30e-5p_st	MIMAT0000692	0.395379	0.924695	-1.17205	0.600827	0.981945	-1.10226	0.482609	0.79005	-1.13985	0.331246	0.34868	1.19941	0.762581	0.993609	-1.05773	0.347949	0.560585	1.20467	0.16323	0.531457	-1.32198	0.687558	0.819606	1.07763	0.856702	0.806576	1.0341	0.453728	0.978389	-1.15979	0.0997543	0.529361	1.36715	0.82431	0.893176	-1.0421	0.262509	0.525018	-1.24983	0.206065	0.266085	1.26866	0.0249477	0.0714328	1.58561	0.741107	0.993819	1.06332
ssc-miR-32_st	MIMAT0000090	0.15841	0.768505	1.23436	0.415874	0.981945	-1.1276	0.877516	0.871116	1.02288	0.801194	0.511816	1.03767	0.899905	0.993609	-1.01864	0.745916	0.639987	-1.05179	0.662428	0.705252	1.07045	0.779659	0.84091	-1.04195	0.334702	0.567979	-1.1534	0.770498	0.979981	1.0465	0.922107	0.736096	1.01446	0.49045	0.825601	-1.10697	0.579286	0.662915	1.09039	0.705964	0.421074	1.05701	0.841738	0.398718	-1.03158	0.0304541	0.745352	-1.39186
ssc-miR-320_st	MIMAT0000510	0.291194	0.874739	1.19942	0.618899	0.981945	1.08879	0.626443	0.858953	1.08679	0.325897	0.347746	-1.18416	0.415273	0.993609	-1.15006	0.174769	0.509502	-1.2834	0.834648	0.737865	1.03852	0.197517	0.626353	-1.24987	0.991433	0.806576	1.00183	0.801916	0.979981	-1.04648	0.146517	0.540707	-1.28694	0.193961	0.716076	1.25217	0.330374	0.581526	1.19436	0.864069	0.443112	-1.02965	0.258333	0.239753	-1.22978	0.571709	0.993819	-1.10161
ssc-miR-323_st	MIMAT0000551	0.487449	0.924695	1.13069	0.34222	0.981945	1.18366	0.192581	0.632141	1.26224	0.753727	0.508547	1.05688	0.420445	0.993609	1.1534	0.569442	0.601651	1.11248	0.295275	0.629755	1.21823	0.609574	0.783738	-1.09436	0.715548	0.789682	-1.06638	0.84942	0.979981	-1.03613	0.317594	0.658343	-1.19431	0.883165	0.893176	1.02623	0.769972	0.675265	1.0562	0.62055	0.405354	-1.09133	0.449246	0.306157	-1.15267	0.795084	0.993819	1.04685
ssc-miR-324_st	MIMAT0000555	0.0802888	0.720774	1.56132	0.361358	0.981945	1.25626	0.908326	0.871116	-1.02899	0.000434594	0.0179234	-2.64554	0.213707	0.993609	-1.36707	0.695562	0.634318	-1.10865	0.535617	0.657089	-1.17773	0.257501	0.626353	-1.32855	0.305253	0.551551	1.29268	0.608821	0.978389	-1.14455	0.00059686	0.0710496	-2.571	0.0358566	0.716076	1.71739	0.572201	0.662915	1.16076	0.0117705	0.0784698	-1.93519	0.00418317	0.0316555	-2.2463	0.384104	0.993819	-1.24283
ssc-miR-326_st	MIMAT0000559	0.164782	0.768505	1.19095	0.963822	0.981945	-1.00563	0.462113	0.787303	1.09573	0.367858	0.361828	1.11874	0.858943	0.993609	-1.02224	0.084146	0.402786	1.26178	0.132405	0.526059	1.22303	0.362766	0.699099	-1.1201	0.435346	0.641616	-1.10189	0.405107	0.950953	1.11619	0.866653	0.736096	1.021	0.894676	0.893176	1.01652	0.0965165	0.386066	1.25024	0.282861	0.307457	1.14362	0.498746	0.318117	-1.09323	0.152059	0.993819	-1.19765
ssc-miR-328_st	MIMAT0000565	0.651245	0.937124	1.15894	0.566433	0.981945	-1.20596	0.5673	0.833939	1.20546	0.0961562	0.198944	-1.74179	0.165426	0.993609	-1.58294	0.305178	0.549486	-1.42969	0.848069	0.744926	1.06846	0.0546116	0.483603	-1.90817	0.255946	0.50998	-1.45374	0.727231	0.978389	-1.12822	0.0288294	0.373736	-2.09965	0.406459	0.770059	1.31259	0.135598	0.428306	1.6913	0.76926	0.421925	-1.10035	0.0798934	0.1498	-1.86102	0.308334	0.993819	-1.39764
ssc-miR-331-3p_st	MIMAT0000571	0.635619	0.937124	-1.04398	0.291164	0.981945	-1.10143	0.64769	0.858953	1.04238	0.80655	0.511816	-1.02246	0.188004	0.993609	-1.12877	0.0378152	0.383882	1.23026	0.789459	0.726153	-1.02603	0.0805131	0.517584	-1.17661	0.134991	0.445551	-1.14811	0.486481	0.978389	-1.06951	0.484004	0.676312	-1.06579	0.786954	0.893176	1.02482	0.324954	0.581526	1.10014	0.280017	0.307457	1.10398	0.971137	0.421998	1.00349	0.555778	0.993819	-1.05503
ssc-miR-331-5p_st	MIMAT0004643	0.402408	0.924695	1.22389	0.560854	0.981945	-1.15015	0.76782	0.858953	-1.07344	0.0188459	0.140929	-1.8051	0.28362	0.993609	-1.29654	0.00696377	0.311319	-2.07719	0.252298	0.629755	-1.34245	0.433509	0.72425	-1.20784	0.773657	0.791632	-1.07147	0.382461	0.950953	-1.25061	0.0368295	0.387504	-1.68161	0.618178	0.893176	1.12728	0.891224	0.698278	-1.03541	0.174399	0.235675	-1.39225	0.249747	0.239753	-1.34463	0.160931	0.993819	-1.40766
ssc-miR-335_st	MIMAT0000765	0.51504	0.933215	1.09688	0.23497	0.981945	1.18544	0.598502	0.846316	1.07756	0.815935	0.511816	1.03351	0.674631	0.993609	1.06131	0.381759	0.579083	-1.14128	0.977288	0.774679	1.00428	0.914508	0.857757	-1.01531	0.501844	0.689392	1.10011	0.639593	0.978389	-1.07296	0.768229	0.723232	-1.04262	0.436844	0.79371	1.11696	0.713251	0.662915	-1.05678	0.851278	0.441077	-1.0269	0.848497	0.399243	1.0291	0.584231	0.993819	1.08074
ssc-miR-339-3p_st	MIMAT0004702	0.840657	0.937124	-1.03954	0.748259	0.981945	1.06388	0.443619	0.787303	-1.16001	0.449969	0.380256	-1.1576	0.881991	0.993609	1.02904	0.0861128	0.402786	-1.43314	0.50242	0.657089	-1.14759	0.361801	0.699099	1.1937	0.279972	0.526043	1.23412	0.958023	0.979981	1.01082	0.991394	0.766295	1.00208	0.862889	0.893176	1.03386	0.418667	0.604511	-1.18092	0.367389	0.34676	-1.19122	0.966128	0.421998	-1.00872	0.60227	0.993819	1.10595
ssc-miR-339-5p_st	MIMAT0000584	0.405352	0.924695	1.12584	0.843102	0.981945	-1.02844	0.176721	0.632141	1.21446	0.0290407	0.140929	1.3799	0.169618	0.993609	1.21852	0.334682	0.549486	1.15726	0.485236	0.657089	-1.111	0.981179	0.857757	1.00335	0.123874	0.445551	-1.24899	0.0533835	0.726765	-1.34927	0.370411	0.666377	1.13622	0.118543	0.716076	-1.25317	0.050935	0.317509	-1.35378	0.382895	0.354532	1.13243	0.00748348	0.0377355	1.53307	0.304987	0.993819	-1.15786
ssc-miR-340_st	MIMAT0004651	0.378965	0.924695	-1.17837	0.290051	0.981945	-1.21891	0.221915	0.632141	-1.25768	0.409464	0.371763	-1.16621	0.277345	0.993609	-1.22551	0.587064	0.601651	1.11297	0.570151	0.657089	-1.11843	0.888847	0.857757	1.02625	0.865895	0.806576	1.0318	0.551776	0.978389	1.1245	0.684126	0.711715	1.07843	0.976761	0.893176	1.00541	0.64247	0.662915	1.09574	0.789114	0.421925	1.05085	0.831564	0.397337	-1.04272	0.855226	0.993819	-1.0344
ssc-miR-342_st	MIMAT0000590	0.877813	0.937124	1.01916	0.429668	0.981945	-1.10295	0.183047	0.632141	1.18154	0.030829	0.142288	1.31964	0.651805	0.993609	-1.05738	0.558904	0.601651	1.07976	0.150649	0.531457	1.21104	0.0789459	0.517584	-1.24934	0.0385938	0.357963	-1.30319	0.85063	0.979981	1.02497	0.373692	0.666377	1.11687	0.732676	0.893176	-1.0431	0.0664492	0.336676	1.28053	0.0107065	0.0766584	1.39535	0.513367	0.320854	1.08967	0.346891	0.993819	-1.12409
ssc-miR-345-3p_st	MIMAT0004656	0.769232	0.937124	-1.0826	0.811031	0.981945	-1.0668	0.28995	0.666886	-1.33482	0.000539764	0.0179234	-2.82488	0.138885	0.993609	-1.5032	0.0699538	0.383882	-1.70637	0.181308	0.566587	-1.47571	0.660856	0.81359	-1.12614	0.409738	0.635725	1.25124	0.726646	0.978389	-1.10555	0.0089322	0.178644	-2.11629	0.210643	0.716076	1.40907	0.948684	0.714719	1.01863	0.0253598	0.114318	-1.87925	0.0296488	0.075993	-1.91425	0.956631	0.993819	1.01481
ssc-miR-345-5p_st	MIMAT0000595	0.128229	0.747667	1.36574	0.788383	0.981945	1.05544	0.7712	0.858953	1.06021	0.793009	0.511816	1.05417	0.422853	0.993609	-1.17576	0.815631	0.648107	1.05097	0.365125	0.629755	-1.21452	0.2775	0.644344	-1.24655	0.982098	0.806576	-1.00452	0.240968	0.950953	-1.28765	0.9773	0.76277	-1.00573	0.287256	0.716076	1.24095	0.87906	0.692317	-1.03296	0.289912	0.311733	1.23945	0.25153	0.239753	1.28031	0.205707	0.993819	-1.294
ssc-miR-34a_st	MIMAT0000255	0.254606	0.866452	1.22368	0.518074	0.981945	1.12038	0.348997	0.728236	-1.17981	0.264059	0.327531	-1.21873	0.429212	0.993609	-1.14945	0.283052	0.549486	1.22324	0.48295	0.657089	1.13992	0.881744	0.857757	1.02642	0.118872	0.445551	1.32184	0.118444	0.894707	1.34488	0.853112	0.73386	-1.03299	0.15594	0.716076	1.28782	0.153069	0.438153	1.31027	0.738625	0.421925	-1.06028	0.0846321	0.152471	-1.38925	0.615552	0.993819	-1.0922
ssc-miR-361-3p_st	MIMAT0017075	0.054992	0.679221	-1.51988	0.110984	0.981945	-1.411	0.182932	0.632141	-1.33085	0.358131	0.361037	-1.21612	0.0411533	0.993609	-1.56416	0.0502623	0.383882	-1.57395	0.144426	0.531457	-1.39549	0.447044	0.72425	-1.17531	0.782208	0.791632	-1.06022	0.832557	0.979981	-1.04857	0.670248	0.711715	1.09435	0.626623	0.893176	1.10855	0.611613	0.662915	1.12087	0.239338	0.284926	1.28619	0.540779	0.333357	1.1475	0.725411	0.993819	1.07716
ssc-miR-361-5p_st	MIMAT0000703	0.788482	0.937124	1.02161	0.964541	0.981945	1.00355	0.731654	0.858953	-1.02771	0.803638	0.511816	-1.02001	0.289775	0.993609	-1.08883	0.129681	0.490266	-1.13941	0.351868	0.629755	-1.08243	0.470137	0.72425	-1.05947	0.698584	0.789682	1.03136	0.540372	0.978389	-1.05325	0.924721	0.736096	1.00755	0.270559	0.716076	1.09269	0.944382	0.714719	1.00591	0.414874	0.370424	1.06747	0.483694	0.317755	1.0612	0.82284	0.993819	-1.018
ssc-miR-362_st	MIMAT0000705	0.857341	0.937124	-1.05426	0.745682	0.981945	-1.1001	0.194515	0.632141	-1.4722	0.046892	0.15737	-1.82956	0.177135	0.993609	-1.49604	0.195619	0.509502	-1.50558	0.440342	0.657089	-1.27346	0.95641	0.857757	-1.01619	0.325463	0.567275	1.33824	0.642374	0.978389	1.15606	0.461687	0.666377	-1.24274	0.299941	0.723189	1.35991	0.606131	0.662915	1.17478	0.495174	0.401629	-1.22293	0.250374	0.239753	-1.43668	0.884875	0.993819	-1.04348
ssc-miR-363_st	MIMAT0000707	0.99312	0.944005	-1.00491	0.481966	0.981945	1.49368	0.0290028	0.632141	-3.64171	0.0214693	0.140929	-3.92511	0.698926	0.993609	-1.24616	0.569126	0.601651	-1.41072	0.757658	0.726153	1.20457	0.0666839	0.483603	2.92235	0.00531666	0.323489	5.43954	0.0192563	0.443071	4.38671	0.895093	0.736096	-1.07782	0.279011	0.716076	1.86136	0.501995	0.625694	1.50109	0.0506715	0.165495	-3.14978	0.0143596	0.0538486	-4.72809	0.476676	0.993819	1.50102
ssc-miR-365-3p_st	MIMAT0000710	0.79203	0.937124	-1.03105	0.0998452	0.981945	-1.21551	0.525006	0.799079	-1.07672	0.0461446	0.15737	-1.27009	0.733913	0.993609	-1.04022	0.551595	0.601651	-1.07617	0.611687	0.685511	-1.06454	0.766203	0.840485	1.03509	0.299888	0.551551	-1.1289	0.926249	0.979981	1.01144	0.161047	0.572612	-1.17959	0.185544	0.716076	-1.16851	0.850939	0.688685	-1.02338	0.0926237	0.168407	-1.22098	0.157925	0.211888	-1.19309	0.162472	0.993819	-1.17891
ssc-miR-365-5p_st	MIMAT0017179	0.35998	0.924695	1.13982	0.259685	0.981945	1.17554	0.989479	0.883711	1.00187	0.436481	0.380256	-1.11743	0.798485	0.993609	-1.03693	0.879797	0.66443	-1.02303	0.367848	0.629755	1.14628	0.788336	0.844645	-1.03887	0.265124	0.511964	1.17335	0.374364	0.950953	1.14413	0.428867	0.666377	-1.11952	0.169862	0.716076	1.21895	0.256339	0.525018	1.1886	0.599257	0.405354	-1.07763	0.107762	0.179603	-1.28088	0.827949	0.993819	1.03134
ssc-miR-374a_st	MIMAT0000727	0.423593	0.924695	-1.13709	0.68915	0.981945	1.06605	0.362016	0.728236	-1.15788	0.971253	0.563045	-1.00577	0.816734	0.993609	1.03772	0.232938	0.532561	-1.2269	0.41763	0.657089	-1.14803	0.255422	0.626353	1.20155	0.193689	0.493027	1.23436	0.959799	0.979981	1.00857	0.380914	0.666377	1.15123	0.866066	0.893176	1.02731	0.305599	0.580638	-1.19133	0.788908	0.421925	-1.04371	0.437099	0.306157	1.14145	0.233773	0.993819	1.2122
ssc-miR-374b-5p_st	MIMAT0003727	0.164369	0.768505	1.50609	0.0279465	0.981945	1.94194	0.9222	0.871116	1.0287	0.292048	0.327531	-1.36088	0.482261	0.993609	1.22682	0.787635	0.64198	1.08635	0.144013	0.531457	1.57958	0.544478	0.748137	1.19259	0.0347583	0.357963	1.88776	0.169601	0.91338	1.53551	0.250822	0.635529	-1.39994	0.120406	0.716076	1.58291	0.413439	0.604511	1.28755	0.0845403	0.168407	-1.66955	0.0176427	0.0635138	-2.14963	0.383374	0.993819	1.28939
ssc-miR-376a_st	MIMAT0000729	0.70657	0.937124	-1.04888	0.406071	0.981945	-1.11162	0.870849	0.871116	-1.0208	0.308019	0.342244	1.13907	0.475435	0.993609	1.095	0.181102	0.509502	1.20004	0.810459	0.735752	-1.03275	0.382283	0.70939	1.11778	0.502524	0.689392	-1.08896	0.930967	0.979981	-1.0117	0.239154	0.635529	1.16277	0.12797	0.716076	-1.21722	0.363183	0.581526	-1.13086	0.755496	0.421925	1.04025	0.232097	0.239753	1.17638	0.646977	0.993819	-1.05981
ssc-miR-378_st	MIMAT0000732	0.436518	0.924695	1.04966	0.816619	0.981945	1.01448	0.209324	0.632141	-1.08204	0.706539	0.494054	-1.02364	0.0242688	0.993609	-1.15699	0.00069811	0.101226	-1.27934	0.0747582	0.522869	-1.12788	0.284524	0.644344	-1.06926	0.139755	0.445551	1.09771	0.529245	0.978389	-1.04237	0.373791	0.666377	1.05706	0.0141047	0.671601	1.17374	0.698691	0.662915	1.0258	0.0554771	0.165495	1.13027	0.147246	0.211888	1.10184	0.583222	0.993819	-1.03468
ssc-miR-382_st	MIMAT0000737	0.0919552	0.724422	1.70752	0.118977	0.981945	1.63767	0.787513	0.858953	1.08718	0.395969	0.371763	-1.30301	0.145981	0.993609	1.58209	0.463712	0.588336	-1.27374	0.741037	0.726153	1.11487	0.231726	0.626353	1.45522	0.192564	0.493027	1.50635	0.939022	0.979981	1.02547	0.266128	0.635529	-1.41661	0.911287	0.893176	1.03514	0.291519	0.568088	-1.41908	0.0253279	0.114318	-2.06147	0.261065	0.239753	-1.45268	0.892812	0.993819	-1.04265
ssc-miR-383_st	MIMAT0017082	0.102114	0.724422	-1.18485	0.0703315	0.981945	-1.20775	0.550524	0.821353	1.06261	0.699772	0.494054	-1.03994	0.925282	0.993609	-1.00956	0.248765	0.538371	-1.1337	0.557122	0.657089	1.0654	0.49033	0.729417	-1.07277	0.0189595	0.353911	-1.28337	0.98061	0.979981	1.00262	0.32859	0.658343	-1.10505	0.0848716	0.716076	-1.19631	0.499893	0.625694	1.07558	0.770199	0.421925	-1.03009	0.344314	0.279173	-1.10795	0.850355	0.993819	-1.01933
ssc-miR-411_st	MIMAT0001093	0.452629	0.924695	-1.14864	0.890876	0.981945	1.02552	0.946549	0.881795	-1.01239	0.445659	0.380256	-1.15113	0.697749	0.993609	1.07402	0.566822	0.601651	-1.11836	0.340075	0.629755	-1.20594	0.649035	0.812965	1.08732	0.838205	0.806576	1.03822	0.372309	0.950953	-1.19118	0.486099	0.676312	-1.13705	0.801424	0.893176	-1.04729	0.190587	0.474906	-1.2952	0.253216	0.294437	-1.23634	0.811351	0.397337	1.04761	0.375648	0.993819	1.17795
ssc-miR-423-3p_st	MIMAT0001340	0.0786141	0.720774	1.21451	0.401958	0.981945	-1.09498	0.999852	0.884485	-1.00002	0.131309	0.246204	-1.18007	0.0418665	0.993609	-1.25468	0.0570044	0.383882	-1.25117	0.20566	0.574688	-1.15771	0.0418832	0.482647	-1.25465	0.40206	0.635134	-1.09496	0.20572	0.950953	-1.15769	0.131353	0.540707	-1.18004	0.211886	0.716076	1.14584	0.482842	0.625694	1.08376	0.569945	0.405354	1.06323	0.866958	0.40073	-1.01931	0.0120967	0.441322	-1.32986
ssc-miR-423-5p_st	MIMAT0004748	0.584917	0.937124	-1.10107	0.471615	0.981945	-1.13556	0.459582	0.787303	-1.13955	0.267366	0.327531	-1.21783	0.0483056	0.993609	-1.43185	0.0659123	0.383882	-1.42335	0.441773	0.657089	-1.15509	0.200325	0.626353	-1.2565	0.984084	0.806576	1.00351	0.942136	0.979981	-1.01363	0.705909	0.711715	-1.06869	0.193686	0.716076	1.26092	0.254654	0.525018	1.23961	0.360575	0.34676	1.17574	0.776854	0.394877	-1.05432	0.860785	0.993819	-1.03133
ssc-miR-424_st	MIMAT0001341	0.78141	0.937124	-1.03649	0.227056	0.981945	1.17101	0.381374	0.746519	1.12044	0.258133	0.327531	1.15899	0.601121	0.993609	1.06998	0.515529	0.588336	1.09346	0.888327	0.759754	1.01941	0.72133	0.837297	-1.04717	0.732636	0.789682	1.04513	0.491782	0.978389	-1.09911	0.79338	0.723232	1.03441	0.486326	0.825601	1.09442	0.723928	0.662915	-1.0496	0.537135	0.401629	1.0832	0.352127	0.280455	1.13692	0.140683	0.993819	1.21374
ssc-miR-424-star_st	MIMAT0004749	0.352399	0.924695	1.44621	0.241463	0.981945	1.59476	0.413465	0.771904	-1.38253	0.0435974	0.15737	-2.27707	0.0999204	0.993609	-1.94074	0.0736429	0.383882	-2.15527	0.531403	0.657089	-1.29993	0.3921	0.720184	-1.40376	0.0519227	0.383183	2.2048	0.88278	0.979981	1.06354	0.21121	0.602084	-1.64703	0.00704736	0.671601	3.09501	0.341084	0.581526	1.49295	0.685301	0.415334	-1.1733	0.186107	0.232633	-1.75169	0.804029	0.993819	1.10272
ssc-miR-425-3p_st	MIMAT0001343	0.233295	0.853657	1.20178	0.278144	0.981945	-1.18163	0.600559	0.846316	-1.08325	0.535948	0.424309	-1.09923	0.274239	0.993609	-1.18327	0.073693	0.383882	-1.34585	0.538909	0.657089	-1.10475	0.563236	0.753171	-1.09234	0.569361	0.721361	-1.09082	0.903202	0.979981	-1.01985	0.923408	0.736096	-1.01476	0.992721	0.893176	1.00139	0.671386	0.662915	1.07108	0.629396	0.405354	1.07645	0.975284	0.421998	1.00502	0.0272696	0.745352	-1.42006
ssc-miR-425-5p_st	MIMAT0003393	0.963381	0.944005	-1.00484	0.909285	0.981945	-1.01206	0.807268	0.858953	-1.02601	0.0449258	0.15737	-1.24401	0.270664	0.993609	1.12421	0.702045	0.636229	-1.04367	0.619972	0.690037	1.05701	0.181363	0.626353	1.15345	0.896485	0.806576	1.01378	0.469175	0.978389	1.0845	0.0746772	0.464597	-1.21247	0.225631	0.716076	-1.13777	0.581677	0.662915	-1.06357	0.0031153	0.062306	-1.39852	0.0192325	0.0665742	-1.31493	0.945755	0.993819	-1.00718
ssc-miR-429_st	MIMAT0001537	0.24307	0.857255	-1.20137	0.368034	0.981945	-1.1512	0.109313	0.632141	-1.28951	0.517391	0.416691	-1.1062	0.926697	0.993609	1.0144	0.490626	0.588336	-1.1208	0.105644	0.522869	-1.31342	0.0915614	0.546715	1.30807	0.467228	0.669038	1.12014	0.911203	0.979981	-1.01855	0.327599	0.658343	1.16571	0.322121	0.744229	-1.16778	0.0893184	0.386066	-1.33233	0.460353	0.392268	-1.12213	0.301764	0.261142	1.18733	0.78379	0.993819	1.04358
ssc-miR-432-5p_st	MIMAT0002814	0.16176	0.768505	1.41794	0.727738	0.981945	1.08931	0.908346	0.871116	1.02867	0.1789	0.277465	-1.39799	0.918167	0.993609	1.02554	0.578193	0.601651	-1.1562	0.787465	0.726153	-1.07276	0.990118	0.859406	-1.00304	0.815569	0.801261	1.05895	0.70553	0.978389	-1.10351	0.146023	0.540707	-1.43807	0.80598	0.893176	1.06218	0.714193	0.662915	-1.10016	0.149309	0.222849	-1.4337	0.313274	0.265988	-1.30317	0.287378	0.993819	-1.30169
ssc-miR-4331_st	MIMAT0025464	0.0168792	0.582516	-2.02699	0.513646	0.981945	-1.20271	0.490896	0.792323	-1.21501	0.487782	0.406485	1.21672	0.672505	0.993609	1.1266	0.593353	0.601651	1.17335	0.971776	0.774679	-1.01062	0.269786	0.644344	1.36883	0.971183	0.806576	1.01022	0.53872	0.978389	1.20224	0.171787	0.572983	1.47833	0.285298	0.716076	-1.35497	0.664411	0.662915	-1.13857	0.784739	0.421925	1.08	0.490551	0.31804	1.22965	0.0713699	0.993819	1.68535
ssc-miR-4332_st	MIMAT0013803	0.174747	0.768505	1.41083	0.339113	0.981945	1.27192	0.313951	0.691969	1.28864	0.215265	0.307522	1.36816	0.922084	0.993609	1.02472	0.510271	0.588336	1.19125	0.344775	0.629755	1.28672	0.362082	0.699099	-1.25755	0.958284	0.806576	-1.01315	0.99551	0.979981	-1.00149	0.810564	0.728058	1.06171	0.389719	0.768721	1.24123	0.392871	0.60125	1.25568	0.252268	0.294437	1.33515	0.816831	0.397337	1.06329	0.67847	0.993819	-1.10922
ssc-miR-4334-3p_st	MIMAT0000584	0.404182	0.924695	1.09917	0.468958	0.981945	-1.08542	0.133595	0.632141	1.18803	0.0813994	0.196883	1.22325	0.0718879	0.993609	1.23182	0.14007	0.490266	1.1968	0.332169	0.629755	-1.12393	0.74829	0.840485	1.03685	0.0301963	0.357963	-1.28951	0.0208416	0.443071	-1.33527	0.795555	0.723232	1.02964	0.0143548	0.671601	-1.33704	0.0101294	0.307934	-1.38448	0.950625	0.465993	-1.007	0.0116757	0.0477644	1.37485	0.124685	0.993819	-1.19306
ssc-miR-4334-5p_st	ssc-miR-4334-5p_st	0.961129	0.944005	-1.01891	0.636606	0.981945	1.19951	0.859839	0.871116	1.07024	0.287574	0.327531	-1.51081	0.651511	0.993609	-1.18992	0.0767763	0.383882	-2.09783	0.611648	0.685511	1.23049	0.530671	0.741247	-1.27349	0.766852	0.791632	1.12079	0.732375	0.978389	1.14974	0.217102	0.602084	-1.61693	0.357999	0.768721	1.42732	0.3531	0.581526	1.46419	0.535754	0.401629	-1.26968	0.135545	0.205413	-1.85904	0.602448	0.993819	1.22219
ssc-miR-4337_st	ssc-miR-4337_st	0.0873124	0.724422	1.21428	0.15841	0.981945	1.17221	0.07928	0.632141	1.22085	0.811677	0.511816	1.02676	0.540389	0.993609	1.07039	0.297912	0.549486	1.13136	0.556213	0.657089	1.0718	0.240562	0.626353	-1.14056	0.713884	0.789682	-1.04149	0.272616	0.950953	-1.13906	0.125458	0.540707	-1.18904	0.414668	0.776022	1.09512	0.991097	0.724263	1.00131	0.707404	0.421074	-1.0425	0.715077	0.386218	-1.04387	0.750407	0.993819	-1.03589
ssc-miR-4338_st	ssc-miR-4338_st	0.483953	0.924695	1.09512	0.83883	0.981945	1.02665	0.319386	0.691969	-1.13861	0.766197	0.510798	-1.03922	0.994275	0.994275	1.00093	0.758649	0.64198	-1.04306	0.835491	0.737865	1.02889	0.315997	0.661389	1.13966	0.232835	0.504978	1.16895	0.253561	0.950953	1.1715	0.481687	0.676312	1.09564	0.844436	0.893176	1.0257	0.840772	0.688685	1.02794	0.760738	0.421925	-1.04018	0.626033	0.361173	-1.06924	0.618233	0.993819	-1.06669
ssc-miR-4339_st	MIMAT0014860	0.860199	0.937124	1.1016	0.661124	0.981945	1.27274	0.700473	0.858953	-1.23561	0.381195	0.365947	-1.62277	0.124425	0.993609	-2.36568	0.167916	0.507245	-2.26245	0.779606	0.726153	1.1772	0.242469	0.626353	-1.91459	0.412464	0.635725	1.57261	0.521574	0.978389	1.45456	0.620452	0.694212	-1.31334	0.0520108	0.716076	3.01091	0.0864345	0.386066	2.78488	0.49428	0.401629	1.4578	0.271472	0.246793	-1.91033	0.79274	0.993819	1.15536
ssc-miR-450b-5p_st	MIMAT0004909	0.610946	0.937124	-1.08766	0.849104	0.981945	-1.03186	0.817939	0.858953	-1.03869	0.784281	0.511816	-1.04618	0.501774	0.993609	1.11754	0.240234	0.532561	-1.23086	0.542991	0.657089	-1.11257	0.368969	0.699099	1.16077	0.96811	0.806576	1.00661	0.694643	0.978389	-1.07113	0.96521	0.760756	-1.00721	0.390229	0.768721	-1.15315	0.21869	0.503651	-1.24334	0.346654	0.346654	-1.16915	0.725151	0.388142	1.06346	0.749542	0.993819	1.05407
ssc-miR-451_st	MIMAT0001631	0.797977	0.937124	-1.07903	0.244675	0.981945	1.41837	0.23523	0.632141	-1.42871	0.879668	0.538572	-1.046	0.217797	0.993609	1.44884	0.659981	0.625472	1.14891	0.82352	0.737865	-1.07281	0.0194135	0.439106	2.06997	0.022912	0.357963	2.02643	0.366425	0.950953	1.33174	0.298218	0.658343	1.36588	0.942938	0.893176	-1.02149	0.168291	0.456789	-1.55434	0.168378	0.235675	-1.51549	0.935959	0.414957	1.02564	0.158849	0.993819	1.53046
ssc-miR-455_st	MIMAT0004784	0.165467	0.768505	1.22845	0.784441	0.981945	-1.04076	0.714619	0.858953	1.05488	0.597416	0.45088	1.08032	0.977341	0.994275	1.00415	0.137991	0.490266	1.26359	0.996031	0.778149	1.00077	0.735857	0.840485	-1.05052	0.523743	0.700607	-1.09787	0.733984	0.978389	-1.05407	0.870316	0.736096	1.02412	0.762744	0.893176	-1.04508	0.982604	0.721526	-1.00338	0.617141	0.405354	1.07585	0.62194	0.361127	1.07949	0.099943	0.993819	-1.27852
ssc-miR-484_st	MIMAT0003283	0.655772	0.937124	-1.13276	0.171695	0.981945	-1.47357	0.763154	0.858953	-1.08784	0.412038	0.371763	-1.25901	0.322787	0.993609	-1.32093	0.164121	0.507245	-1.52019	0.64828	0.705252	-1.1449	0.488572	0.729417	-1.21427	0.281731	0.526043	-1.35458	0.862976	0.979981	-1.05245	0.601517	0.69219	-1.15735	0.69568	0.893176	-1.11555	0.629771	0.662915	1.15376	0.863493	0.443112	1.04918	0.748527	0.39345	-1.09967	0.349698	0.993819	-1.30086
ssc-miR-486_st	MIMAT0002177	0.105673	0.724422	1.20377	0.702724	0.981945	-1.04377	0.432584	0.787303	1.09246	0.94666	0.559602	-1.00753	0.894715	0.993609	1.01495	0.463034	0.588336	-1.09161	0.163525	0.531457	1.18343	0.513017	0.740794	-1.07637	0.246962	0.505971	-1.14027	0.502751	0.978389	1.08327	0.395015	0.666377	-1.10069	0.60772	0.893176	-1.05937	0.202657	0.48131	1.166	0.842108	0.439057	-1.02259	0.146157	0.211888	-1.19234	0.0488248	0.923233	-1.25646
ssc-miR-487b_st	MIMAT0026614	0.762639	0.937124	1.03199	0.0499365	0.981945	1.23503	0.31966	0.691969	1.11023	0.438691	0.380256	1.08448	0.201349	0.993609	1.14453	0.463637	0.588336	-1.08477	0.48282	0.657089	-1.081	0.770444	0.840485	1.03089	0.31081	0.555491	1.11241	0.106391	0.894707	-1.20015	0.821902	0.728058	-1.02374	0.467153	0.818399	1.07907	0.061544	0.334096	-1.23723	0.605829	0.405354	-1.05537	0.157275	0.211888	1.17232	0.0924497	0.993819	1.19674
ssc-miR-490_st	MIMAT0004764	0.698013	0.937124	1.0545	0.996891	0.999331	-1.00053	0.259464	0.632141	-1.16848	0.131015	0.246204	-1.23407	0.364536	0.993609	-1.13284	0.387424	0.57914	-1.1343	0.0579571	0.470901	-1.32746	0.820661	0.857757	1.03146	0.261061	0.50998	1.16786	0.38173	0.950953	-1.13605	0.689704	0.711715	-1.05613	0.366558	0.768721	1.13224	0.278636	0.550035	-1.1718	0.532283	0.401629	-1.08936	0.61539	0.359643	1.07567	0.695143	0.993819	-1.05506
ssc-miR-491_st	MIMAT0002807	0.673326	0.937124	1.0504	0.960448	0.981945	-1.00579	0.0492039	0.632141	1.26711	0.290202	0.327531	-1.13241	0.438487	0.993609	-1.09492	0.0584329	0.383882	-1.27253	0.738299	0.726153	-1.04217	0.00812296	0.303077	-1.38738	0.0442518	0.357963	-1.27445	0.0305639	0.520123	-1.32055	0.00391009	0.0893735	-1.43488	0.467924	0.818399	1.08862	0.689745	0.662915	1.05061	0.772692	0.421925	-1.03424	0.503036	0.318117	-1.08658	0.637691	0.993819	-1.05648
ssc-miR-494_st	MIMAT0026607	0.927873	0.944005	-1.00928	0.486208	0.981945	1.07399	0.813865	0.858953	1.02434	0.607492	0.455619	1.05396	0.340781	0.993609	1.10296	0.0119335	0.311319	1.33298	0.106301	0.522869	1.19577	0.470762	0.72425	1.07675	0.643491	0.766713	1.04847	0.159892	0.91338	1.16736	0.780194	0.723232	1.02892	0.794394	0.893176	-1.02698	0.457632	0.625694	1.08415	0.656733	0.410458	-1.04649	0.248964	0.239753	-1.13455	0.432086	0.993819	1.08396
ssc-miR-497_st	MIMAT0002820	0.691712	0.937124	1.04949	0.75666	0.981945	1.03845	0.781723	0.858953	1.0343	0.0293601	0.140929	1.31788	0.348082	0.993609	-1.12188	0.0154138	0.319286	1.38921	0.281555	0.629755	-1.15064	0.227216	0.626353	-1.16036	0.97378	0.806576	1.00401	0.183916	0.938939	-1.19011	0.0536799	0.454822	1.27417	0.215268	0.716076	1.16501	0.844508	0.688685	-1.02564	0.00291166	0.062306	1.4785	0.00281911	0.0294764	1.5164	0.930725	0.993819	-1.01063
ssc-miR-499-3p_st	MIMAT0004772	0.805145	0.937124	-1.06237	0.660211	0.981945	1.11398	0.485194	0.79005	-1.18743	0.224837	0.317416	-1.35156	0.462723	0.993609	-1.19822	0.107461	0.458289	1.53394	0.269507	0.629755	-1.33651	0.970586	0.857757	-1.00908	0.258927	0.50998	1.32277	0.649753	0.978389	-1.12555	0.598236	0.69219	-1.13822	0.244182	0.716076	1.33478	0.674845	0.662915	-1.11542	0.623917	0.405354	-1.12798	0.965644	0.421998	-1.01126	0.493695	0.993819	1.18346
ssc-miR-499-5p_st	MIMAT0002870	0.82495	0.937124	-1.07455	0.874877	0.981945	-1.05251	0.160807	0.632141	-1.58938	0.29011	0.327531	-1.41483	0.883223	0.993609	-1.04889	0.877876	0.66443	1.0544	0.393686	0.649754	-1.34417	0.206981	0.626353	1.5153	0.210666	0.504978	1.51009	0.627501	0.978389	1.18243	0.720612	0.711715	1.12337	0.991552	0.893176	-1.00345	0.473626	0.625694	-1.28151	0.360428	0.34676	-1.34888	0.881842	0.401708	-1.05257	0.949151	0.993819	1.02094
ssc-miR-500_st	MIMAT0002871	0.281917	0.874739	1.56861	0.228306	0.981945	1.65749	0.573108	0.833939	-1.26374	0.327461	0.347746	-1.50532	0.58874	0.993609	-1.25176	0.236126	0.532561	-1.69357	0.948721	0.774679	-1.02867	0.981655	0.857757	1.00957	0.0819918	0.445551	2.09464	0.64014	0.978389	1.22853	0.673318	0.711715	-1.19116	0.0858107	0.716076	2.07478	0.655642	0.662915	1.21688	0.656693	0.410458	-1.20257	0.389221	0.299401	-1.46337	0.894189	0.993819	1.05666
ssc-miR-503_st	MIMAT0003188	0.957712	0.944005	-1.0192	0.848867	0.981945	-1.07076	0.117459	0.632141	-1.77418	0.0692039	0.191025	-1.95491	0.946005	0.993609	-1.02459	0.590369	0.601651	-1.22788	0.214994	0.582275	-1.61269	0.133171	0.626353	1.7316	0.166012	0.464834	1.65693	0.802025	0.979981	1.10014	0.786935	0.723232	-1.10187	0.902202	0.893176	-1.04506	0.238631	0.510871	-1.57399	0.0793271	0.168407	-1.90799	0.613725	0.359643	-1.2122	0.890576	0.993819	-1.05059
ssc-miR-504_st	MIMAT0002875	0.258839	0.866452	1.72238	0.888621	0.981945	1.069	0.869438	0.871116	-1.08146	0.164372	0.274006	-1.96077	0.0824616	0.993609	-2.33671	0.311563	0.549486	-1.67487	0.994282	0.778149	-1.00363	0.113367	0.618366	-2.16069	0.760942	0.791632	1.15608	0.882489	0.979981	1.07756	0.21753	0.602084	-1.81307	0.0620942	0.716076	2.49794	0.102034	0.39767	2.32826	0.713014	0.421902	1.19173	0.191393	0.232776	-1.95368	0.320705	0.993819	-1.61121
ssc-miR-505_st	MIMAT0002876	0.236759	0.853657	1.25914	0.723199	0.981945	-1.07062	0.231839	0.632141	-1.26228	0.243329	0.327531	-1.25502	0.653918	0.993609	-1.09028	0.454961	0.588336	-1.16561	0.0807369	0.522869	1.44181	0.448782	0.72425	1.15776	0.395082	0.635134	1.17902	0.0059894	0.407699	1.81997	0.976092	0.76277	1.00578	0.924698	0.893176	1.01836	0.0330609	0.317509	1.57197	0.466678	0.392268	-1.15111	0.00643094	0.036174	-1.80951	0.128118	0.993819	-1.34806
ssc-miR-532-3p_st	MIMAT0004780	0.0294589	0.582516	2.17463	0.465111	0.981945	1.28582	0.501984	0.799079	1.25973	0.182665	0.277465	-1.58963	0.498419	0.993609	-1.26218	0.683636	0.629967	-1.15985	0.777248	0.726153	1.10835	0.182444	0.626353	-1.59001	0.952295	0.806576	1.02071	0.724894	0.978389	-1.13658	0.0498463	0.454822	-2.0025	0.164422	0.716076	1.62294	0.358996	0.581526	1.39894	0.502428	0.401629	-1.25943	0.12653	0.203351	-1.76187	0.13246	0.993819	-1.69125
ssc-miR-532-5p_st	MIMAT0002888	0.985333	0.944005	-1.00297	0.387526	0.981945	-1.1505	0.361815	0.728236	-1.15959	0.923322	0.553993	-1.01564	0.26669	0.993609	-1.19837	0.431945	0.588336	-1.14464	0.968025	0.774679	-1.00688	0.838379	0.857757	-1.03344	0.961108	0.806576	1.00789	0.411618	0.950953	1.15166	0.413665	0.666377	1.14173	0.800525	0.893176	1.0416	0.312798	0.581526	1.19018	0.309067	0.325334	1.17991	0.959592	0.421998	-1.0087	0.397516	0.993819	-1.1471
ssc-miR-542-3p_st	MIMAT0003172	0.1202	0.741859	1.22881	0.135031	0.981945	1.2188	0.0736332	0.632141	1.26973	0.148039	0.261246	1.21079	0.242709	0.993609	1.16593	0.469527	0.588336	1.10527	0.94723	0.774679	-1.00916	0.51302	0.740794	-1.08902	0.752848	0.791632	-1.04179	0.0796185	0.774869	-1.28136	0.714737	0.711715	-1.04868	0.733081	0.893176	1.04534	0.243256	0.513541	-1.17662	0.771515	0.421925	1.03847	0.152893	0.211888	1.22188	0.949788	0.993819	-1.00821
ssc-miR-542-5p_st	MIMAT0003171	0.0550255	0.679221	2.20229	0.871623	0.981945	1.06657	0.973081	0.883711	1.01355	0.189416	0.283107	-1.70062	0.806146	0.993609	-1.10286	0.287162	0.549486	-1.5754	0.339875	0.629755	-1.50198	0.780178	0.84091	-1.1178	0.898252	0.806576	1.05232	0.324389	0.950953	-1.52233	0.17876	0.583708	-1.72366	0.684309	0.893176	1.17628	0.467188	0.625694	-1.3619	0.282144	0.307457	-1.54202	0.769169	0.394877	-1.13225	0.0766668	0.993819	-2.06483
ssc-miR-545_st	MIMAT0003165	0.662984	0.937124	-1.04532	0.31648	0.981945	-1.10802	0.104273	0.632141	1.18375	0.859572	0.532609	1.01813	0.889731	0.993609	1.01418	0.930732	0.670108	-1.00941	0.42771	0.657089	-1.08966	0.135153	0.626353	-1.1672	0.0114484	0.323489	-1.31161	0.0236799	0.443071	-1.28988	0.144884	0.540707	-1.16267	0.255779	0.716076	-1.12373	0.356822	0.581526	-1.10511	0.969449	0.472902	1.0039	0.338694	0.277114	1.10942	0.567195	0.993819	-1.05999
ssc-miR-574_st	MIMAT0003239	0.0430731	0.607638	1.38267	0.322972	0.981945	1.16665	0.608897	0.846316	1.08254	0.0861093	0.196883	1.31284	0.944342	0.993609	-1.01086	0.733762	0.637911	1.05744	0.514808	0.657089	1.1132	0.561282	0.753171	-1.09429	0.629205	0.766713	1.0777	0.864841	0.979981	1.02832	0.218256	0.602084	1.21274	0.290804	0.716076	1.17931	0.473733	0.625694	1.12528	0.0749267	0.168407	1.32709	0.318715	0.268078	1.17934	0.276831	0.993819	-1.18517
ssc-miR-615_st	MIMAT0003283	0.841629	0.937124	-1.02904	0.457957	0.981945	-1.11271	0.149753	0.632141	-1.23364	0.119051	0.230421	-1.25597	0.464766	0.993609	-1.1109	0.535483	0.592711	-1.09904	0.885492	0.759754	1.02212	0.466359	0.72425	1.11048	0.47324	0.669038	1.10868	0.134289	0.894707	1.26093	0.900303	0.736096	-1.01811	0.990946	0.893176	-1.00163	0.405695	0.604511	1.13548	0.394358	0.358507	-1.13059	0.107717	0.179603	-1.28376	0.58614	0.993819	-1.08131
ssc-miR-628_st	MIMAT0004809	0.0261851	0.582516	2.21111	0.014805	0.981945	2.40443	0.862935	0.871116	-1.06085	0.818905	0.511816	1.08151	0.130553	0.993609	1.69443	0.89443	0.670108	1.04933	0.1094	0.522869	1.81059	0.0941564	0.546715	1.79754	0.00975389	0.323489	2.55074	0.0796837	0.774869	1.92077	0.688279	0.711715	1.14732	0.310492	0.726329	1.41902	0.85503	0.688685	1.06856	0.195658	0.257445	-1.56673	0.162447	0.211888	-1.67414	0.806523	0.993819	1.08744
ssc-miR-652_st	MIMAT0022709	0.671139	0.937124	1.20932	0.526659	0.981945	1.32834	0.785297	0.858953	-1.12957	0.169382	0.275696	-1.86662	0.36248	0.993609	-1.50664	0.140894	0.490266	-2.03608	0.0099856	0.332444	-3.64419	0.520725	0.740794	-1.33382	0.367253	0.610877	1.50046	0.0184797	0.443071	-3.22618	0.266097	0.635529	-1.6525	0.127997	0.716076	2.00134	0.0700285	0.343365	-2.41875	0.632352	0.405354	-1.23893	0.165046	0.212202	1.9523	0.833704	0.993819	1.09842
ssc-miR-664-3p_st	MIMAT0022272	0.888148	0.94306	1.0168	0.5331	0.981945	1.07686	0.153557	0.632141	-1.1876	0.372576	0.363489	-1.11215	0.19687	0.993609	-1.16765	0.275759	0.549486	-1.14829	0.739882	0.726153	1.04262	0.886236	0.857757	1.01709	0.0447454	0.357963	1.27888	0.0965659	0.894707	1.23822	0.580349	0.69219	1.06784	0.0605247	0.716076	1.25739	0.124717	0.428306	1.21742	0.681346	0.415334	1.0499	0.243951	0.239753	-1.15956	0.628597	0.993819	1.05907
ssc-miR-664-5p_st	MIMAT0005948	0.697143	0.937124	1.06103	0.65695	0.981945	-1.06997	0.364118	0.728236	1.14905	0.509968	0.416691	-1.10576	0.184656	0.993609	-1.22716	0.223004	0.531943	-1.22016	0.655892	0.705252	1.07462	0.0299286	0.452083	-1.41007	0.180811	0.482164	-1.22945	0.67837	0.978389	-1.06926	0.122683	0.540707	-1.27058	0.370493	0.768721	1.14691	0.0938694	0.386066	1.31874	0.494913	0.401629	1.10979	0.289283	0.254912	-1.18828	0.406709	0.993819	-1.13527
ssc-miR-676-3p_st	MIMAT0018204	0.613905	0.937124	1.29126	0.306759	0.981945	1.68424	0.409706	0.771904	-1.52075	0.0821089	0.196883	-2.46431	0.994007	0.994275	1.0038	0.818372	0.648107	-1.13111	0.867938	0.750213	-1.09328	0.405525	0.72425	1.52654	0.0704346	0.445551	2.56131	0.539562	0.978389	1.391	0.343367	0.661912	-1.62045	0.310235	0.726329	1.67786	0.862373	0.689446	-1.09744	0.0808917	0.168407	-2.47369	0.136921	0.205413	-2.25404	0.600057	0.993819	1.30434
ssc-miR-7_st	MIMAT0000252	0.715146	0.937124	-1.10727	0.619354	0.981945	1.14893	0.116947	0.632141	-1.56275	0.0561564	0.16436	-1.73232	0.954861	0.993609	-1.01591	0.200287	0.509502	-1.46837	0.732587	0.726153	-1.10647	0.129922	0.626353	1.53828	0.0427359	0.357963	1.79549	0.248439	0.950953	1.41238	0.712168	0.711715	-1.1085	0.580279	0.893176	1.16721	0.773	0.675265	-1.08914	0.0631592	0.168407	-1.70519	0.136942	0.205413	-1.56563	0.390999	0.993819	1.27217
ssc-miR-708-5p_st	MIMAT0004828	0.237727	0.853657	1.55684	0.78838	0.981945	-1.10463	0.0638974	0.632141	-2.02772	0.143467	0.260337	-1.73673	0.967288	0.993609	-1.01531	0.257396	0.540904	-1.56823	0.51738	0.657089	-1.29087	0.0694892	0.483603	1.99714	0.10874	0.445551	1.83566	0.255691	0.950953	1.57082	0.676324	0.711715	1.16755	0.820059	0.893176	-1.08797	0.542452	0.659622	-1.2714	0.154418	0.227086	-1.71054	0.452432	0.306157	-1.3454	0.150484	0.993819	-1.71973
ssc-miR-744_st	MIMAT0004187	0.485726	0.924695	1.19324	0.964407	0.981945	1.01133	0.667399	0.858953	-1.11475	0.0955287	0.198944	-1.53848	0.37892	0.993609	-1.25049	0.255822	0.540904	-1.36008	0.712725	0.726153	-1.10371	0.649477	0.812965	-1.12177	0.635418	0.766713	1.12737	0.970361	0.979981	1.01	0.207893	0.602084	-1.38011	0.355693	0.768721	1.26466	0.641539	0.662915	1.13299	0.414191	0.370424	-1.2303	0.22061	0.239753	-1.39391	0.51375	0.993819	-1.17988
ssc-miR-769-3p_st	MIMAT0003887	0.167172	0.768505	1.71343	0.896197	0.981945	1.05132	0.164816	0.632141	-1.71875	0.433776	0.380256	-1.35229	0.872965	0.993609	-1.06326	0.146236	0.490266	-1.82543	0.940957	0.774679	1.03059	0.216475	0.626353	1.61649	0.130338	0.445551	1.80697	0.166761	0.91338	1.77134	0.533191	0.69219	1.271	0.771658	0.893176	1.11783	0.822169	0.686798	1.09579	0.532089	0.401629	-1.27183	0.417162	0.306157	-1.39366	0.20894	0.993819	-1.62978
ssc-miR-769-5p_st	MIMAT0003886	0.913504	0.944005	1.03713	0.316725	0.981945	-1.40338	0.425601	0.783105	-1.30844	0.288256	0.327531	-1.43308	0.93248	0.993609	-1.02884	0.983349	0.694456	-1.00746	0.134777	0.526059	-1.72044	0.475705	0.725651	1.27176	0.834731	0.806576	-1.07256	0.444146	0.978389	-1.31488	0.786429	0.723232	-1.09526	0.358392	0.768721	-1.36404	0.15566	0.438153	-1.67221	0.327367	0.334048	-1.3929	0.608468	0.359643	1.20052	0.26837	0.993819	-1.45549
ssc-miR-885-3p_st	MIMAT0004948	0.994193	0.944005	-1.00137	0.906435	0.981945	-1.02243	0.943623	0.881795	-1.01343	0.0716344	0.191025	-1.4183	0.219539	0.993609	-1.26447	0.315019	0.549486	-1.22485	0.723268	0.726153	1.07352	0.246236	0.626353	-1.24771	0.962649	0.806576	-1.00888	0.674109	0.978389	1.08794	0.0825477	0.465133	-1.3995	0.265186	0.716076	1.23673	0.13412	0.428306	1.35744	0.544167	0.401629	-1.12165	0.0425624	0.0957654	-1.52258	0.912202	0.993819	-1.02103
ssc-miR-885-5p_st	MIMAT0004947	0.326488	0.895574	1.34452	0.352817	0.981945	1.32325	0.765242	0.858953	1.09355	0.934897	0.555385	1.02475	0.625772	0.993609	1.15747	0.789877	0.64198	1.08831	0.180706	0.566587	1.5394	0.849481	0.857757	1.05845	0.525455	0.700607	1.21005	0.285962	0.950953	1.40771	0.828166	0.728058	-1.06714	0.65521	0.893176	1.14322	0.372206	0.58325	1.32997	0.684441	0.415334	-1.12952	0.205943	0.239753	-1.50222	0.957501	0.993819	-1.01608
ssc-miR-92a_st	MIMAT0000092	0.236036	0.853657	1.13627	0.727167	0.981945	1.03791	0.956396	0.881795	-1.00584	0.510963	0.416691	-1.07281	0.241491	0.993609	1.13455	0.504907	0.588336	-1.07856	0.440596	0.657089	1.09153	0.220954	0.626353	1.14118	0.686669	0.789682	1.04397	0.411125	0.950953	1.0979	0.546369	0.69219	-1.06658	0.406059	0.770059	-1.09311	0.732509	0.662915	-1.03942	0.072693	0.168407	-1.21716	0.16918	0.214454	-1.17101	0.398237	0.993819	-1.09477
ssc-miR-92b-3p_st	MIMAT0003218	0.542855	0.937124	1.16754	0.560446	0.981945	1.1597	0.415318	0.771904	1.23106	0.743537	0.506957	-1.08665	0.211225	0.993609	1.37919	0.929594	0.670108	-1.02407	0.0777223	0.522869	1.62836	0.654888	0.812965	1.12033	0.814055	0.801261	-1.06153	0.303076	0.950953	1.32273	0.256715	0.635529	-1.33773	0.496267	0.825601	-1.18926	0.538517	0.659622	1.18067	0.118375	0.201473	-1.4987	0.0407853	0.0957654	-1.76946	0.978811	0.993819	-1.00676
ssc-miR-92b-5p_st	MIMAT0017278	0.594013	0.937124	-1.22824	0.744494	0.981945	1.13372	0.201751	0.632141	-1.64545	0.626872	0.456389	-1.20613	0.171967	0.993609	-1.70564	0.969232	0.692309	1.01587	0.790948	0.726153	1.11432	0.925615	0.857757	-1.03658	0.112686	0.445551	1.86549	0.144583	0.894707	1.83355	0.422056	0.666377	1.36424	0.0942215	0.716076	1.93372	0.123051	0.428306	1.90062	0.371033	0.34676	1.41414	0.470723	0.311508	-1.34401	0.39244	0.993819	1.39248
ssc-miR-935_st	MIMAT0004978	0.0061703	0.582516	1.66979	0.108803	0.981945	1.33327	0.65007	0.858953	1.08302	0.956912	0.560143	1.00953	0.626953	0.993609	1.08922	0.121717	0.490266	1.34176	0.0789179	0.522869	1.39899	0.974045	0.857757	1.00573	0.24163	0.504978	1.23107	0.175698	0.919986	1.29175	0.689242	0.711715	-1.0728	0.254508	0.716076	1.22406	0.185236	0.474906	1.2844	0.66554	0.413379	-1.07894	0.0873058	0.154069	-1.38579	0.205789	0.993819	-1.25241
ssc-miR-95_st	MIMAT0000094	0.312862	0.882717	1.39977	0.0931142	0.981945	1.76514	0.341164	0.728236	-1.37285	0.335137	0.349709	-1.37841	0.83069	0.993609	-1.07322	0.41244	0.586311	-1.33487	0.937956	0.774679	-1.02765	0.458184	0.72425	1.27918	0.0112405	0.323489	2.42327	0.411196	0.950953	1.33591	0.990243	0.766295	-1.00405	0.0605656	0.716076	1.89439	0.901468	0.701257	1.04434	0.45091	0.392268	-1.28436	0.404776	0.306133	-1.34132	0.484476	0.993819	1.26102
ssc-miR-98_st	MIMAT0000096	0.82345	0.937124	1.03641	0.294137	0.981945	1.18493	0.457542	0.787303	-1.12705	0.887038	0.540328	-1.02303	0.434548	0.993609	-1.13413	0.272401	0.549486	-1.20739	0.454875	0.657089	1.13612	0.968808	0.857757	-1.00629	0.0786874	0.445551	1.33548	0.152859	0.91338	1.28046	0.546875	0.69219	1.10168	0.0727399	0.716076	1.34387	0.143065	0.428306	1.28851	0.521412	0.401629	1.1086	0.379382	0.294348	-1.16228	0.40606	0.993819	1.1433
ssc-miR-99a_st	MIMAT0000097	0.436271	0.924695	1.06492	0.761511	0.981945	-1.02471	0.248576	0.632141	1.09834	0.652824	0.471921	-1.03688	0.877091	0.993609	1.01251	0.650732	0.624875	1.03942	0.321044	0.629755	1.08906	0.315559	0.661389	-1.08477	0.148517	0.445551	-1.12548	0.920707	0.979981	-1.00852	0.113333	0.53333	-1.13885	0.647232	0.893176	-1.03754	0.395559	0.60125	1.0756	0.546216	0.401629	-1.04986	0.160955	0.211888	-1.12923	0.282088	0.993819	-1.09124
ssc-miR-99b_st	MIMAT0000132	0.304244	0.874739	1.15618	0.972503	0.981945	1.00484	0.22608	0.632141	1.18719	0.181565	0.277465	1.20911	0.237495	0.993609	-1.18216	0.644781	0.623288	1.07099	0.135966	0.526059	1.25309	0.0207509	0.439106	-1.40344	0.239087	0.504978	-1.18147	0.716262	0.978389	1.05552	0.896036	0.736096	1.01846	0.224553	0.716076	1.18788	0.0121698	0.308301	1.48136	0.0152692	0.0848292	1.42936	0.809918	0.397337	-1.03638	0.320327	0.993819	-1.15061
[truncated: 39 more columns]

## Sheet: pig rel LSN
All comparisons are relative to Lean Saline Perfused		Lean EX-4 Perfused			Lean EX-4 Ischemic			Obese EX-4 Perfused			Obese EX-4 Ischemic			Lean Saline Ischemic			Obese Saline Perfused			Obese Saline Ischemic
Probeset ID	Accession ID for Homolog entered into IPA	p-value	FDR	Fold-Change	p-value	FDR	Fold-Change	p-value	FDR	Fold-Change	p-value	FDR	Fold-Change	p-value	FDR	Fold-Change	p-value	FDR	Fold-Change	p-value	FDR	Fold-Change	Sequence Length	Sequence Type	Sequence
ssc-let-7a_st	MIMAT0000062	0.989231	0.944005	1.00072	0.582681	0.981945	1.02988	0.517214	0.799079	-1.03535	0.0207716	0.140929	-1.13812	0.874064	0.993609	1.00851	0.907213	0.670108	1.00663	0.910731	0.774679	1.00638	22	miRNA	UGAGGUAGUAGGUUGUAUAGUU
ssc-let-7c_st	MIMAT0000064	0.319474	0.888679	1.06688	0.480883	0.981945	1.0467	0.391081	0.749571	-1.05723	0.324008	0.347746	-1.06623	0.468146	0.993609	-1.04811	0.849626	0.661684	-1.01306	0.804153	0.734128	1.01711	22	miRNA	UGAGGUAGUAGGUUGUAUGGUU
ssc-let-7e_st	MIMAT0000066	0.584538	0.937124	1.04105	0.823837	0.981945	1.01648	0.142654	0.632141	-1.11579	0.968119	0.563045	1.00294	0.132872	0.993609	-1.11899	0.628289	0.615554	-1.03848	0.455543	0.657089	-1.06009	22	miRNA	UGAGGUAGGAGGUUGUAUAGUU
ssc-let-7f_st	MIMAT0000067	0.607375	0.937124	-1.10203	0.686463	0.981945	1.07925	0.261102	0.632141	-1.239	0.0286595	0.140929	-1.53742	0.944987	0.993609	-1.0131	0.933529	0.670108	1.01683	0.984174	0.776351	-1.00398	22	miRNA	UGAGGUAGUAGAUUGUAUAGUU
ssc-let-7g_st	MIMAT0000121	0.480626	0.924695	-1.11986	0.564374	0.981945	1.09678	0.209353	0.632141	-1.22549	0.0288187	0.140929	-1.43902	0.750256	0.993609	-1.05224	0.875624	0.66443	-1.02689	0.705188	0.725273	-1.06632	22	miRNA	UGAGGUAGUAGUUUGUACAGUU
ssc-let-7i_st	MIMAT0000122	0.496292	0.924695	1.29816	0.465107	0.981945	1.32359	0.483573	0.79005	-1.30836	0.0168284	0.140929	-2.60963	0.774788	0.993609	1.1156	0.930655	0.670108	-1.0359	0.829851	0.737865	1.09102	19	miRNA	UGAGGUAGUAGUUUGUGCU
ssc-miR-1_st	MIMAT0000123	0.57705	0.937124	-1.17609	0.920278	0.981945	1.02946	0.184815	0.632141	-1.47762	0.41003	0.371763	-1.27169	0.942204	0.993609	-1.02125	0.774625	0.64198	-1.09216	0.293912	0.629755	-1.38533	21	miRNA	UGGAAUGUAAAGAAGUAUGUA
ssc-miR-100_st	MIMAT0000098	0.606488	0.937124	1.02621	0.847254	0.981945	1.0097	0.284096	0.661731	1.0557	0.623989	0.456389	-1.02492	0.952458	0.993609	1.00299	0.483746	0.588336	1.03808	0.0150123	0.332444	1.14568	22	miRNA	AACCCGUAGAUCCGAACUUGUG
ssc-miR-101_st	MIMAT0000099	0.254331	0.866452	-1.15895	0.322018	0.981945	-1.13634	0.519568	0.799079	-1.08623	0.407556	0.371763	-1.11251	0.842731	0.993609	-1.02573	0.728032	0.637911	1.04839	0.567884	0.657089	-1.08086	21	miRNA	UACAGUACUGUGAUAACUGAA
ssc-miR-103_st	MIMAT0000101	0.667227	0.937124	-1.03333	0.72959	0.981945	1.0267	0.740522	0.858953	1.02556	0.28925	0.327531	1.08487	0.316066	0.993609	-1.08003	0.655545	0.625356	-1.03674	0.200642	0.574688	-1.11048	23	miRNA	AGCAGCAUUGUACAGGGCUAUGA
ssc-miR-105-1_st	MIMAT0000102	0.870657	0.937124	1.01416	0.855276	0.981945	1.01588	0.856588	0.871116	1.01573	0.571445	0.444503	-1.05023	0.4792	0.993609	-1.06329	0.0304765	0.383882	1.22915	0.820565	0.737865	-1.021	20	miRNA	UCAAAUGCUCAGACUCCUGU
ssc-miR-106a_st	MIMAT0000103	0.447235	0.924695	-1.06601	0.892771	0.981945	-1.01135	0.180161	0.632141	-1.12064	0.0398633	0.156598	-1.19523	0.463771	0.993609	1.06354	0.0663669	0.383882	-1.18262	0.208656	0.574688	-1.11977	24	miRNA	AAAAGUGCUUACAGUGCAGGUAGC
ssc-miR-107_st	MIMAT0000104	0.661396	0.937124	1.02673	0.746196	0.981945	1.01967	0.0801147	0.632141	1.11406	0.0802658	0.196883	1.114	0.892041	0.993609	-1.0082	0.853344	0.661684	1.01186	0.506535	0.657089	-1.04344	23	miRNA	AGCAGCAUUGUACAGGGCUAUCA
ssc-miR-10a_st	MIMAT0000253	0.0390713	0.593583	-1.40963	0.62639	0.981945	1.0814	0.265475	0.634382	-1.19787	0.0902378	0.196883	-1.32119	0.948178	0.993609	1.01048	0.205268	0.51317	-1.24422	0.160336	0.531457	-1.275	22	miRNA	UACCCUGUAGAUCCGAAUUUGU
ssc-miR-10b_st	MIMAT0000208	0.373403	0.924695	-1.40849	0.946061	0.981945	1.0262	0.0654715	0.632141	-2.06421	0.280451	0.327531	-1.51685	0.370824	0.993609	1.41114	0.427461	0.588336	-1.38186	0.563602	0.657089	1.26464	22	miRNA	UACCCUGUAGAACCGAAUUUGU
ssc-miR-122_st	MIMAT0000246	0.575495	0.937124	-1.17819	0.520121	0.981945	1.20743	0.0646099	0.632141	-1.74307	0.00688798	0.10332	-2.31744	0.404737	0.993609	-1.27733	0.076134	0.383882	-1.75826	0.69006	0.721794	-1.13167	23	miRNA	UGGAGUGUGACAAUGGUGUUUGU
ssc-miR-124a_st	MIMAT0000134	0.831553	0.937124	-1.03235	0.831833	0.981945	-1.03229	0.801091	0.858953	-1.03843	0.754345	0.508547	-1.04797	0.419461	0.993609	-1.12914	0.49761	0.588336	-1.1141	0.55641	0.657089	1.09813	21	miRNA	UAAGGCACGCGGUGAAUGCCA
ssc-miR-125a_st	MIMAT0000135	0.0337622	0.582516	1.3291	0.187075	0.981945	1.18845	0.0395799	0.632141	1.31676	0.269789	0.327531	1.15463	0.11736	0.993609	1.22898	0.14877	0.490266	1.22264	0.032864	0.395727	1.35449	23	miRNA	UCCCUGAGACCCUUUAACCUGUG
ssc-miR-125b_st	MIMAT0000136	0.670446	0.937124	1.01624	0.757098	0.981945	-1.01177	0.224602	0.632141	1.04756	0.364045	0.361037	-1.03514	0.160528	0.993609	1.0554	0.321131	0.549486	-1.04091	0.323021	0.629755	1.04075	22	miRNA	UCCCUGAGACCCUAACUUGUGA
ssc-miR-126_st	MIMAT0000138	0.50214	0.926847	1.05327	0.52757	0.981945	1.05004	0.873237	0.871116	-1.01237	0.0213888	0.140929	-1.20383	0.516493	0.993609	1.05144	0.146258	0.490266	-1.12848	0.156372	0.531457	-1.12504	22	miRNA	UCGUACCGUGAGUAAUAAUGCG
ssc-miR-127_st	MIMAT0000139	0.900825	0.944005	1.06082	0.884818	0.981945	-1.07104	0.12082	0.632141	-2.11713	0.0167882	0.140929	-3.28622	0.163329	0.993609	-1.95678	0.0124332	0.311319	-3.76282	0.119761	0.523723	-2.22093	22	miRNA	UCGGAUCCGUCUGAGCUUGGCU
ssc-miR-1277_st	MIMAT0005933	0.482198	0.924695	-1.06418	0.676631	0.981945	1.0375	0.284113	0.661731	1.10003	0.448335	0.380256	-1.06946	0.889475	0.993609	1.01233	0.586004	0.601651	1.05237	0.0278546	0.395727	1.239	22	miRNA	UACGUAGAUAUAUAUGUAUUUU
ssc-miR-128_st	MIMAT0000140	0.528964	0.937124	1.06816	0.938608	0.981945	-1.00807	0.914958	0.871116	1.01121	0.173555	0.275696	-1.15523	0.520055	0.993609	-1.0697	0.734698	0.637911	-1.03827	0.66502	0.705252	1.04918	21	miRNA	UCACAGUGAACCGGUCUCUUU
ssc-miR-1285_st	MIMAT0005876	0.572527	0.937124	-1.09588	0.521135	0.981945	-1.1098	0.314019	0.691969	-1.17859	0.934667	0.555385	-1.01335	0.549887	0.993609	-1.10191	0.572902	0.601651	1.10188	0.258714	0.629755	1.21646	24	miRNA	CUGGGCAACAUAGCGAGACCCCGU
ssc-miR-129a_st	MIMAT0000544	0.188008	0.774772	-1.2285	0.0114809	0.981945	-1.50885	0.0591696	0.632141	-1.34935	0.0332979	0.142705	-1.4061	0.0808489	0.993609	-1.31783	0.0225359	0.383882	-1.47654	0.192941	0.574688	-1.24084	22	miRNA	AAGCCCUUACCCCAAAAAGCAU
ssc-miR-1306-3p_st	MIMAT0009411	0.162581	0.768505	1.3313	0.660229	0.981945	1.0928	0.654653	0.858953	1.09451	0.311027	0.342415	-1.22871	0.573274	0.993609	1.12056	0.433337	0.588336	-1.18337	0.305632	0.629755	1.24727	21	miRNA	ACGUUGGCUCUGGUGGUGAUG
ssc-miR-1306-5p_st	MIMAT0022726	0.819646	0.937124	1.03354	0.970874	0.981945	-1.0053	0.677681	0.858953	1.06205	0.894332	0.542019	1.0194	0.293907	0.993609	1.1656	0.985638	0.694456	1.00277	0.580526	0.664334	-1.08871	22	miRNA	CCACCUCCCCUGCAAACGUCCA
ssc-miR-1307_st	MIMAT0005951	0.770309	0.937124	1.05817	0.130364	0.981945	-1.34782	0.980875	0.883711	-1.00465	0.191097	0.283107	-1.29265	0.181884	0.993609	-1.2999	0.0460479	0.383882	-1.52752	0.39585	0.649754	-1.19166	22	miRNA	ACUCGGCGUGGCGUCGGUCGUG
ssc-miR-130a_st	MIMAT0000141	0.717832	0.937124	1.0671	0.906117	0.981945	1.0214	0.716015	0.858953	1.06757	0.0709753	0.191025	-1.39557	0.98705	0.994275	-1.00292	0.223783	0.531943	1.26437	0.769041	0.726153	1.05755	22	miRNA	CAGUGCAAUGUUAAAAGGGCAU
ssc-miR-130b_st	MIMAT0000387	0.602332	0.937124	-1.0711	0.885079	0.981945	1.01919	0.826275	0.858953	-1.0293	0.115485	0.227187	-1.23543	0.145235	0.993609	-1.21537	0.010244	0.311319	-1.4609	0.0963199	0.522869	-1.26808	22	miRNA	CAGUGCAAUGAUGAAAGGGCAU
ssc-miR-133a-3p_st	MIMAT0000145	0.0217249	0.582516	1.16294	0.391729	0.981945	-1.05567	0.0844638	0.632141	1.11767	0.436844	0.380256	1.05036	0.293185	0.993609	1.06898	0.479491	0.588336	1.04849	0.344404	0.629755	1.06558	21	miRNA	UUGGUCCCCUUCAACCAGCUG
ssc-miR-133a-5p_st	MIMAT0026478	0.305605	0.874739	-1.12543	0.329089	0.981945	-1.11905	0.0104822	0.632141	-1.36284	0.000597446	0.0179234	-1.54487	0.0445182	0.993609	-1.2684	0.040542	0.383882	-1.29359	0.00621857	0.332444	-1.4246	22	miRNA	AGCUGGUAAAAUGGAACCAAAU
ssc-miR-133b_st	MIMAT0000769	0.0353934	0.582516	1.17026	0.641219	0.981945	-1.03416	0.0894826	0.632141	1.13341	0.363683	0.361037	1.06803	0.330204	0.993609	1.07318	0.728617	0.637911	1.02686	0.485229	0.657089	1.05494	23	miRNA	UUUGGUCCCCUUCAACCAGCUAU
ssc-miR-1343_st	MIMAT0019776	0.460904	0.924695	1.32852	0.840225	0.981945	1.08041	0.840998	0.869347	-1.08	0.0502185	0.160003	-2.17251	0.16551	0.993609	-1.71696	0.807942	0.647246	-1.10398	0.859328	0.746742	1.07477	22	miRNA	CUCCUGGGGCCCGCACUCUCGC
ssc-miR-139-5p_st	MIMAT0000250	0.0106438	0.582516	1.26984	0.416076	0.981945	1.07499	0.0241597	0.632141	1.23151	0.064447	0.184134	1.18334	0.88998	0.993609	1.01231	0.331534	0.549486	1.09615	0.0485947	0.438702	1.21072	22	miRNA	UCUACAGUGCACGUGUCUCCAG
ssc-miR-140_st	MIMAT0000151	0.491623	0.924695	1.26421	0.315458	0.981945	-1.41024	0.175366	0.632141	-1.59578	0.0243075	0.140929	-2.22263	0.550617	0.993609	1.22539	0.368003	0.574225	-1.38602	0.492665	0.657089	-1.28154	21	miRNA	AGUGGUUUUACCCUAUGGUAG
ssc-miR-140-star_st	MIMAT0000152	0.0641892	0.720774	-1.37909	0.0992368	0.981945	-1.32917	0.963265	0.881795	1.0078	0.279308	0.327531	1.20236	0.956366	0.993609	1.00927	0.996432	0.694628	-1.0008	0.040271	0.436269	-1.46277	23	miRNA	UACCACAGGGUAGAACCACGGAC
ssc-miR-142-5p_st	MIMAT0000154	0.508811	0.930465	-1.05867	0.380787	0.981945	1.07879	0.245481	0.632141	1.10627	0.201028	0.290643	1.11791	0.814942	0.993609	-1.02033	0.325775	0.549486	1.09455	0.976669	0.774679	1.00267	21	miRNA	CAUAAAGUAGAAAGCACUACU
ssc-miR-143-3p_st	MIMAT0000247	0.980565	0.944005	-1.00268	0.655211	0.981945	-1.0503	0.159571	0.632141	-1.16991	0.985322	0.568455	-1.00202	0.689311	0.993609	-1.0449	0.523507	0.588336	1.07734	0.00250034	0.307411	-1.46346	21	miRNA	UGAGAUGAAGCACUGUAGCUC
ssc-miR-143-5p_st	MIMAT0004599	0.463767	0.924695	1.32822	0.509467	0.981945	-1.29091	0.743702	0.858953	-1.13452	0.0533343	0.160003	-2.15826	0.810541	0.993609	-1.09691	0.52203	0.588336	-1.30056	0.0340934	0.395727	-2.46134	21	miRNA	GGUGCAGUGCUGCAUCUCUGG
ssc-miR-145_st	MIMAT0000157	0.602883	0.937124	1.05841	0.79651	0.981945	-1.02849	0.712519	0.858953	1.04098	0.273007	0.327531	1.12813	0.837207	0.993609	-1.02263	0.686447	0.629967	1.04779	0.960444	0.774679	1.00574	24	miRNA	GUCCAGUUUUCCCAGGAAUCCCUU
ssc-miR-146a_st	MIMAT0016989	0.428247	0.924695	1.08107	0.789904	0.981945	1.02644	0.0222916	0.632141	1.26356	0.443192	0.380256	1.07835	0.439947	0.993609	-1.07893	0.626861	0.615554	-1.05187	0.762229	0.726153	-1.03193	22	miRNA	CCUGUGAAGUUUAGUUCUUCAG
ssc-miR-146b_st	MIMAT0002809	0.173684	0.768505	1.31093	0.515569	0.981945	1.13636	0.975048	0.883711	1.00615	0.582957	0.445572	-1.11387	0.673595	0.993609	1.08615	0.440429	0.588336	1.17481	0.969534	0.774679	-1.00797	21	miRNA	UGAGAACUGAAUUCCAUAGGC
ssc-miR-148a_st	MIMAT0000243	0.562447	0.937124	-1.25439	0.962062	0.981945	1.01873	0.216423	0.632141	-1.63005	0.0525662	0.160003	-2.18373	0.752087	0.993609	1.13129	0.0686269	0.383882	-2.17102	0.27049	0.629755	-1.58529	22	miRNA	UCAGUGCACUACAGAACUUUGU
ssc-miR-148b_st	MIMAT0000580	0.391989	0.924695	1.49998	0.646162	0.981945	1.24172	0.389247	0.749571	-1.50356	0.200513	0.290643	-1.84229	0.243725	0.993609	-1.74211	0.43936	0.588336	-1.47409	0.348604	0.629755	-1.60235	22	miRNA	UCAGUGCAUCACAGAACUUUGU
ssc-miR-149_st	MIMAT0000159	0.032311	0.582516	1.34496	0.999331	0.999331	-1.00011	0.129614	0.632141	1.22845	0.466135	0.391163	1.10237	0.397587	0.993609	-1.11997	0.916836	0.670108	1.01486	0.202876	0.574688	1.19998	23	miRNA	UCUGGCUCCGUGUCUUCACUCCC
ssc-miR-151-3p_st	MIMAT0000757	0.978093	0.944005	1.00168	0.946057	0.981945	-1.00415	0.611399	0.846316	1.03167	0.00437966	0.0750799	-1.20583	0.181929	0.993609	-1.08653	0.383393	0.579083	-1.05864	0.442398	0.657089	1.05142	22	miRNA	CUAGACUGAAGCUCCUUGAGGA
ssc-miR-151-5p_st	MIMAT0004536	0.196682	0.776895	-1.08655	0.862727	0.981945	1.01102	0.120841	0.632141	-1.10558	0.0254479	0.140929	-1.15934	0.0765719	0.993609	-1.12222	0.29399	0.549486	-1.07382	0.118328	0.523723	-1.11318	21	miRNA	UCGAGGAGCUCACAGUCUAGU
ssc-miR-152_st	MIMAT0000162	0.101515	0.724422	-1.33773	0.366463	0.981945	-1.17109	0.191838	0.632141	-1.25857	0.861052	0.532609	-1.03087	0.451654	0.993609	-1.14036	0.18916	0.509502	-1.2782	0.0291153	0.395727	-1.51992	21	miRNA	UCAGUGCAUGACAGAACUUGG
ssc-miR-15a_st	MIMAT0000068	0.931822	0.944005	-1.03428	0.731551	0.981945	-1.14484	0.134769	0.632141	-1.82286	0.0217749	0.140929	-2.5739	0.810159	0.993609	-1.09929	0.920426	0.670108	-1.04262	0.324383	0.629755	-1.51457	21	miRNA	UAGCAGCACAUAAUGGUUUGU
ssc-miR-15b_st	MIMAT0000124	0.175311	0.768505	1.25965	0.0689567	0.981945	1.36845	0.468042	0.789586	-1.13	0.0779912	0.196883	-1.35453	0.241489	0.993609	1.21981	0.912554	0.670108	1.01972	0.585156	0.66495	1.10222	22	miRNA	UAGCAGCACAUCAUGGUUUACA
ssc-miR-16_st	MIMAT0000069	0.965721	0.944005	1.0039	0.628032	0.981945	1.04489	0.0852135	0.632141	-1.17314	0.0404545	0.156598	-1.21183	0.0746421	0.993609	1.18021	0.822425	0.648107	-1.02178	0.226988	0.604682	-1.12453	22	miRNA	UAGCAGCACGUAAAUAUUGGCG
ssc-miR-17-3p_st	MIMAT0000071	0.85933	0.937124	1.07897	0.753205	0.981945	-1.14444	0.253634	0.632141	-1.64027	0.354561	0.361037	-1.49153	0.441266	0.993609	1.39348	0.297492	0.549486	-1.61306	0.0453449	0.438702	-2.56464	22	miRNA	ACUGCAGUGAAGGCACUUGUAG
ssc-miR-17-5p_st	MIMAT0000070	0.983452	0.944005	1.00207	0.914992	0.981945	-1.01068	0.259004	0.632141	-1.12027	0.708143	0.494054	-1.03801	0.304025	0.993609	1.10874	0.198473	0.509502	-1.1476	0.285501	0.629755	-1.12058	23	miRNA	CAAAGUGCUUACAGUGCAGGUAG
ssc-miR-181a_st	MIMAT0000210	0.0233894	0.582516	1.37307	0.491921	0.981945	1.09674	0.527677	0.799079	1.0885	0.514189	0.416691	-1.09157	0.353853	0.993609	-1.13313	0.792513	0.64198	-1.03807	0.742926	0.726153	1.0477	24	miRNA	AACAUUCAACGCUGUCGGUGAGUU
ssc-miR-181b_st	MIMAT0000257	0.157127	0.768505	1.21398	0.834179	0.981945	1.02862	0.803569	0.858953	1.0341	0.0895569	0.196883	-1.2642	0.219587	0.993609	-1.18239	0.196327	0.509502	-1.20598	0.50682	0.657089	1.0999	24	miRNA	AACAUUCAUUGCUGUCGGUGGGUU
ssc-miR-181c_st	MIMAT0000258	0.0722414	0.720774	1.94417	0.120329	0.981945	-1.76915	0.923194	0.871116	-1.0353	0.164403	0.274006	-1.66288	0.405924	0.993609	-1.35091	0.242407	0.532561	-1.57038	0.336204	0.629755	-1.44758	22	miRNA	AACAUUCAACCUGUCGGUGAGU
ssc-miR-181d-3p_st	MIMAT0017264	0.00658762	0.582516	-1.39878	0.00262837	0.546702	-1.45801	0.00243633	0.448285	-1.4629	0.153978	0.263962	-1.18306	0.041228	0.993609	-1.27782	0.281825	0.549486	-1.14294	0.0113319	0.332444	-1.3895	22	miRNA	CCCACCGAGGGAUGAAUGUCAC
ssc-miR-181d-5p_st	MIMAT0002821	0.408515	0.924695	1.1212	0.570613	0.981945	1.0814	0.303762	0.690028	1.15349	0.0184376	0.140929	-1.40515	0.517701	0.993609	-1.09345	0.625724	0.615554	-1.07394	0.382357	0.640546	1.13693	24	miRNA	AACAUUCAUUGUUGUCGGUGGGUU
ssc-miR-183_st	MIMAT0000212	0.300383	0.874739	1.10592	0.568619	0.981945	-1.05662	0.789716	0.858953	1.02604	0.58226	0.445572	1.05457	0.099061	0.993609	1.1766	0.710674	0.637911	1.03868	0.476225	0.657089	-1.07585	23	miRNA	UAUGGCACUGGUAGAAUUCACUG
ssc-miR-1839-5p_st	MIMAT0009456	0.982221	0.944005	-1.0045	0.528401	0.981945	-1.13605	0.520987	0.799079	-1.13869	0.408184	0.371763	-1.18264	0.468472	0.993609	-1.15817	0.392389	0.580576	-1.2021	0.253525	0.629755	-1.28009	22	miRNA	AAGGUAGAUAGAACAGGUCUUG
ssc-miR-184_st	MIMAT0000454	0.642038	0.937124	-1.18663	0.801444	0.981945	-1.09686	0.579861	0.833939	-1.22622	0.0854475	0.196883	-1.91188	0.848133	0.993609	1.07292	0.359088	0.572173	-1.43329	0.278216	0.629755	1.53238	22	miRNA	UGGACGGAGAACUGAUAAGGGU
ssc-miR-185_st	MIMAT0000214	0.690164	0.937124	1.04574	0.257083	0.981945	1.13697	0.957178	0.881795	-1.00603	0.405789	0.371763	-1.09822	0.14481	0.993609	-1.18099	0.368296	0.574225	-1.11366	0.296752	0.629755	-1.13332	22	miRNA	UGGAGAGAAAGGCAGUUCCUGA
ssc-miR-186_st	MIMAT0000215	0.380927	0.924695	1.12286	0.0686159	0.981945	1.27905	0.791869	0.858953	1.0353	0.574149	0.444503	1.07684	0.285687	0.993609	1.15216	0.33727	0.549486	1.14428	0.543283	0.657089	-1.08869	23	miRNA	CAAAGAAUUCUCCUUUUGGGCUU
ssc-miR-18a_st	MIMAT0000072	0.660913	0.937124	-1.11621	0.71362	0.981945	1.09629	0.23515	0.632141	-1.3507	0.741851	0.506957	-1.086	0.825083	0.993609	1.05688	0.904063	0.670108	1.03251	0.0852964	0.522869	-1.59734	22	miRNA	UAAGGUGCAUCUAGUGCAGAUA
ssc-miR-18b_st	MIMAT0001412	0.98435	0.944005	1.00842	0.348889	0.981945	1.49658	0.513819	0.799079	-1.32305	0.250194	0.327531	-1.64344	0.513194	0.993609	1.3236	0.677648	0.629865	-1.2076	0.772663	0.726153	-1.13997	23	miRNA	UAAGGUGCAUCUAGUGCAGUUAG
ssc-miR-191_st	MIMAT0000221	0.572967	0.937124	-1.04067	0.796693	0.981945	1.01835	0.472035	0.789586	-1.05227	0.954783	0.560143	1.00401	0.341875	0.993609	-1.06989	0.0706072	0.383882	-1.14922	0.641869	0.704755	-1.03547	23	miRNA	CAACGGAAUCCCAAAAGCAGCUG
ssc-miR-192_st	MIMAT0000222	0.457966	0.924695	-1.34964	0.338521	0.981945	-1.47381	0.224268	0.632141	-1.64021	0.000560792	0.0179234	-4.66036	0.263798	0.993609	-1.57478	0.399318	0.583269	-1.43568	0.122471	0.523723	-1.95858	21	miRNA	CUGACCUAUGAAUUGACAGCC
ssc-miR-193a-3p_st	MIMAT0000223	0.719689	0.937124	1.18415	0.744241	0.981945	-1.16606	0.355212	0.728236	-1.54981	0.567865	0.444503	-1.30928	0.575557	0.993609	-1.30228	0.527474	0.588336	-1.37215	0.65852	0.705252	-1.24721	22	miRNA	AACUGGCCUACAAAGUCCCAGU
ssc-miR-193a-5p_st	MIMAT0004614	0.980502	0.944005	-1.00516	0.655705	0.981945	-1.09866	0.729113	0.858953	-1.07577	0.814802	0.511816	-1.05061	0.756431	0.993609	-1.06758	0.186933	0.509502	-1.3489	0.556709	0.657089	1.14079	22	miRNA	UGGGUCUUUGCGGGCGAGAUGA
ssc-miR-194-5p_st	MIMAT0000224	0.753851	0.937124	-1.03193	0.0646684	0.981945	-1.20989	0.107041	0.632141	-1.17944	0.251462	0.327531	-1.12317	0.150234	0.993609	-1.15797	0.0911116	0.412849	-1.20192	0.0926848	0.522869	-1.2008	22	miRNA	UGUAACAGCGACUCCAUGUGGA
ssc-miR-195_st	MIMAT0000225	0.803446	0.937124	-1.02921	0.840706	0.981945	-1.02352	0.787269	0.858953	1.03171	0.592416	0.449936	1.06401	0.239377	0.993609	-1.14755	0.512902	0.588336	1.08386	0.933152	0.774679	1.01034	21	miRNA	UAGCAGCACAGAAAUAUUGGC
ssc-miR-196b-3p_st	MIMAT0009201	0.874483	0.937124	1.01626	0.400139	0.981945	1.09024	0.914503	0.871116	1.01102	0.537458	0.424309	-1.06519	0.439059	0.993609	1.08262	0.0544071	0.383882	1.2398	0.945869	0.774679	-1.00738	22	miRNA	CGACAGCACGACACUGCCUUCA
ssc-miR-199a_st	MIMAT0000229	0.619442	0.937124	1.08513	0.730586	0.981945	-1.05821	0.890136	0.871116	-1.02294	0.656792	0.471946	1.0758	0.775123	0.993609	-1.04805	0.333329	0.549486	1.18505	0.0163665	0.332444	-1.55143	23	miRNA	CCCAGUGUUCAGACUACCUGUUC
ssc-miR-199a-3p_st	MIMAT0000232	0.962123	0.944005	-1.00691	0.748038	0.981945	-1.04769	0.118629	0.632141	-1.25971	0.0323198	0.142705	-1.38069	0.831009	0.993609	-1.03142	0.720852	0.637911	-1.05652	0.3601	0.629755	-1.1522	22	miRNA	ACAGUAGUCUGCACAUUGGUUA
ssc-miR-199a-5p_st	MIMAT0000229	0.489031	0.924695	1.14191	0.683204	0.981945	-1.0812	0.458262	0.787303	-1.15298	0.704154	0.494054	1.07533	0.868566	0.993609	1.03212	0.379744	0.579083	1.19619	0.0548146	0.468809	-1.49413	23	miRNA	CCCAGUGUUCAGACUACCUGUUC
ssc-miR-199a-star_st	MIMAT0000230	0.276589	0.874739	1.1785	0.752919	0.981945	1.04821	0.247191	0.632141	-1.19115	0.115487	0.227187	-1.27156	0.88794	0.993609	1.02129	0.78735	0.64198	-1.04371	0.247917	0.629755	-1.2035	21	miRNA	CAGUAGUCUGCACAUUGGUUA
ssc-miR-199b_st	MIMAT0000263	0.646715	0.937124	1.05613	0.952955	0.981945	-1.00704	0.900187	0.871116	-1.01503	0.730341	0.503683	-1.04189	0.777451	0.993609	-1.03422	0.309132	0.549486	1.1382	0.522539	0.657089	-1.08432	22	miRNA	CCCAGUGUUUAGACUAUCUGUU
ssc-miR-199b-star_st	MIMAT0000230	0.875833	0.937124	1.02218	0.604906	0.981945	1.0755	0.19268	0.632141	-1.20382	0.153094	0.263962	-1.22635	0.860144	0.993609	-1.02505	0.745672	0.639987	-1.04952	0.335849	0.629755	-1.15536	22	miRNA	UACAGUAGUCUGCACAUUGGUU
ssc-miR-19a_st	MIMAT0000073	0.115702	0.737134	-1.81533	0.119286	0.981945	-1.8044	0.0223564	0.632141	-2.42683	0.273245	0.327531	-1.50802	0.781273	0.993609	1.10863	0.187394	0.509502	-1.69332	0.0663394	0.513341	-2.10413	23	miRNA	UGUGCAAAUCUAUGCAAAACUGA
ssc-miR-19b_st	MIMAT0000074	0.299266	0.874739	-1.22448	0.372552	0.981945	-1.18953	0.100272	0.632141	-1.38421	0.526886	0.421508	-1.1306	0.712308	0.993609	1.07398	0.62648	0.615554	1.10517	0.0995834	0.522869	-1.41282	23	miRNA	UGUGCAAAUCCAUGCAAAACUGA
ssc-miR-20_st	MIMAT0000075	0.982492	0.944005	1.00371	0.893072	0.981945	1.02296	0.220416	0.632141	-1.23314	0.0888346	0.196883	-1.34243	0.0823476	0.993609	1.35116	0.495801	0.588336	1.13027	0.628553	0.694829	-1.09069	22	miRNA	UAAAGUGCUUAUAGUGCAGGUA
ssc-miR-202_st	MIMAT0002810	0.0900967	0.724422	1.27677	0.197209	0.981945	1.202	0.457631	0.787303	1.11068	0.901708	0.543744	-1.01753	0.899501	0.993609	1.01793	0.805354	0.647246	1.03747	0.0151417	0.332444	1.46412	21	miRNA	UUCCUAUGCAUAUACUUCUUU
ssc-miR-204_st	MIMAT0000237	0.232843	0.853657	-1.13541	0.894918	0.981945	-1.01399	0.0941902	0.632141	-1.19753	0.047211	0.15737	-1.24088	0.60593	0.993609	-1.05588	0.441017	0.588336	-1.09021	0.0473804	0.438702	-1.257	22	miRNA	UUCCCUUUGUCAUCCUAUGCCU
ssc-miR-205_st	MIMAT0000238	0.807051	0.937124	1.03211	0.267163	0.981945	1.15605	0.677153	0.858953	1.0554	0.174607	0.275696	1.19522	0.869474	0.993609	-1.02148	0.307344	0.549486	1.15173	0.692923	0.721794	1.05574	22	miRNA	UCCUUCAUUCCACCGGAGUCUG
ssc-miR-206_st	MIMAT0000239	0.682505	0.937124	1.27951	0.907828	0.981945	1.07216	0.694437	0.858953	1.26705	0.0347396	0.14375	-3.74285	0.490096	0.993609	1.51734	0.762031	0.64198	1.21338	0.412437	0.657089	-1.69228	22	miRNA	UGGAAUGUAAGGAAGUGUGUGA
ssc-miR-208b_st	MIMAT0004939	0.800065	0.937124	-1.07713	0.858695	0.981945	-1.0536	0.750937	0.858953	1.09762	0.817678	0.511816	-1.06996	0.798895	0.993609	1.07761	0.669012	0.62674	1.14242	0.448059	0.657089	-1.26754	22	miRNA	AUAAGACGAACAAAAGGUUUGU
ssc-miR-21_st	MIMAT0000076	0.833724	0.937124	1.1465	0.844604	0.981945	-1.13615	0.256924	0.632141	-2.10884	0.13527	0.24973	-2.69393	0.750232	0.993609	-1.2305	0.75893	0.64198	1.23624	0.519655	0.657089	-1.5623	22	miRNA	UAGCUUAUCAGACUGAUGUUGA
ssc-miR-210_st	MIMAT0000267	0.305034	0.874739	1.31631	0.36023	0.981945	1.27724	0.580132	0.833939	1.15869	0.0924409	0.198088	-1.58054	0.613872	0.993609	-1.14371	0.157419	0.507237	-1.49939	0.524053	0.657089	-1.19731	22	miRNA	CUGUGCGUGUGACAGCGGCUGA
ssc-miR-214_st	MIMAT0000271	0.461885	0.924695	-1.13078	0.326163	0.981945	-1.17893	0.672423	0.858953	-1.07295	0.87959	0.538572	1.02552	0.570119	0.993609	-1.09932	0.0631933	0.383882	-1.40139	0.0303853	0.395727	-1.48808	21	miRNA	ACAGCAGGCACAGACAGGCAG
ssc-miR-216_st	MIMAT0000273	0.0684917	0.720774	1.20954	0.179207	0.981945	-1.1485	0.351699	0.728236	1.09992	0.68632	0.490229	1.04191	0.193486	0.993609	-1.14329	0.636317	0.619234	1.05233	0.452504	0.657089	-1.08467	21	miRNA	UAAUCUCAGCUGGCAACUGUG
ssc-miR-218b_st	MIMAT0000275	0.79215	0.937124	-1.0529	0.354973	0.981945	1.1998	0.0822958	0.632141	-1.41701	0.24192	0.327531	-1.26043	0.753804	0.993609	-1.06329	0.989169	0.694456	-1.00282	0.378126	0.640058	-1.20198	22	miRNA	UUGUGCUUGAUCUAACCAUGUG
ssc-miR-221_st	MIMAT0000278	0.462287	0.924695	1.10814	0.689876	0.981945	1.05713	0.553521	0.821353	-1.08614	0.0204617	0.140929	-1.40142	0.922267	0.993609	-1.01366	0.729455	0.637911	1.05239	0.705025	0.725273	1.05749	22	miRNA	AGCUACAUUGUCUGCUGGGUUU
ssc-miR-222_st	MIMAT0000279	0.730955	0.937124	1.06003	0.474306	0.981945	1.12942	0.611739	0.846316	-1.08997	0.497407	0.411647	-1.12229	0.675714	0.993609	-1.07353	0.47144	0.588336	-1.13875	0.96099	0.774679	1.00882	24	miRNA	AGCUACAUCUGGCUACUGGGUCUC
ssc-miR-22-3p_st	MIMAT0000077	0.72513	0.937124	1.04675	0.80489	0.981945	1.03261	0.825357	0.858953	1.02907	0.379766	0.365947	1.12162	0.91264	0.993609	1.01435	0.61237	0.615554	1.07242	0.668362	0.705252	1.06086	22	miRNA	AAGCUGCCAGUUGAAGAACUGU
ssc-miR-22-5p_st	MIMAT0004495	0.412197	0.924695	1.2261	0.189642	0.981945	1.38952	0.716389	0.858953	-1.09406	0.0508783	0.160003	-1.64635	0.850387	0.993609	-1.04774	0.402255	0.583269	1.24719	0.25495	0.629755	1.35221	22	miRNA	AGUUCUUCAGUGGCAAGCUUUA
ssc-miR-2320_st	ssc-miR-2320_st	0.0179346	0.582516	2.10187	0.476164	0.981945	1.23865	0.64301	0.858953	-1.14899	0.0231605	0.140929	-2.03375	0.657066	0.993609	1.14226	0.0128821	0.311319	-2.29807	0.547382	0.657089	1.21103	22	miRNA	UGGCACAGGGUCCAGCUGUCGG
ssc-miR-2320-star_st	ssc-miR-2320-star_st	0.759885	0.937124	-1.08237	0.775745	0.981945	-1.07656	0.176743	0.632141	-1.42624	0.257102	0.327531	-1.34512	0.346979	0.993609	-1.27789	0.409751	0.586311	-1.25555	0.753233	0.726153	-1.0902	21	miRNA	CGAUGAUGGUCCCUGUGUUUG
ssc-miR-23a_st	MIMAT0000078	0.178994	0.768505	1.09886	0.767027	0.981945	-1.02069	0.775958	0.858953	1.01987	0.114119	0.227187	-1.11794	0.872404	0.993609	1.01116	0.781173	0.64198	1.02058	0.928956	0.774679	-1.00655	21	miRNA	AUCACAUUGCCAGGGAUUUCC
ssc-miR-23b_st	MIMAT0000125	0.0791048	0.720774	1.12522	0.547676	0.981945	1.04026	0.0805689	0.632141	1.12454	0.231572	0.323123	1.08248	0.944094	0.993609	1.0046	0.521626	0.588336	1.04565	0.199193	0.574688	1.09459	22	miRNA	AUCACAUUGCCAGGGAUUACCA
ssc-miR-24_st	MIMAT0000080	0.10815	0.724422	-1.05554	0.148222	0.981945	-1.04963	0.459028	0.787303	1.02478	0.724161	0.502308	1.01169	0.992721	0.994275	1.0003	0.229836	0.532561	-1.04335	0.00378352	0.307411	-1.11481	22	miRNA	UGGCUCAGUUCAGCAGGAACAG
ssc-miR-2476_st	ssc-miR-2476_st	0.369625	0.924695	-1.14311	0.731127	0.981945	-1.05225	0.817838	0.858953	-1.03471	0.246604	0.327531	-1.18949	0.941384	0.993609	1.01095	0.669964	0.62674	-1.06934	0.362964	0.629755	1.15474	21	miRNA	UCCCUGUGGUCUAGUGGUUAG
ssc-miR-24-star_st	MIMAT0004497	0.37891	0.924695	1.17026	0.818914	0.981945	-1.0415	0.737326	0.858953	-1.06141	0.394431	0.371763	-1.16429	0.251511	0.993609	-1.22856	0.791245	0.64198	1.05113	0.205464	0.574688	-1.27337	24	miRNA	GUGCCUACUGAGCUGAAACACAGU
ssc-miR-26a_st	MIMAT0000082	0.280894	0.874739	-1.03405	0.71694	0.981945	-1.01122	0.130185	0.632141	-1.04859	0.314221	0.342786	-1.0317	0.91117	0.993609	-1.00344	0.125854	0.490266	-1.05224	0.0282106	0.395727	-1.07742	22	miRNA	UUCAAGUAAUCCAGGAUAGGCU
ssc-miR-27a_st	MIMAT0000084	0.679525	0.937124	1.06445	0.701815	0.981945	-1.05958	0.37013	0.7323	-1.14595	0.797673	0.511816	-1.03948	0.794285	0.993609	-1.04018	0.105523	0.458289	1.30349	0.15268	0.531457	-1.26241	21	miRNA	UUCACAGUGGCUAAGUUCCGC
ssc-miR-27b_st	MIMAT0000126	0.788768	0.937124	-1.02869	0.924012	0.981945	1.01012	0.207806	0.632141	-1.14422	0.145355	0.260337	-1.16935	0.923099	0.993609	-1.01024	0.876446	0.66443	1.01756	0.316047	0.629755	-1.11983	21	miRNA	UUCACAGUGGCUAAGUUCUGC
ssc-miR-27b-star_st	MIMAT0004522	0.263846	0.868492	1.27527	0.948532	0.981945	1.014	0.910948	0.871116	1.02438	0.364009	0.361037	-1.21754	0.779072	0.993609	1.06231	0.861442	0.66441	1.04068	0.351655	0.629755	1.23898	23	miRNA	AGAGCUUAGCUGAUUGGUGAACA
ssc-miR-28-3p_st	MIMAT0004502	0.188299	0.774772	1.15997	0.436622	0.981945	-1.0908	0.686117	0.858953	1.04601	0.00906321	0.120843	-1.36012	0.499678	0.993609	-1.07822	0.991396	0.694456	1.00127	0.119952	0.523723	1.20578	22	miRNA	CACUAGAUUGUGAGCUCCUGGA
ssc-miR-28-5p_st	MIMAT0000085	0.967822	0.944005	-1.0087	0.956876	0.981945	-1.01168	0.81678	0.858953	-1.05102	0.422786	0.378614	-1.1889	0.762697	0.993609	-1.06702	0.522868	0.588336	-1.15718	0.368165	0.629755	-1.22915	22	miRNA	AAGGAGCUCACACUCUAUUGAG
ssc-miR-296_st	MIMAT0000374	0.705023	0.937124	1.06269	0.416221	0.981945	1.14016	0.529824	0.799079	1.10643	0.627535	0.456389	1.08112	0.340906	0.993609	1.16646	0.581987	0.601651	1.09847	0.560278	0.657089	1.1045	21	miRNA	GAGGGCCCCCCCCAAUCCUGU
ssc-miR-299_st	MIMAT0000377	0.192662	0.776547	1.35193	0.937261	0.981945	1.01812	0.961094	0.881795	1.01119	0.612996	0.456389	-1.1226	0.916522	0.993609	1.0242	0.476464	0.588336	-1.18891	0.857816	0.746742	-1.04432	21	miRNA	AUGGUUUACCGUCCCACAUAC
ssc-miR-29a_st	MIMAT0000086	0.655529	0.937124	-1.08052	0.633107	0.981945	-1.08642	0.692798	0.858953	-1.07096	0.78781	0.511816	1.04778	0.964658	0.993609	-1.00771	0.209517	0.514916	1.26337	0.420274	0.657089	-1.16064	23	miRNA	CUAGCACCAUCUGAAAUCGGUUA
ssc-miR-29c_st	MIMAT0000536	0.805664	0.937124	-1.11042	0.772935	0.981945	-1.13073	0.159155	0.632141	-1.83908	0.275728	0.327531	-1.59758	0.656892	0.993609	1.20844	0.506989	0.588336	1.35065	0.359259	0.629755	-1.51698	22	miRNA	UAGCACCAUUUGAAAUCGGUUA
ssc-miR-30a-3p_st	MIMAT0000088	0.128712	0.747667	1.19435	0.566569	0.981945	1.0681	0.160259	0.632141	-1.17784	0.0901083	0.196883	-1.22029	0.389098	0.993609	1.10445	0.166462	0.507245	-1.18648	0.109396	0.522869	1.22011	22	miRNA	CUUUCAGUCGGAUGUUUGCAGC
ssc-miR-30a-5p_st	MIMAT0000087	0.479896	0.924695	-1.08331	0.523486	0.981945	-1.07488	0.71768	0.858953	-1.04167	0.764257	0.510798	1.03443	0.969724	0.993609	-1.00429	0.136499	0.490266	1.19903	0.422601	0.657089	-1.10126	22	miRNA	UGUAAACAUCCUCGACUGGAAG
ssc-miR-30b-3p_st	MIMAT0004589	0.746394	0.937124	1.06566	0.89132	0.981945	-1.02721	0.987253	0.883711	1.00314	0.00227791	0.0546699	-1.91536	0.29177	0.993609	-1.23256	0.0479471	0.383882	-1.53138	0.755448	0.726153	1.06712	21	miRNA	CUGGGAGGUGGAUGUUUACUU
ssc-miR-30b-5p_st	MIMAT0000130	0.873496	0.937124	-1.02176	0.622129	0.981945	-1.06903	0.252553	0.632141	-1.16928	0.617236	0.456389	-1.07004	0.667224	0.993609	-1.05994	0.315931	0.549486	1.15606	0.755537	0.726153	-1.04569	22	miRNA	UGUAAACAUCCUACACUCAGCU
ssc-miR-30c_st	MIMAT0000244	0.110039	0.724422	1.10116	0.667148	0.981945	1.02574	0.200582	0.632141	1.07958	0.170104	0.275696	1.08573	0.0709913	0.993609	1.11576	0.041742	0.383882	1.14113	0.0972766	0.522869	1.11208	23	miRNA	UGUAAACAUCCUACACUCUCAGC
ssc-miR-30d_st	MIMAT0000245	0.669622	0.937124	1.02308	0.407287	0.981945	1.04552	0.909051	0.871116	1.00612	0.340974	0.352732	1.05258	0.762055	0.993609	-1.01631	0.853057	0.661684	-1.01055	0.511544	0.657089	1.03802	24	miRNA	UGUAAACAUCCCCGACUGGAAGCU
ssc-miR-30e-3p_st	MIMAT0000249	0.94803	0.944005	1.01509	0.726229	0.981945	1.08386	0.994175	0.883711	1.00168	0.00394612	0.0750799	-2.03706	0.659164	0.993609	1.10682	0.0422695	0.383882	-1.66965	0.126866	0.526059	1.46145	22	miRNA	CUUUCAGUCGGAUGUUUACAGC
ssc-miR-30e-5p_st	MIMAT0000692	0.395379	0.924695	-1.17205	0.600827	0.981945	-1.10226	0.482609	0.79005	-1.13985	0.331246	0.34868	1.19941	0.762581	0.993609	-1.05773	0.347949	0.560585	1.20467	0.16323	0.531457	-1.32198	24	miRNA	UGUAAACAUCCUUGACUGGAAGCU
ssc-miR-32_st	MIMAT0000090	0.15841	0.768505	1.23436	0.415874	0.981945	-1.1276	0.877516	0.871116	1.02288	0.801194	0.511816	1.03767	0.899905	0.993609	-1.01864	0.745916	0.639987	-1.05179	0.662428	0.705252	1.07045	21	miRNA	UAUUGCACAUUACUAAGUUGC
ssc-miR-320_st	MIMAT0000510	0.291194	0.874739	1.19942	0.618899	0.981945	1.08879	0.626443	0.858953	1.08679	0.325897	0.347746	-1.18416	0.415273	0.993609	-1.15006	0.174769	0.509502	-1.2834	0.834648	0.737865	1.03852	23	miRNA	AAAAGCUGGGUUGAGAGGGCGAA
ssc-miR-323_st	MIMAT0000551	0.487449	0.924695	1.13069	0.34222	0.981945	1.18366	0.192581	0.632141	1.26224	0.753727	0.508547	1.05688	0.420445	0.993609	1.1534	0.569442	0.601651	1.11248	0.295275	0.629755	1.21823	22	miRNA	GCACAUUACACGGUCGACCUCU
ssc-miR-324_st	MIMAT0000555	0.0802888	0.720774	1.56132	0.361358	0.981945	1.25626	0.908326	0.871116	-1.02899	0.000434594	0.0179234	-2.64554	0.213707	0.993609	-1.36707	0.695562	0.634318	-1.10865	0.535617	0.657089	-1.17773	23	miRNA	CGCAUCCCCUAGGGCAUUGGUGU
ssc-miR-326_st	MIMAT0000559	0.164782	0.768505	1.19095	0.963822	0.981945	-1.00563	0.462113	0.787303	1.09573	0.367858	0.361828	1.11874	0.858943	0.993609	-1.02224	0.084146	0.402786	1.26178	0.132405	0.526059	1.22303	20	miRNA	CCUCUGGGCCCUUCCUCCAG
ssc-miR-328_st	MIMAT0000565	0.651245	0.937124	1.15894	0.566433	0.981945	-1.20596	0.5673	0.833939	1.20546	0.0961562	0.198944	-1.74179	0.165426	0.993609	-1.58294	0.305178	0.549486	-1.42969	0.848069	0.744926	1.06846	22	miRNA	CUGGCCCUCUCUGCCCUUCCGU
ssc-miR-331-3p_st	MIMAT0000571	0.635619	0.937124	-1.04398	0.291164	0.981945	-1.10143	0.64769	0.858953	1.04238	0.80655	0.511816	-1.02246	0.188004	0.993609	-1.12877	0.0378152	0.383882	1.23026	0.789459	0.726153	-1.02603	21	miRNA	GCCCCUGGGCCUAUCCUAGAA
ssc-miR-331-5p_st	MIMAT0004643	0.402408	0.924695	1.22389	0.560854	0.981945	-1.15015	0.76782	0.858953	-1.07344	0.0188459	0.140929	-1.8051	0.28362	0.993609	-1.29654	0.00696377	0.311319	-2.07719	0.252298	0.629755	-1.34245	21	miRNA	UCUAGGUAUGGUCCCAGGGAU
ssc-miR-335_st	MIMAT0000765	0.51504	0.933215	1.09688	0.23497	0.981945	1.18544	0.598502	0.846316	1.07756	0.815935	0.511816	1.03351	0.674631	0.993609	1.06131	0.381759	0.579083	-1.14128	0.977288	0.774679	1.00428	22	miRNA	UCAAGAGCAAUAACGAAAAAUG
ssc-miR-339-3p_st	MIMAT0004702	0.840657	0.937124	-1.03954	0.748259	0.981945	1.06388	0.443619	0.787303	-1.16001	0.449969	0.380256	-1.1576	0.881991	0.993609	1.02904	0.0861128	0.402786	-1.43314	0.50242	0.657089	-1.14759	21	miRNA	AGCUCCUCGAGGCCAGAGCCC
ssc-miR-339-5p_st	MIMAT0000584	0.405352	0.924695	1.12584	0.843102	0.981945	-1.02844	0.176721	0.632141	1.21446	0.0290407	0.140929	1.3799	0.169618	0.993609	1.21852	0.334682	0.549486	1.15726	0.485236	0.657089	-1.111	22	miRNA	UCCCUGUCCUCCAGGAGCUCAC
ssc-miR-340_st	MIMAT0004651	0.378965	0.924695	-1.17837	0.290051	0.981945	-1.21891	0.221915	0.632141	-1.25768	0.409464	0.371763	-1.16621	0.277345	0.993609	-1.22551	0.587064	0.601651	1.11297	0.570151	0.657089	-1.11843	22	miRNA	UUAUAAAGCAAUGAGACUGAUU
ssc-miR-342_st	MIMAT0000590	0.877813	0.937124	1.01916	0.429668	0.981945	-1.10295	0.183047	0.632141	1.18154	0.030829	0.142288	1.31964	0.651805	0.993609	-1.05738	0.558904	0.601651	1.07976	0.150649	0.531457	1.21104	25	miRNA	UCUCACACAGAAAUCGCACCCGUCA
ssc-miR-345-3p_st	MIMAT0004656	0.769232	0.937124	-1.0826	0.811031	0.981945	-1.0668	0.28995	0.666886	-1.33482	0.000539764	0.0179234	-2.82488	0.138885	0.993609	-1.5032	0.0699538	0.383882	-1.70637	0.181308	0.566587	-1.47571	21	miRNA	CCCUGAACUAGGGGUCUGGAG
ssc-miR-345-5p_st	MIMAT0000595	0.128229	0.747667	1.36574	0.788383	0.981945	1.05544	0.7712	0.858953	1.06021	0.793009	0.511816	1.05417	0.422853	0.993609	-1.17576	0.815631	0.648107	1.05097	0.365125	0.629755	-1.21452	21	miRNA	GCUGACUCCUAGUCCAGUGCU
ssc-miR-34a_st	MIMAT0000255	0.254606	0.866452	1.22368	0.518074	0.981945	1.12038	0.348997	0.728236	-1.17981	0.264059	0.327531	-1.21873	0.429212	0.993609	-1.14945	0.283052	0.549486	1.22324	0.48295	0.657089	1.13992	22	miRNA	UGGCAGUGUCUUAGCUGGUUGU
ssc-miR-361-3p_st	MIMAT0017075	0.054992	0.679221	-1.51988	0.110984	0.981945	-1.411	0.182932	0.632141	-1.33085	0.358131	0.361037	-1.21612	0.0411533	0.993609	-1.56416	0.0502623	0.383882	-1.57395	0.144426	0.531457	-1.39549	24	miRNA	CCCCCAGGUGUGAUUCUGAUUUGC
ssc-miR-361-5p_st	MIMAT0000703	0.788482	0.937124	1.02161	0.964541	0.981945	1.00355	0.731654	0.858953	-1.02771	0.803638	0.511816	-1.02001	0.289775	0.993609	-1.08883	0.129681	0.490266	-1.13941	0.351868	0.629755	-1.08243	22	miRNA	UUAUCAGAAUCUCCAGGGGUAC
ssc-miR-362_st	MIMAT0000705	0.857341	0.937124	-1.05426	0.745682	0.981945	-1.1001	0.194515	0.632141	-1.4722	0.046892	0.15737	-1.82956	0.177135	0.993609	-1.49604	0.195619	0.509502	-1.50558	0.440342	0.657089	-1.27346	25	miRNA	AAUCCUUGGAACCUAGGUGUGAGUG
ssc-miR-363_st	MIMAT0000707	0.99312	0.944005	-1.00491	0.481966	0.981945	1.49368	0.0290028	0.632141	-3.64171	0.0214693	0.140929	-3.92511	0.698926	0.993609	-1.24616	0.569126	0.601651	-1.41072	0.757658	0.726153	1.20457	23	miRNA	AAUUGCACGGUAUCCAUCUGUAA
ssc-miR-365-3p_st	MIMAT0000710	0.79203	0.937124	-1.03105	0.0998452	0.981945	-1.21551	0.525006	0.799079	-1.07672	0.0461446	0.15737	-1.27009	0.733913	0.993609	-1.04022	0.551595	0.601651	-1.07617	0.611687	0.685511	-1.06454	22	miRNA	UAAUGCCCCUAAAAAUCCUUAU
ssc-miR-365-5p_st	MIMAT0017179	0.35998	0.924695	1.13982	0.259685	0.981945	1.17554	0.989479	0.883711	1.00187	0.436481	0.380256	-1.11743	0.798485	0.993609	-1.03693	0.879797	0.66443	-1.02303	0.367848	0.629755	1.14628	23	miRNA	GAGGGACUUUCAGGGGCAGCUGU
ssc-miR-374a_st	MIMAT0000727	0.423593	0.924695	-1.13709	0.68915	0.981945	1.06605	0.362016	0.728236	-1.15788	0.971253	0.563045	-1.00577	0.816734	0.993609	1.03772	0.232938	0.532561	-1.2269	0.41763	0.657089	-1.14803	22	miRNA	UUAUAAUACAACCUGAUAAGUG
ssc-miR-374b-5p_st	MIMAT0003727	0.164369	0.768505	1.50609	0.0279465	0.981945	1.94194	0.9222	0.871116	1.0287	0.292048	0.327531	-1.36088	0.482261	0.993609	1.22682	0.787635	0.64198	1.08635	0.144013	0.531457	1.57958	22	miRNA	AUAUAAUACAACCUGCUAAGUG
ssc-miR-376a_st	MIMAT0000729	0.70657	0.937124	-1.04888	0.406071	0.981945	-1.11162	0.870849	0.871116	-1.0208	0.308019	0.342244	1.13907	0.475435	0.993609	1.095	0.181102	0.509502	1.20004	0.810459	0.735752	-1.03275	21	miRNA	AUCAUAGAGGAAAAUCCACGU
ssc-miR-378_st	MIMAT0000732	0.436518	0.924695	1.04966	0.816619	0.981945	1.01448	0.209324	0.632141	-1.08204	0.706539	0.494054	-1.02364	0.0242688	0.993609	-1.15699	0.00069811	0.101226	-1.27934	0.0747582	0.522869	-1.12788	22	miRNA	ACUGGACUUGGAGUCAGAAGGC
ssc-miR-382_st	MIMAT0000737	0.0919552	0.724422	1.70752	0.118977	0.981945	1.63767	0.787513	0.858953	1.08718	0.395969	0.371763	-1.30301	0.145981	0.993609	1.58209	0.463712	0.588336	-1.27374	0.741037	0.726153	1.11487	21	miRNA	AAGUUGUUCGUGGUGGAUUCG
ssc-miR-383_st	MIMAT0017082	0.102114	0.724422	-1.18485	0.0703315	0.981945	-1.20775	0.550524	0.821353	1.06261	0.699772	0.494054	-1.03994	0.925282	0.993609	-1.00956	0.248765	0.538371	-1.1337	0.557122	0.657089	1.0654	21	miRNA	CCACAGCACUGCCUGGUCAGA
ssc-miR-411_st	MIMAT0001093	0.452629	0.924695	-1.14864	0.890876	0.981945	1.02552	0.946549	0.881795	-1.01239	0.445659	0.380256	-1.15113	0.697749	0.993609	1.07402	0.566822	0.601651	-1.11836	0.340075	0.629755	-1.20594	20	miRNA	AUGUAACACGGUCCACUAAC
ssc-miR-423-3p_st	MIMAT0001340	0.0786141	0.720774	1.21451	0.401958	0.981945	-1.09498	0.999852	0.884485	-1.00002	0.131309	0.246204	-1.18007	0.0418665	0.993609	-1.25468	0.0570044	0.383882	-1.25117	0.20566	0.574688	-1.15771	23	miRNA	AGCUCGGUCUGAGGCCCCUCAGU
ssc-miR-423-5p_st	MIMAT0004748	0.584917	0.937124	-1.10107	0.471615	0.981945	-1.13556	0.459582	0.787303	-1.13955	0.267366	0.327531	-1.21783	0.0483056	0.993609	-1.43185	0.0659123	0.383882	-1.42335	0.441773	0.657089	-1.15509	23	miRNA	UGAGGGGCAGAGAGCGAGACUUU
ssc-miR-424_st	MIMAT0001341	0.78141	0.937124	-1.03649	0.227056	0.981945	1.17101	0.381374	0.746519	1.12044	0.258133	0.327531	1.15899	0.601121	0.993609	1.06998	0.515529	0.588336	1.09346	0.888327	0.759754	1.01941	22	miRNA	CAGCAGCAAUUCAUGUUUUGAA
ssc-miR-424-star_st	MIMAT0004749	0.352399	0.924695	1.44621	0.241463	0.981945	1.59476	0.413465	0.771904	-1.38253	0.0435974	0.15737	-2.27707	0.0999204	0.993609	-1.94074	0.0736429	0.383882	-2.15527	0.531403	0.657089	-1.29993	21	miRNA	CAAAACGUGAGGCGCUGCUAU
ssc-miR-425-3p_st	MIMAT0001343	0.233295	0.853657	1.20178	0.278144	0.981945	-1.18163	0.600559	0.846316	-1.08325	0.535948	0.424309	-1.09923	0.274239	0.993609	-1.18327	0.073693	0.383882	-1.34585	0.538909	0.657089	-1.10475	22	miRNA	AUCGGGAAUGUCGUGUCCGCCC
ssc-miR-425-5p_st	MIMAT0003393	0.963381	0.944005	-1.00484	0.909285	0.981945	-1.01206	0.807268	0.858953	-1.02601	0.0449258	0.15737	-1.24401	0.270664	0.993609	1.12421	0.702045	0.636229	-1.04367	0.619972	0.690037	1.05701	23	miRNA	AAUGACACGAUCACUCCCGUUGA
ssc-miR-429_st	MIMAT0001537	0.24307	0.857255	-1.20137	0.368034	0.981945	-1.1512	0.109313	0.632141	-1.28951	0.517391	0.416691	-1.1062	0.926697	0.993609	1.0144	0.490626	0.588336	-1.1208	0.105644	0.522869	-1.31342	22	miRNA	UAAUACUGUCUGGUAAUGCCGU
ssc-miR-432-5p_st	MIMAT0002814	0.16176	0.768505	1.41794	0.727738	0.981945	1.08931	0.908346	0.871116	1.02867	0.1789	0.277465	-1.39799	0.918167	0.993609	1.02554	0.578193	0.601651	-1.1562	0.787465	0.726153	-1.07276	21	miRNA	UCUUGGAGUAGGUCAUUGGGU
ssc-miR-4331_st	MIMAT0025464	0.0168792	0.582516	-2.02699	0.513646	0.981945	-1.20271	0.490896	0.792323	-1.21501	0.487782	0.406485	1.21672	0.672505	0.993609	1.1266	0.593353	0.601651	1.17335	0.971776	0.774679	-1.01062	22	miRNA	UGUGGCUGUGGUGUAGGCCAGC
ssc-miR-4332_st	MIMAT0013803	0.174747	0.768505	1.41083	0.339113	0.981945	1.27192	0.313951	0.691969	1.28864	0.215265	0.307522	1.36816	0.922084	0.993609	1.02472	0.510271	0.588336	1.19125	0.344775	0.629755	1.28672	20	miRNA	CACGGCCGCCGCCGGGCGCC
ssc-miR-4334-3p_st	MIMAT0000584	0.404182	0.924695	1.09917	0.468958	0.981945	-1.08542	0.133595	0.632141	1.18803	0.0813994	0.196883	1.22325	0.0718879	0.993609	1.23182	0.14007	0.490266	1.1968	0.332169	0.629755	-1.12393	20	miRNA	UCCCUGUCCUCCAGGAGCUC
ssc-miR-4334-5p_st	ssc-miR-4334-5p_st	0.961129	0.944005	-1.01891	0.636606	0.981945	1.19951	0.859839	0.871116	1.07024	0.287574	0.327531	-1.51081	0.651511	0.993609	-1.18992	0.0767763	0.383882	-2.09783	0.611648	0.685511	1.23049	19	miRNA	CCCUGGAGUGACGGGGGUG
ssc-miR-4337_st	ssc-miR-4337_st	0.0873124	0.724422	1.21428	0.15841	0.981945	1.17221	0.07928	0.632141	1.22085	0.811677	0.511816	1.02676	0.540389	0.993609	1.07039	0.297912	0.549486	1.13136	0.556213	0.657089	1.0718	22	miRNA	AGGGUAUAUAAGCCUUCACUGG
ssc-miR-4338_st	ssc-miR-4338_st	0.483953	0.924695	1.09512	0.83883	0.981945	1.02665	0.319386	0.691969	-1.13861	0.766197	0.510798	-1.03922	0.994275	0.994275	1.00093	0.758649	0.64198	-1.04306	0.835491	0.737865	1.02889	22	miRNA	AUGUUCAGUCUCAGUGGGAACC
ssc-miR-4339_st	MIMAT0014860	0.860199	0.937124	1.1016	0.661124	0.981945	1.27274	0.700473	0.858953	-1.23561	0.381195	0.365947	-1.62277	0.124425	0.993609	-2.36568	0.167916	0.507245	-2.26245	0.779606	0.726153	1.1772	24	miRNA	GCUCUGAGCUGCCCCUCCUCGUCC
ssc-miR-450b-5p_st	MIMAT0004909	0.610946	0.937124	-1.08766	0.849104	0.981945	-1.03186	0.817939	0.858953	-1.03869	0.784281	0.511816	-1.04618	0.501774	0.993609	1.11754	0.240234	0.532561	-1.23086	0.542991	0.657089	-1.11257	22	miRNA	UUUUGCAAUAUGUUCCUGAAUA
ssc-miR-451_st	MIMAT0001631	0.797977	0.937124	-1.07903	0.244675	0.981945	1.41837	0.23523	0.632141	-1.42871	0.879668	0.538572	-1.046	0.217797	0.993609	1.44884	0.659981	0.625472	1.14891	0.82352	0.737865	-1.07281	22	miRNA	AAACCGUUACCAUUACUGAGUU
ssc-miR-455_st	MIMAT0004784	0.165467	0.768505	1.22845	0.784441	0.981945	-1.04076	0.714619	0.858953	1.05488	0.597416	0.45088	1.08032	0.977341	0.994275	1.00415	0.137991	0.490266	1.26359	0.996031	0.778149	1.00077	21	miRNA	GCAGUCCAUGGGCAUAUACAC
ssc-miR-484_st	MIMAT0003283	0.655772	0.937124	-1.13276	0.171695	0.981945	-1.47357	0.763154	0.858953	-1.08784	0.412038	0.371763	-1.25901	0.322787	0.993609	-1.32093	0.164121	0.507245	-1.52019	0.64828	0.705252	-1.1449	20	miRNA	CCCAGGGGGCGACCCAGGCU
ssc-miR-486_st	MIMAT0002177	0.105673	0.724422	1.20377	0.702724	0.981945	-1.04377	0.432584	0.787303	1.09246	0.94666	0.559602	-1.00753	0.894715	0.993609	1.01495	0.463034	0.588336	-1.09161	0.163525	0.531457	1.18343	22	miRNA	UCCUGUACUGAGCUGCCCCGAG
ssc-miR-487b_st	MIMAT0026614	0.762639	0.937124	1.03199	0.0499365	0.981945	1.23503	0.31966	0.691969	1.11023	0.438691	0.380256	1.08448	0.201349	0.993609	1.14453	0.463637	0.588336	-1.08477	0.48282	0.657089	-1.081	22	miRNA	GUGGUUAUCCCUGUCCUGUUCG
ssc-miR-490_st	MIMAT0004764	0.698013	0.937124	1.0545	0.996891	0.999331	-1.00053	0.259464	0.632141	-1.16848	0.131015	0.246204	-1.23407	0.364536	0.993609	-1.13284	0.387424	0.57914	-1.1343	0.0579571	0.470901	-1.32746	20	miRNA	CCAUGGAUCCCCAGGUGGGU
ssc-miR-491_st	MIMAT0002807	0.673326	0.937124	1.0504	0.960448	0.981945	-1.00579	0.0492039	0.632141	1.26711	0.290202	0.327531	-1.13241	0.438487	0.993609	-1.09492	0.0584329	0.383882	-1.27253	0.738299	0.726153	-1.04217	22	miRNA	AGUGGGGAACCCUUCCAUGAGG
ssc-miR-494_st	MIMAT0026607	0.927873	0.944005	-1.00928	0.486208	0.981945	1.07399	0.813865	0.858953	1.02434	0.607492	0.455619	1.05396	0.340781	0.993609	1.10296	0.0119335	0.311319	1.33298	0.106301	0.522869	1.19577	22	miRNA	AGGUUGUCGUGUUGUCUUCUCU
ssc-miR-497_st	MIMAT0002820	0.691712	0.937124	1.04949	0.75666	0.981945	1.03845	0.781723	0.858953	1.0343	0.0293601	0.140929	1.31788	0.348082	0.993609	-1.12188	0.0154138	0.319286	1.38921	0.281555	0.629755	-1.15064	21	miRNA	CAGCAGCACACUGUGGUUUGU
ssc-miR-499-3p_st	MIMAT0004772	0.805145	0.937124	-1.06237	0.660211	0.981945	1.11398	0.485194	0.79005	-1.18743	0.224837	0.317416	-1.35156	0.462723	0.993609	-1.19822	0.107461	0.458289	1.53394	0.269507	0.629755	-1.33651	22	miRNA	AACAUCACAGCAAGUCUGUGCU
ssc-miR-499-5p_st	MIMAT0002870	0.82495	0.937124	-1.07455	0.874877	0.981945	-1.05251	0.160807	0.632141	-1.58938	0.29011	0.327531	-1.41483	0.883223	0.993609	-1.04889	0.877876	0.66443	1.0544	0.393686	0.649754	-1.34417	21	miRNA	UUAAGACUUGCAGUGAUGUUU
ssc-miR-500_st	MIMAT0002871	0.281917	0.874739	1.56861	0.228306	0.981945	1.65749	0.573108	0.833939	-1.26374	0.327461	0.347746	-1.50532	0.58874	0.993609	-1.25176	0.236126	0.532561	-1.69357	0.948721	0.774679	-1.02867	21	miRNA	AUGCACCUGGGCAAGGAUUCU
ssc-miR-503_st	MIMAT0003188	0.957712	0.944005	-1.0192	0.848867	0.981945	-1.07076	0.117459	0.632141	-1.77418	0.0692039	0.191025	-1.95491	0.946005	0.993609	-1.02459	0.590369	0.601651	-1.22788	0.214994	0.582275	-1.61269	23	miRNA	UAGCAGCGGGAACAGUACUGCAG
ssc-miR-504_st	MIMAT0002875	0.258839	0.866452	1.72238	0.888621	0.981945	1.069	0.869438	0.871116	-1.08146	0.164372	0.274006	-1.96077	0.0824616	0.993609	-2.33671	0.311563	0.549486	-1.67487	0.994282	0.778149	-1.00363	23	miRNA	AGACCCUGGUCUGCACUCUAUCU
ssc-miR-505_st	MIMAT0002876	0.236759	0.853657	1.25914	0.723199	0.981945	-1.07062	0.231839	0.632141	-1.26228	0.243329	0.327531	-1.25502	0.653918	0.993609	-1.09028	0.454961	0.588336	-1.16561	0.0807369	0.522869	1.44181	22	miRNA	UCAACACUUGCUGGUUUCCUCU
ssc-miR-532-3p_st	MIMAT0004780	0.0294589	0.582516	2.17463	0.465111	0.981945	1.28582	0.501984	0.799079	1.25973	0.182665	0.277465	-1.58963	0.498419	0.993609	-1.26218	0.683636	0.629967	-1.15985	0.777248	0.726153	1.10835	22	miRNA	CCUCCCACACCCAAGGCUUGCA
ssc-miR-532-5p_st	MIMAT0002888	0.985333	0.944005	-1.00297	0.387526	0.981945	-1.1505	0.361815	0.728236	-1.15959	0.923322	0.553993	-1.01564	0.26669	0.993609	-1.19837	0.431945	0.588336	-1.14464	0.968025	0.774679	-1.00688	22	miRNA	CAUGCCUUGAGUGUAGGACCGU
ssc-miR-542-3p_st	MIMAT0003172	0.1202	0.741859	1.22881	0.135031	0.981945	1.2188	0.0736332	0.632141	1.26973	0.148039	0.261246	1.21079	0.242709	0.993609	1.16593	0.469527	0.588336	1.10527	0.94723	0.774679	-1.00916	22	miRNA	UGUGACAGAUUGAUAACUGAAA
ssc-miR-542-5p_st	MIMAT0003171	0.0550255	0.679221	2.20229	0.871623	0.981945	1.06657	0.973081	0.883711	1.01355	0.189416	0.283107	-1.70062	0.806146	0.993609	-1.10286	0.287162	0.549486	-1.5754	0.339875	0.629755	-1.50198	21	miRNA	UCGGGGAUCAUCAUGUCACGA
ssc-miR-545_st	MIMAT0003165	0.662984	0.937124	-1.04532	0.31648	0.981945	-1.10802	0.104273	0.632141	1.18375	0.859572	0.532609	1.01813	0.889731	0.993609	1.01418	0.930732	0.670108	-1.00941	0.42771	0.657089	-1.08966	22	miRNA	AUCAACAAACAUUUAUUGUGUG
ssc-miR-574_st	MIMAT0003239	0.0430731	0.607638	1.38267	0.322972	0.981945	1.16665	0.608897	0.846316	1.08254	0.0861093	0.196883	1.31284	0.944342	0.993609	-1.01086	0.733762	0.637911	1.05744	0.514808	0.657089	1.1132	22	miRNA	CACGCUCAUGCACACACCCACA
ssc-miR-615_st	MIMAT0003283	0.841629	0.937124	-1.02904	0.457957	0.981945	-1.11271	0.149753	0.632141	-1.23364	0.119051	0.230421	-1.25597	0.464766	0.993609	-1.1109	0.535483	0.592711	-1.09904	0.885492	0.759754	1.02212	21	miRNA	UCCGAGCCUGGGUCUCCCUCU
ssc-miR-628_st	MIMAT0004809	0.0261851	0.582516	2.21111	0.014805	0.981945	2.40443	0.862935	0.871116	-1.06085	0.818905	0.511816	1.08151	0.130553	0.993609	1.69443	0.89443	0.670108	1.04933	0.1094	0.522869	1.81059	22	miRNA	AUGCUGACAUAUUUACUAGAGG
ssc-miR-652_st	MIMAT0022709	0.671139	0.937124	1.20932	0.526659	0.981945	1.32834	0.785297	0.858953	-1.12957	0.169382	0.275696	-1.86662	0.36248	0.993609	-1.50664	0.140894	0.490266	-2.03608	0.0099856	0.332444	-3.64419	26	miRNA	ACAACCCUAGGAGAGGGUGCCAUUCA
ssc-miR-664-3p_st	MIMAT0022272	0.888148	0.94306	1.0168	0.5331	0.981945	1.07686	0.153557	0.632141	-1.1876	0.372576	0.363489	-1.11215	0.19687	0.993609	-1.16765	0.275759	0.549486	-1.14829	0.739882	0.726153	1.04262	24	miRNA	UAUUCAUUUAUCUCCCAGCCUACA
ssc-miR-664-5p_st	MIMAT0005948	0.697143	0.937124	1.06103	0.65695	0.981945	-1.06997	0.364118	0.728236	1.14905	0.509968	0.416691	-1.10576	0.184656	0.993609	-1.22716	0.223004	0.531943	-1.22016	0.655892	0.705252	1.07462	23	miRNA	CAGGCUAGGAGAAGUGAUUGGAU
ssc-miR-676-3p_st	MIMAT0018204	0.613905	0.937124	1.29126	0.306759	0.981945	1.68424	0.409706	0.771904	-1.52075	0.0821089	0.196883	-2.46431	0.994007	0.994275	1.0038	0.818372	0.648107	-1.13111	0.867938	0.750213	-1.09328	21	miRNA	CCGUCCUAAGGUUGUUGAGUU
ssc-miR-7_st	MIMAT0000252	0.715146	0.937124	-1.10727	0.619354	0.981945	1.14893	0.116947	0.632141	-1.56275	0.0561564	0.16436	-1.73232	0.954861	0.993609	-1.01591	0.200287	0.509502	-1.46837	0.732587	0.726153	-1.10647	24	miRNA	UGGAAGACUAGUGAUUUUGUUGUU
ssc-miR-708-5p_st	MIMAT0004828	0.237727	0.853657	1.55684	0.78838	0.981945	-1.10463	0.0638974	0.632141	-2.02772	0.143467	0.260337	-1.73673	0.967288	0.993609	-1.01531	0.257396	0.540904	-1.56823	0.51738	0.657089	-1.29087	23	miRNA	AAGGAGCUUACAAUCUAGCUGGG
ssc-miR-744_st	MIMAT0004187	0.485726	0.924695	1.19324	0.964407	0.981945	1.01133	0.667399	0.858953	-1.11475	0.0955287	0.198944	-1.53848	0.37892	0.993609	-1.25049	0.255822	0.540904	-1.36008	0.712725	0.726153	-1.10371	22	miRNA	UGCGGGGCUAGGGCUAACAGCA
ssc-miR-769-3p_st	MIMAT0003887	0.167172	0.768505	1.71343	0.896197	0.981945	1.05132	0.164816	0.632141	-1.71875	0.433776	0.380256	-1.35229	0.872965	0.993609	-1.06326	0.146236	0.490266	-1.82543	0.940957	0.774679	1.03059	23	miRNA	CUGGGAUCUCUGGGGUCUUGGUU
ssc-miR-769-5p_st	MIMAT0003886	0.913504	0.944005	1.03713	0.316725	0.981945	-1.40338	0.425601	0.783105	-1.30844	0.288256	0.327531	-1.43308	0.93248	0.993609	-1.02884	0.983349	0.694456	-1.00746	0.134777	0.526059	-1.72044	21	miRNA	UGAGACCUCUGGGUUCUGAGC
ssc-miR-885-3p_st	MIMAT0004948	0.994193	0.944005	-1.00137	0.906435	0.981945	-1.02243	0.943623	0.881795	-1.01343	0.0716344	0.191025	-1.4183	0.219539	0.993609	-1.26447	0.315019	0.549486	-1.22485	0.723268	0.726153	1.07352	21	miRNA	AGGCAGCGGGGUGUAGUGGAU
ssc-miR-885-5p_st	MIMAT0004947	0.326488	0.895574	1.34452	0.352817	0.981945	1.32325	0.765242	0.858953	1.09355	0.934897	0.555385	1.02475	0.625772	0.993609	1.15747	0.789877	0.64198	1.08831	0.180706	0.566587	1.5394	22	miRNA	UCCAUUACACUACCCUGCCUCU
ssc-miR-92a_st	MIMAT0000092	0.236036	0.853657	1.13627	0.727167	0.981945	1.03791	0.956396	0.881795	-1.00584	0.510963	0.416691	-1.07281	0.241491	0.993609	1.13455	0.504907	0.588336	-1.07856	0.440596	0.657089	1.09153	22	miRNA	UAUUGCACUUGUCCCGGCCUGU
ssc-miR-92b-3p_st	MIMAT0003218	0.542855	0.937124	1.16754	0.560446	0.981945	1.1597	0.415318	0.771904	1.23106	0.743537	0.506957	-1.08665	0.211225	0.993609	1.37919	0.929594	0.670108	-1.02407	0.0777223	0.522869	1.62836	22	miRNA	UAUUGCACUCGUCCCGGCCUCC
ssc-miR-92b-5p_st	MIMAT0017278	0.594013	0.937124	-1.22824	0.744494	0.981945	1.13372	0.201751	0.632141	-1.64545	0.626872	0.456389	-1.20613	0.171967	0.993609	-1.70564	0.969232	0.692309	1.01587	0.790948	0.726153	1.11432	24	miRNA	AGGGACGGGACGCGGUGCAGUGUU
ssc-miR-935_st	MIMAT0004978	0.0061703	0.582516	1.66979	0.108803	0.981945	1.33327	0.65007	0.858953	1.08302	0.956912	0.560143	1.00953	0.626953	0.993609	1.08922	0.121717	0.490266	1.34176	0.0789179	0.522869	1.39899	23	miRNA	CCAGUUACCGCUUCCGCUACCGC
ssc-miR-95_st	MIMAT0000094	0.312862	0.882717	1.39977	0.0931142	0.981945	1.76514	0.341164	0.728236	-1.37285	0.335137	0.349709	-1.37841	0.83069	0.993609	-1.07322	0.41244	0.586311	-1.33487	0.937956	0.774679	-1.02765	22	miRNA	UUCAACGGGUAUUUAUUGAGCA
ssc-miR-98_st	MIMAT0000096	0.82345	0.937124	1.03641	0.294137	0.981945	1.18493	0.457542	0.787303	-1.12705	0.887038	0.540328	-1.02303	0.434548	0.993609	-1.13413	0.272401	0.549486	-1.20739	0.454875	0.657089	1.13612	22	miRNA	UGAGGUAGUAAGUUGUAUUGUU
ssc-miR-99a_st	MIMAT0000097	0.436271	0.924695	1.06492	0.761511	0.981945	-1.02471	0.248576	0.632141	1.09834	0.652824	0.471921	-1.03688	0.877091	0.993609	1.01251	0.650732	0.624875	1.03942	0.321044	0.629755	1.08906	22	miRNA	AACCCGUAGAUCCGAUCUUGUG
ssc-miR-99b_st	MIMAT0000132	0.304244	0.874739	1.15618	0.972503	0.981945	1.00484	0.22608	0.632141	1.18719	0.181565	0.277465	1.20911	0.237495	0.993609	-1.18216	0.644781	0.623288	1.07099	0.135966	0.526059	1.25309	22	miRNA	CACCCGUAGAACCGACCUUGCG
